# 1 **Topology-driven analysis of protein-protein interaction** 2 **networks detects functional genetic modules regulating** 3 **reproductive capacity**

4  
5 Tarun Kumar<sup>1</sup>, Leo Blondel<sup>2</sup> & Cassandra G. Extavour<sup>1,2\*</sup>

6 <sup>1</sup>Department of Organismic and Evolutionary Biology & <sup>2</sup>Department of Molecular and Cellular  
7 Biology, Harvard University, Cambridge MA-02138, USA

8  
9 \* correspondence to [extavour@oeb.harvard.edu](mailto:extavour@oeb.harvard.edu)

## 10 **Abstract**

11 Understanding the genetic regulation of organ structure is a fundamental problem in  
12 developmental biology. Here, we use egg-producing structures of insect ovaries, called  
13 ovarioles, to deduce systems-level gene regulatory relationships from quantitative functional  
14 genetic analysis. We previously showed that Hippo signalling, a conserved regulator of animal  
15 organ size, regulates ovariole number in *Drosophila melanogaster*. To comprehensively  
16 determine how Hippo signalling interacts with other pathways in this regulation, we screened all  
17 known signalling pathway genes, and identified Hpo-dependent and Hpo-independent signalling  
18 requirements. Network analysis of known protein-protein interactions among screen results  
19 identified independent gene regulatory modules regulating one or both of ovariole number and  
20 egg laying. These modules predict involvement of previously uncharacterised genes with higher  
21 accuracy than the original candidate screen. This shows that network analysis combining  
22 functional genetic and large-scale interaction data can predict function of novel genes regulating  
23 development.

24

25 **Keywords** : *Drosophila melanogaster*, Reproduction, Ovariole, Ovary, Egg laying, Topology,  
26 Network analysis, Interactome, Hippo signalling.

27

28

## 29 Introduction

30 The final shape and size of an organ is critical to organismal function and viability. Defects in  
31 human organ morphology cause a multitude of pathologies, including cancers, organ  
32 hypertrophies and atrophies (e.g. Yang and Xu, 2011). It is thus critical to understand the  
33 regulatory mechanisms underlying the stereotypic shape and size of organs. To this end,  
34 assessing the genetic regulation of size is significantly facilitated by using quantifiable changes  
35 in organ size and shape.

36

37 The *Drosophila melanogaster* female reproductive system is a useful paradigm to study  
38 quantitative anatomical traits. In these organs, the effects of multiple genes and the environment  
39 combine to produce a quantitative phenotype: a species-specific average number of egg-  
40 producing ovarian tubes called ovarioles. Fruit fly ovaries can contain as few as one and as  
41 many as 50 ovarioles per ovary, depending on the species (Kambysellis and Heed, 1971; King,  
42 1970; Markow et al., 2009; Sarikaya et al., 2019), with each ovariole capable of producing eggs.  
43 Ovariole number, therefore, may affect the reproductive fitness of *Drosophila* species by  
44 determining the potential of an adult female to produce eggs (Klepsatel et al., 2013b; R'kha et  
45 al., 1997). While ovariole number within a species can vary across temperatures (Azevedo et  
46 al., 1996), altitudinal and latitudinal clines (Capy et al., 1994; David and Bocquet, 1975), under  
47 constant environmental conditions ovariole number is highly stereotypic (Capy et al., 1993;  
48 Klepsatel et al., 2013a; R'Kha et al., 1991; R'kha et al., 1997). The reproducibility of ovariole  
49 number thus indicates a strong genetic component (Sarikaya et al., 2019). Genome wide  
50 association studies and quantitative trait locus mapping have demonstrated that the ovariole  
51 number is a highly polygenic trait (Bergland et al., 2008; Lobell et al., 2017; Orgogozo et al.,  
52 2006; Wayne et al., 2001; Wayne et al., 1997; Wayne and McIntyre, 2002). In contrast,  
53 functional genetic studies have identified only a small number of genes whose activity regulates  
54 ovariole number (discussed below). Thus, the complexity of the genetic regulation of this  
55 important trait remains largely unknown.

56

57 The determination of ovariole number in *D. melanogaster* occurs during late larval and pupal  
58 development (King et al., 1968). Each ovariole in the adult fly arises from a single primordial  
59 structure called a terminal filament (TF), which forms in the late third instar larval ovary (Godt  
60 and Laski, 1995) by convergent extension (Keller, 2006) of the terminal filament cells (TFCs)  
61 (Godt and Laski, 1995; Sahut-Barnola et al., 1996). TFCs are first specified from an anterior

62 population of somatic cells in the larval ovary by the expression of transcription factors including  
63 Bric-à-brac 1/2 (*bric-à-brac 1/2; bab1/2*) and Engrailed (*engrailed; en*) (Godt and Laski, 1995)  
64 (Sahut-Barnola et al., 1995). Initially a loosely arranged group in the anterior of the larval ovary,  
65 TFCs undergo morphogenetic movements to give rise to the ordered columns of cells that are  
66 TFs. Cell intercalation during convergent extension is dependent on the actin regulators Cofilin  
67 (*twinstar*) and the large Maf factor Traffic Jam (*traffic jam; tj*), and on E-cadherin dependent  
68 adhesion (Chen et al., 2001; Godt and Laski, 1995). Regulation of ovariole number is thus  
69 largely dependent on the specification of the TFCs and their rearrangement into TFs (Sarikaya  
70 and Extavour, 2015).

71  
72 We previously showed that the regulation of both TFC and TF number is dependent on the  
73 Hippo signalling pathway (Sarikaya and Extavour, 2015), a pan-metazoan regulator of organ  
74 and tissue size (Hilman and Gat, 2011; Sebe-Pedros et al., 2012). At the core of the Hippo  
75 kinase cascade are two protein kinases, Hippo (*hippo; hpo*) and Warts (*warts*), which prevent  
76 the nuclear localisation of the transcriptional co-activator Yorkie (*yorkie; yki*). Yki and the  
77 transcription factor Scalloped (*scalloped*) together initiate the transcription of multiple gene  
78 targets, including those that promote cell proliferation and survival. In the *D. melanogaster* larval  
79 ovary, loss of Hpo in the somatic cells causes an increase in nuclear Yki, leading to an increase  
80 in TFCs, TFs, ovariole number and egg laying in adults (Sarikaya and Extavour, 2015).

81  
82 Production of fertile eggs from a stereotypic number of ovarioles requires a spatially and  
83 temporally coordinated interplay of signalling between the somatic and germ line cells of the  
84 ovary. Thus, signalling amongst somatic and germ line cells in the larval ovary is crucial to all  
85 stages of ovarian development (Ables and Drummond-Barbosa, 2017; Gilboa, 2015; Green II et  
86 al., 2011; LaFever and Drummond-Barbosa, 2005; LaFever et al., 2010; Sarikaya and Extavour,  
87 2015). For instance, disruptions in insulin or Tor signalling affect both somatic and germ line cell  
88 proliferation (Gancz and Gilboa, 2013; Green II and Extavour, 2012; Hsu and Drummond-  
89 Barbosa, 2009; LaFever and Drummond-Barbosa, 2005; LaFever et al., 2010; Sarikaya et al.,  
90 2012). Similarly, ecdysone pulses from the prothoracic gland regulate the timely differentiation  
91 of the primordial germ cells (PGCs) and the somatic TFCs (Gancz et al., 2011; Hodin and  
92 Riddiford, 1998, 2000b). Both Hpo and ecdysone signalling also control the proportion of germ  
93 line to somatic cells by differentially regulating proliferation of both cell types (Gancz et al.,  
94 2011; Sarikaya and Extavour, 2015).

95

96 Although it is clear that genes function together in regulatory networks (Gonzalez and Kann,  
97 2012), determining how the few genes functionally verified as required for ovariole development  
98 and function, work together to coordinate ovariole number and ovarian function more generally,  
99 is a challenge because most genes or pathways have been considered individually. An  
100 alternative approach that is less often applied to animal developmental genetics, is a systems  
101 biology representation of complex biological systems as networks (Barabási and Albert, 1999;  
102 Watts and Strogatz, 1998). Protein-protein interaction (PPI) networks are such an example  
103 (Albert and Barabási, 2002). The availability of high throughput molecular biology datasets from,  
104 for example, yeast two-hybrid, protein CHiP and microarrays has allowed for the emergence of  
105 large scale interaction networks representing both functional and physical molecular interactions  
106 (Barabási and Oltvai, 2004; Berger et al., 2007; Giot et al., 2003; Gonzalez and Kann, 2012).

107  
108 With ample evidence that signalling in the ovary can affect ovarian development, but few genes  
109 functionally verified to date, we aimed to identify novel regulators of ovariole development by  
110 functionally testing all known members of all characterized *D. melanogaster* signalling  
111 pathways. We used tissue-specific RNAi to systematically knock down 463 genes in the larval  
112 ovary, and looked for modifiers of the *hpo* loss of function egg laying and ovariole number  
113 phenotypes. To analyse the results of this phenotypic analysis, we used topology-driven  
114 network analysis to identify genetic modules regulating these phenotypes, thus generating  
115 hypotheses about the relationships between these modules. With this systems biology  
116 approach, we identify not only signalling pathway genes, but also previously untested genes  
117 that affect these reproductive traits. Functional testing showed that these novel genes affect  
118 ovariole number and/or egg laying, providing us with a novel *in silico* method to identify target  
119 genes that affect ovarian development and function. We use these findings to propose putative  
120 developmental regulatory modules underlying one or both of ovariole formation and egg laying.

121

## 122 Results

### 123 An RNAi modifier screen for signalling pathway involvement in ovariole 124 number

125 To systematically ascertain the function of signalling pathway genes and their interactions with  
126 Hippo signalling in the development of the *D. melanogaster* ovary, we first curated a list of all

127 known and predicted signalling genes (Gramates et al., 2016; Kanehisa et al., 2010; Mbodj et  
128 al., 2013). We identified 475 genes belonging to the 14 developmental signalling pathways  
129 characterised in *D. melanogaster* (Table 1; Table S1), and obtained UAS:RNAi lines for 463 of  
130 these genes from the Vienna *Drosophila* RNAi centre (VDRC) or the TRiP collections at the  
131 Bloomington *Drosophila* Stock centre (BDSC) (all *D. melanogaster* genetic lines used are listed  
132 in Methods).

133  
134 We previously showed that reducing the levels of *hpo* in the somatic cells of the larval ovary  
135 using *traffic jam* Gal4 (*tj:Gal4*) driving *hpo*[RNAi] increased both ovariole number and egg laying  
136 of adult female flies (Sarıkaya and Extavour, 2015). To identify genes that modify these  
137 phenotypes, we used *tj:Gal4* to drive simultaneous *hpo*[RNAi] and RNAi against a signalling  
138 candidate gene, and quantified the phenotypic change (Figure 1a-d). We observed that on  
139 driving two copies of *hpo*[RNAi] using *tj:Gal4*, we obtained a further increase in both egg laying  
140 and ovariole number (Figure 1e). This indicates that ovaries have further potential to increase  
141 ovariole number and egg laying beyond the increase induced by *tj:Gal4* driving one copy of  
142 *hpo*[RNAi], and that *tj:Gal4* can drive the expression of two RNAi constructs, indicating that our  
143 screen could identify both enhancers and suppressors of the *tj:Gal4*>*hpo*[RNAi] phenotype.

144  
145 We proceeded to identify modifiers of the *tj:Gal4*>*hpo*[RNAi] phenotype by crossing males of  
146 each of the 463 candidate genes RNAis individually with *tj:Gal4*>*hpo*[RNAi] females, and  
147 performing three phenotypic screens on the offspring. In the first screen (Figure 1a), we  
148 measured egg laying of three F1 female offspring (*tj:Gal4*>*hpo*[RNAi], *signalling*  
149 *candidate*[RNAi]) over 5 days. To address batch variation (Figure S1), we standardized egg  
150 laying measurements by calculating the Z scores ( $Z_{gene}$  = number of standard deviations from  
151 the mean) for each candidate line relative to its batch controls. 190 genes had an egg laying  
152  $|Z_{gene}|$  below 1. Previous studies have shown that the egg laying of newly eclosed adult mated  
153 females correlates with ovariole number during the first five days (Klepsatel et al., 2013b). We  
154 therefore eliminated these 190 genes from subsequent screening, because the change in egg  
155 laying was so modest that we considered these candidates were unlikely to show changes in  
156 ovariole number when compared to controls.

157  
158 In the second screen (Figure 1b), we measured egg laying in a wild-type background  
159 (*tj*>*signalling candidate*[RNAi]) for the 273 remaining candidate genes. For the third screen  
160 (Figure 1c), we quantified the ovariole number of *tj:Gal4*>*hpo*[RNAi], *signalling candidate*[RNAi]

161 F1 adult females for the same 273 candidate genes. To choose candidates from the second and  
162 third screens for further study, we wished to account for the fact that the two screens had  
163 different effective numbers of data points. This was because egg laying data were obtained from  
164 individual vials of three females over five days, while ovariole numbers were obtained from 20  
165 ovaries from ten females (see methods). We therefore selected the 67 genes with a  $|Z_{gene}|$  above  
166 two for ovariole number (Figure 1c, 1d; Table 2), and the 49 genes with a more conservative  
167  $|Z_{gene}|$  above five for egg laying (Figure 1a, 1b, 1d; Table 2), for a total of 116 positive candidates  
168 for subsequent analyses.

169

## 170 Ovariole number is weakly correlated with egg laying

171 Standardization of the results from the three screens using Z scores allowed us to compare the  
172 effects of individual genes on one or both of egg laying and ovariole number. We performed a  
173 pairwise comparison of the  $Z_{gene}$  values for all combinations of screens, and considered genes  
174 with  $|Z_{gene}|$  values that were above the thresholds set for the phenotype in each screen (above  
175 two for ovariole number, above five for egg laying; green dots in Figure 2a-c. Across all three  
176 screens, loss of function of our positive candidates yielded reductions in ovariole number and  
177 egg laying more commonly than increases (Figure 2a-c). Comparing the  $|Z_{gene}|$  values of egg  
178 laying and ovariole number of *tj:Gal4>hpo[RNAi]*, *signalling candidate[RNAi]* adult females  
179 revealed that genes that caused a change in egg laying did not always similarly affect ovariole  
180 number, and vice versa (Figure 2a). We therefore hypothesise that egg laying and ovariole  
181 number may be regulated by genetically separable mechanisms. This hypothesis  
182 notwithstanding, we observed a weak but statistically significant correlation between egg laying  
183 and ovariole number ( $p=1e10^{-5}$ ; Figure 2d), and this correlation was most significant in adult  
184 females that had a drastic reduction in both phenotypes (Figure 2a).

185

## 186 No single signaling pathway dominates regulation of ovariole number or 187 egg laying

188 We found that at least some genes from all tested signalling pathways could affect both egg  
189 laying and ovariole number (Figure 3). To determine if some pathway(s) appeared to play a  
190 more important role than others in these processes, we asked whether any of our screens were



191 enriched for genes from a specific signalling pathway. To measure enrichment, we compared  
192 the distribution of individual pathway genes among the positive candidates in each screen to a  
193 bootstrapped null distribution of pathway genes among a group of the same number of genes  
194 randomly selected from our curated list of 463 signalling genes (Figure 3a). Involvement of a  
195 pathway in the regulation of a phenotype would be reflected in a difference between the  
196 representation of pathway genes in an experimentally derived list and a randomly selected  
197 group of signalling genes. We found that rather than only one or a few pathways showing  
198 functional evidence of regulating ovariole number or egg laying, nearly all pathways affected  
199 both phenotypes (Figure 3a). We further tested this result by calculating the hypergeometric p-  
200 value for the enrichment of each signaling pathway, in each of the three groups of genes.  
201 Consistent with the results of the bootstrapping approach (Figure 3a), we found that most  
202 pathway members were not significantly enriched for egg laying or ovariole number phenotypes  
203 (Figure 3b). The absence of significant enrichment of any specific pathway is not simply  
204 attributable to the pool of genes that were screened, because our experimental manipulations of  
205 ovariole number and egg laying did cause a change in the distribution of signalling pathway  
206 members (Figure S2a). Instead, both phenotypes appeared to be regulated by members of  
207 most or all signalling pathways (Figure 3; Figure S2). The only two exceptions to this trend were  
208 a greater than twofold enrichment of (1) genes from the Notch signalling pathway in the  
209 regulation of ovariole number (p-value < 0.05, pink bar in Figure 3a, b), and (2) members of the  
210 Hedgehog (Hh) signaling pathway in the regulation of Hippo-dependent egg laying (p-value <  
211 0.05, brown bar in Figure 3a, 3b; Figure S3). In summation, our analyses of the enrichment of  
212 signalling pathways within the different screens indicated that both ovariole number and egg  
213 laying are regulated by genes from nearly all described animal signalling pathways (Figure 3a),  
214 rather than being dominated by any single pathway.

215  
216 Comparing the results of the Egg Laying screens performed in a wild type background (Figure  
217 1b) or in a *hpo[RNAi]* background (Figure 1a), revealed that most of the genes that met a  
218 threshold of  $|Z_{gene}| > 5$  in one screen, did not meet that threshold in the other screen (Figure 2c).  
219 This result suggests the existence of both Hippo-dependent and Hippo-independent  
220 mechanisms of regulation of egg laying. The interpretations of separable Hippo-dependent and -  
221 independent regulation of egg laying, and of the separable regulation of ovariole number and  
222 egg laying, was supported by the results of the network analysis described in the following  
223 section.

## 224 Centrality of genes in the ovarian protein-protein interaction networks can 225 predict the likelihood of loss of function phenotypic effects

226 The finding that these reproductive traits were regulated by the genes of all signalling pathways  
227 led us to consider the broader topology of putative gene regulatory networks in the analysis of  
228 our data. Previously characterized genes in the ovary are often pleiotropic and can regulate  
229 both ovariole number and egg laying (Gilboa, 2015; Sarikaya and Extavour, 2015). As with  
230 proteins in a linear pathway, proteins in a protein-protein interaction (PPI) network are more  
231 likely to function in conjunction with genes that are connected to them within the network (e.g.  
232 Ideker and Sharan, 2008; Jeong et al., 2001). Centrality is one measure of the connectedness  
233 of a gene in the PPI and can be used to identify the most important functional centres within a  
234 protein network (Hahn and Kern, 2005; Ma'ayan, 2011). Most centrality measures use path  
235 length, which is a measure of the number of other proteins required to link any two proteins in  
236 the network. Here we used four commonly used metrics to quantify gene centrality, each  
237 measuring slightly different properties (Jalili et al., 2016; Koschutzki and Schreiber, 2008). (1)  
238 *Degree centrality* is proportional to the number of proteins that a given protein directly interacts  
239 with. (2) *Betweenness centrality* measures the number of shortest paths amongst all the  
240 shortest paths between all pairs of proteins that require passing through a particular protein. (3)  
241 *Closeness centrality* measures the average shortest path that connects a given protein to all  
242 other proteins in the network. (4) *Eigenvector centrality* is a measure of the closeness of a given  
243 protein to other highly connected proteins within the network.

244  
245 We hypothesised that if the candidate genes we identified in our screen as playing roles in  
246 ovarian function worked together as a PPI network, then the degree of centrality of a gene might  
247 be an indicator of function. To test this hypothesis, we calculated the four centrality measures,  
248 described above, for all genes within the *D. melanogaster* PPI (Figure S4). We then rank  
249 ordered only the genes tested in each screen by their score for each centrality measure, and  
250 asked whether their rank order correlated with the results of the screen, plotting these results as  
251 a receiver operating characteristic (ROC) curve. Positive correlations between centrality (a  
252 continuous variable) and phenotype (a binary variable: above or below the  $|Z_{gene}|$  threshold) are  
253 reflected in an area under the curve (AUC) of more than 0.5. We found that the higher the  
254 centrality score, the greater the likelihood that a gene had  $|Z_{gene}|$  values above our threshold for  
255 effects on ovariole number and egg laying (Figure 4a; Table S3). This supports the premise that  
256 the positive candidates identified in our screen function together as a network in the regulation



257 of either ovariole number or egg laying. Interestingly, while the centrality of genes did predict  
258 whether a gene would affect our phenotypes of interest, it could only weakly predict the strength  
259 of that effect (Figure S5).

260

## 261 Genes regulating egg laying and ovariole number regulation form non- 262 random interaction modules

263 The centrality analyses above suggested that the genes implicated in ovariole number and egg-  
264 laying displayed characteristics of a functional network. PPI networks can often be further sorted  
265 into a collection of sub-networks. A sub-network is a smaller selection of proteins from the PPI.  
266 Examples of such sub-networks could be proteins within the same subcellular organelle (Foster  
267 et al., 2006) or genes that are expressed at the same time (Spellman et al., 1998), thus making  
268 them likely to function together (Srinivasan et al., 2007). A module is a sub-network that can  
269 perform regulatory functions independent of other sub-networks, and has key measurable  
270 features (Barabási and Oltvai, 2004; Hartwell et al., 1999; Ravasz et al., 2002; Yook et al.,  
271 2004). We therefore asked if our sub-networks consisting of genes that showed similar mutant  
272 phenotypes might constitute such functional modules. To determine whether genes that were  
273 implicated in regulation of ovariole number and egg laying interacted with each other in specific  
274 groups more than would be expected by chance, we created four lists of genes, called “seed”  
275 lists, based on their individual phenotypic effects based on our screen results: (1) the core seed  
276 list, including genes positive in all three screens (Figure 4b); (2) the egg laying seed list,  
277 including genes positive in the wild type background egg-laying screen (Figure 1b; Figure 4c);  
278 (3) the *hpo[RNAi]* egg laying seed list, including genes positive in the *hpo[RNAi]* background  
279 egg laying screen (Figure 1a; Figure 4c); and (4) the *hpo[RNAi]* ovariole seed list, including  
280 genes positive in the *hpo[RNAi]* background ovariole number screen (Figure 1c; Figure 4c).  
281 Interestingly, the core seed list, comprising genes that affected all three measured phenotypes,  
282 only consisted of genes that caused a reduction in both ovariole number and egg laying (Figure  
283 4b).

284

285 Based on published molecular interactions, putative functional modules of genes can be  
286 predicted by algorithms that use either the shortest path method (Bromberg et al., 2008) or the  
287 Steiner Tree approach (Huang and Fraenkel, 2009). Such methods identify and predict

288 functional connections between the seed proteins, as well as additional nodes (proteins or  
289 genes) that have not been experimentally tested within the given parameters, but are known to  
290 interact with the seed genes in the PPI (Albert and Albert, 2004)(Yu et al., 2006). This process  
291 results in a predicted module, and subsequent functional genetic testing of this module can  
292 confirm its functionality. Given its recent success in predicting gene modules, we used the  
293 previously published Seed Connector Algorithm (SCA), a member of the Steiner Tree algorithm  
294 family (Wang et al., 2017; Wang and Loscalzo, 2018), to identify putative functional modules  
295 formed by genes that had similar phenotypic effects in our screens (Figure 4b, 4c). The SCA  
296 connects seed genes and previously untested novel genes (connectors) to each other using a  
297 known PPI network, producing the largest possible connected putative module given the data.  
298 We compiled a PPI network consisting of all described interactions between *D. melanogaster*  
299 proteins, from the combination of publicly available PPI studies in the DroID database (see  
300 Methods). Using this PPI network and the aforementioned four seed lists, we applied a custom  
301 python implementation of the SCA (Methods: 04\_Seed-Connector.ipynb) to build and extract the  
302 largest possible (given our PPI) connected putative modules that regulate egg laying and  
303 ovariole number.

304 This SCA method yielded four putative modules, one for each seed list, which we refer to as the  
305 core module (Figure 5b), *hpo[RNAi]* Egg Laying module (Figure S6a), Egg Laying module  
306 (Figure S6b), and *hpo[RNAi]* Ovariole Number Module (Figure S6c) respectively. Each of the  
307 modules contained seed genes, which had been functionally evaluated in our screens (green  
308 and red circles in Figure 5), as well as connector genes, which were genes newly predicted as  
309 regulators of these phenotypes (green and red triangles in Figure 5).

310 We then asked whether these four putative modules were more connected than we would  
311 expect by chance; in other words, we formally tested them for modularity. Meeting our criteria  
312 for modularity would suggest that the genes in these modules operated together as functional  
313 sub-networks within the *Drosophila* PPI. We defined our modularity test using four commonly  
314 measured network metrics: (1) Largest Connected Component (LCC) (the number of proteins  
315 connected together by at least one interaction), (2) network density (the relative number of  
316 edges as compared to the theoretical maximum), (3) total number of edges, and (4) average  
317 shortest path (average of the minimum distances connecting any two proteins). We considered  
318 a group of genes to form a module if they showed higher LCC, higher network density, more  
319 edges, and shorter average shortest path length than a random, bootstrapped selection of the  
320 same number of genes from the PPI.

321

322 To determine whether these criteria would correctly identify genes of the same signaling  
323 pathway, which are known to function together, as a module, we measured these four  
324 parameters in the original set of genes used in this study (Table 1). We found that all the genes  
325 of a given signalling pathway were identified as a module based on these parameters (Figure  
326 S7a). We then used this approach to test the modularity of the four phenotypic sub-networks, as  
327 compared to 1000 bootstrapped “control sub-networks” consisting of a group of the same  
328 number of genes as contained in the sub-network, but chosen randomly from among the  
329 candidate genes from our initial screen list (Table 1). We found that the four predicted  
330 phenotypic modules showed a significantly increased Largest Connected Component (LCC)  
331 value, network density, number of edges and decreased average shortest path (Figure S7b),  
332 compared to our “control module”. This result indicates that these sub-networks are likely to  
333 function as modules within the PPI, to regulate one or both of ovariole number or egg laying.

334

335 Low edge densities between modules indicates genetically separable  
336 mechanisms of ovariole number and egg laying

337 Our network analysis identified four highly connected networks of genes that regulate two  
338 distinct developmental processes, together with or independently of Hippo signalling activity:  
339 ovariole number determination, which occurs primarily during larval development, and egg  
340 laying, which takes place in adult life (Figure 5). We wished to assess the degree to which there  
341 were any shared genetic components between the four modules. To understand potential  
342 interactions between the modules in the regulation of both ovariole number and egg laying, we  
343 constructed a composite network of all genes in each of the four modules (Figure 5b; Figure  
344 S6), which we refer to as the “meta network” (Figure 7a). We then grouped the genes based on  
345 their phenotypic effects as measured in the three screens, resulting in seven sub-networks (I-VII  
346 in Figure 7a). We then asked if these sub-networks were as connected to each other, as were  
347 the genes within each of the sub-networks. To do this, we used an edge density map, which  
348 reflects the number of interactions between the genes within a sub-network and between each  
349 of the sub-networks (Figure 7b).

350 This analysis yielded three principal findings. First, edge densities between the three sub-  
351 networks corresponding to the three scored phenotypes (I, II and III in Figure 7a) were very low  
352 (Figure 7b). This indicates that genes in each of these sub-networks function as largely  
353 independent networks, rather than interacting substantially with any genes in the other non-core  
354 sub-networks. Second, the core sub-network (IV in Figure 7a) displayed a higher edge density  
355 with the other three sub-networks (I, II and III in Figure 7a) than any of them did with each other  
356 (Figure 7b). Consistent with the definition of core module genes as regulating all three scored  
357 reproductive phenotypes, this result suggests that the core module genes, in contrast to those  
358 from the other three sub-networks, may share substantial functional interactions with genes of  
359 the other sub-networks. Finally, three small additional sub-networks emerged from this analysis  
360 (V, VI and VII in Figure 7a), suggesting small functional networks of genes that work together to  
361 regulate two of the three scored phenotypes. In sum, this meta network analysis supports the  
362 hypothesis of three largely independent genetic networks that regulate Hippo-dependent  
363 ovariole number, Hippo-dependent egg laying, and Hippo-independent egg laying. Moreover,  
364 each of these genetically separable networks included genes in multiple signalling pathways  
365 (Figure 7c).

366

## 367 Network analysis predicts novel genes involved in egg laying and ovariole 368 number

369 The four predicted phenotypic modules produced by the SCA approach included connector  
370 genes that were not included in our original screen, and thus had not been tested for possible  
371 effects on our phenotypes of interest (triangles in Figure 5b; Figure S6). Given that prior work in  
372 human disease models showed that predicted disease modules can correctly predict gene  
373 involvement in the relevant diseases (Chen et al., 2006; Gonzalez et al., 2007; Wang et al.,  
374 2017; Wang and Loscalzo, 2018), we asked whether our deployment of the SCA had likewise  
375 successfully predicted novel, functionally important genes in each module. To do this, we  
376 measured the effects of knocking down each the connector genes (triangles in Figure 5b and  
377 Figure S6) on ovariole number and egg laying, using *UAS:RNAi* lines for each connector, driven  
378 by *tj:Gal4*.

379 Of the ten predicted novel connectors in the core module, loss of function of several of these  
380 had significant effects on at least one of the three scored phenotypes. Five affected ovariole

381 number two affected Hpo-dependent egg laying, and one affected Hpo-independent egg laying.  
382 However, only one of them significantly altered all three scored phenotypes (Figure 6a; Table  
383 S4).

384 The predicted connector genes from two of the other three phenotypic modules showed high  
385 positive prediction rates. RNAi against seven out of 18 of the *hpo[RNAi]* Egg Laying module  
386 connectors, three out of 11 of the *hpo[RNAi]* Ovariole Number module connectors, and none of  
387 the 11 Egg Laying module connectors, significantly affected the module phenotype (Table S4).  
388 Thus, although the Egg Laying module connectors failed to impact this phenotype in our assay,  
389 41.2% and 27.3% of the connectors from the other two modules were correctly predicted  
390 (Figure 6b; Table S4). These positive hit rates exceed those obtained in our initial candidate  
391 screens, where 59/463 (12.7%) and 67/273 (24.5%) tested genes affected *hpo*-dependent egg  
392 laying and *hpo*-dependent ovariole number respectively (Figure 6d; Table 2). In sum, taken  
393 across all modules (Figure 6c; Table S4, Table S5), this network analysis correctly identified  
394 genes regulating all scored reproductive phenotypes, at rates higher than those obtained in the  
395 original screen of 463 members of all known signalling pathways. By this measure, testing  
396 network-predicted regulatory modules derived from experimentally obtained data was even  
397 more successful than testing signalling pathways as a means of identifying novel genes that  
398 regulate ovariole number and egg laying.

## 399 Discussion

400

### 401 Identification of regulatory modules for ovariole development and egg 402 laying

403 The *D. melanogaster* ovary is a commonly studied model for organogenesis (Chen et al., 2001;  
404 Godt and Laski, 1995; Lobell et al., 2017; Sarikaya and Extavour, 2015), stem cell maintenance  
405 (Gilboa, 2015) and interactions of development and ecology (Cohet and David, 1978; Hodin and  
406 Riddiford, 2000a; Klepsatel et al., 2013a; Sarikaya et al., 2019). Nevertheless, our  
407 understanding of the genetic mechanisms that regulate these processes remains fragmentary.  
408 In this paper, we have identified four distinct protein interaction modules that regulate ovariole  
409 number and egg laying in the *D. melanogaster* ovary. These modules consist of both novel and

410 previously characterized genes that regulate either ovariole number or egg laying or both, thus  
411 enhancing our understanding of the genetic underpinnings of this reproductive system.

412  
413 Of the four modules, the core module affects both ovariole number and egg laying. The core  
414 module contains numerous housekeeping genes, including regulators of transcription,  
415 translation and cell division such as *polo* (Llamazares et al., 1991), *cyclin K* (Edwards et al.,  
416 1998), *nucleosome assembly protein 1* (Ito et al., 1996) and *eukaryotic translation release factor*  
417 *1* (Chao et al., 2003). While *polo* and *eukaryotic translation release factor 1* are members of  
418 signalling pathways, *cyclin K* and *nucleosome assembly protein 1* are genes predicted by the  
419 SCA. Given that the core module largely consists of genes whose loss of function decreases  
420 both of these parameters, we hypothesise that these are essential genes for the basic structure  
421 and function of the ovaries. Essential genes are more interconnected in a PPI with higher  
422 centrality measures (Jeong et al., 2001) and interestingly, we find that the genes in the core  
423 module also have higher connectivity than those in the other three modules (Figure S4).

424  
425 In addition to genes that regulate basic cellular processes, the core module is enriched for the  
426 core components of the Hh signalling cascade, namely *patched (ptc)*, *smoothened (smo)* and  
427 *costa (cos)* (Lee et al., 2016). However, we find that the loss of Hh ligand, which is expressed in  
428 the TF cells in the developing larval ovary (Lai et al., 2017), does not significantly affect either  
429 ovariole number or egg laying. Though surprising, ligand-independent activation of Hedgehog  
430 signalling has been observed before. For example, in the *Drosophila* eye, loss of either *ptc* or  
431 *cos* in clones leads to non-cell autonomous proliferation in wild type cells, as well as growth  
432 disadvantages in the mutant tissue (Christiansen et al., 2012). In another example, sufficient  
433 intracellular *smo* levels can also activate downstream transcription of Hh pathway targets,  
434 showing that Hh itself is not always required to activate the cascade (Jiang et al., 2018).

## 435 Development of the larval ovary

436 The *hpo[RNAi]* Ovariole Number module is composed of genes that affect the Hippo signalling  
437 activity-dependent determination of ovariole number during development. Establishment of  
438 ovariole number occurs largely during the third instar stage of larval development in *D.*  
439 *melanogaster* (Godt and Laski, 1995; Hodin and Riddiford, 1998; King et al., 1968; Sahut-  
440 Barnola et al., 1996). During this period, the TFCs are specified in the anterior of the ovary and  
441 undergo rearrangement into stacks of cells called TFs, each of which gives rise to an ovariole  
442 (Godt and Laski, 1995; Sahut-Barnola et al., 1995). TF specification requires the expression of



443 *engrailed* (En) (Bolívar et al., 2006) and the transcription factors Bab1 and Bab2, encoded by  
444 the *bric-à-brac* locus (Couderc et al., 2002; Godt et al., 1993). A third transcription factor,  
445 Lmx1a, was recently found to be necessary for the specification of the TFCs (Allbee et al.,  
446 2018). Our *hpo*[RNAi] Ovariole Number module identifies numerous additional novel  
447 transcription factors including *bunched* (*bun*) and *retinoblastoma-family protein* (*rbf*), which we  
448 hypothesize could also be involved in the specification of ovariole number. *bun* and *rbf* have  
449 been implicated in the migration (Dobens et al., 2005) and endoreplication (Cayirlioglu et al.,  
450 2003) of the follicle cells during oogenesis, but have not, to our knowledge, been previously  
451 identified as playing a role in the context of larval ovary development.

452  
453 The TFCs specified in the larval ovary undergo a process of convergent extension to form TFs.  
454 This process of convergent extension requires cell intercalation, and the actin depolymerizing  
455 factor Cofilin, encoded by the gene *twinstar*, is essential to this process (Chen et al., 2001).  
456 During intercalation, the cells also dynamically modify their actin cytoskeleton and their  
457 expression of E-cadherin (Godt and Laski, 1995). Our *hpo*[RNAi] Ovariole Number module  
458 further identifies *Rho1* (Barrett et al., 1997) and *Rho kinase* (*Rok*) (Mizuno et al., 1999) as  
459 necessary for correct ovariole number. During the extension of the *D. melanogaster* embryonic  
460 germ band, a commonly studied model of convergent extension, the localised activation of the  
461 actin-myosin network facilitated by *Rho1* and *Rok* is necessary for cell intercalation (Kasza et  
462 al., 2014). Given the known roles of *Rho1* and *Rok* as regulators of the actin cytoskeleton  
463 (Ridley, 2006), we propose that TF assembly in the ovary requires both these proteins for  
464 correct cell intercalation. A third actin cytoskeleton regulator, *misshapen* (*msn*), was also  
465 identified by our *hpo*[RNAi] Ovariole Number module. *msn* encodes a MAP kinase previously  
466 shown to regulate the polarisation of the actin cytoskeleton during oogenesis (Lewellyn et al.,  
467 2013), but has not, to our knowledge, been studied to date in the context of larval ovarian  
468 development.

469  
470 We propose that the polarity of the somatic cells in the ovary is also necessary for correct larval  
471 ovary development, given the presence of the lateral membrane proteins *discs large 1* (*dlg1*)  
472 and *prickle* (*pk*) in the ovariole module. During the maturation of the TFs during larval  
473 development, the TFCs undergo significant cell shape changes, coincident with localised  
474 expression of beta-Catenin and actin to the lateral edges of the TFCs (Godt and Laski, 1995).  
475 Restriction of the E-cadherin domain in epithelia requires establishment of the basolateral

476 domain (Harris and Peifer, 2004) and we propose that testing a similar requirement for *dlg1* and  
477 *pk* in the larval ovary would be a fruitful avenue for future studies.

## 478 Network analysis as a tool in developmental biology

479 Using a systems biology approach to analyse RNAi screening data has proven fruitful, providing  
480 us with new insights into the development and function of the *D. melanogaster* ovary by  
481 identifying novel and previously understudied genes that regulate this process. Systematic  
482 analysis of the function of single genes in development has been a historical convention and  
483 has provided valuable and precise genetic interaction information (Jansen et al., 2002; von  
484 Mering et al., 2002). With the advent of genome-wide analysis, however, we can use data from  
485 a larger number of genes to predict the identity of additional functionally significant genes with  
486 relative ease (Yu et al., 2006). We note that the novel gene prediction rate ranged from as high  
487 as 41.2% from the *hpo[RNAi]* Ovariole Number module to as low as 0% from the Egg Laying  
488 module (Figure 6b; Tables S4, S5). We suggest that this may be due to multiple factors. Firstly,  
489 the possible incompleteness of the PPI is expected to lead to some areas of the network being  
490 sparse or non-existent (von Mering et al., 2002). If the module of interest happens to fall in such  
491 regions of the network, prediction algorithms will fail. Secondly, the initial restriction of tested  
492 genes to signaling pathway members might have provided a seed list too sparse to usefully  
493 predict functional connectors. Finally, it could be the case that “Egg Laying” is such a complex  
494 phenotype that its gene regulation cannot be adequately captured within a highly connected  
495 network of the type suited for identification by the analyses we have used here. Ovariole  
496 number in *D. melanogaster* is the outcome of a discrete developmental process with a clear  
497 beginning and end, comprising a specific series of cellular behaviors that take place in the  
498 confines of one organ (Godt and Laski, 1995; Hodin and Riddiford, 2000a; Sahut-Barnola et al.,  
499 1996). Once established during larval life, ovariole number in *Drosophila* remains unaltered  
500 through to and during adulthood, even if oogenesis within those ovarioles suffers congenital or  
501 age-related defects (King, 1970). Because previous work suggested that ovariole number in  
502 *Drosophila* could have at least some predictive relation to egg laying (Cohet and David, 1978;  
503 Klepsatel et al., 2013b; Sarikaya and Extavour, 2015), we reasoned that scoring the latter  
504 phenotype in a primary screen (Figure 1a) could be an effective way to uncover ovariole number  
505 regulators (Figure 1c). While our results showed that this was true in many cases, it was also  
506 clear that these two traits can vary independently (Figure 2), highlighting the fact that ovariole  
507 number is not the only determinant of egg laying. Egg-laying dynamics, even during the limited

508 five day assay used in our study, are likely influenced not just by a single anatomical parameter  
509 such as ovariole number, but rather by many biological, biomechanical, hormonal and  
510 behavioural processes. Consequently, the functional module we were able to extract from the  
511 results of this screen (Figure 1b) might be too coarse to extract novel genes that participate in  
512 potentially complex gene interactions regulating egg laying.

513 The predictive rates of the approach we have used here, although encouraging, are likely  
514 limited by the degree of noise in the high throughput data used to generate the PPI (Li et al.,  
515 2010), the sparseness of the PPI, and the degree of misidentification of protein interactions  
516 (Zhang et al., 2017). Addressing one or more of these parameters could improve the outcomes  
517 of future network predictions from developmental genetics data. For example, the problem of  
518 sparseness, which is a paucity of high confidence detectable interactions relative to all  
519 biologically relevant interactions, has been addressed in other studies by using an “Interolog  
520 PPI” (Matthews et al., 2001) in place of an organism-specific PPI. The Interolog PPI combines  
521 known interactions from multiple organisms, and has been used successfully to identify, for  
522 example, gene modules relevant in squamous carcinoma, based on a starting dataset of  
523 microarray data on differentially expressed genes between cancer cells and the surrounding  
524 tissue (Wachi et al., 2005). Future studies applying the Interolog PPI to the outcomes of genetic  
525 screens for developmental processes of interest could potentially overcome the problem of  
526 sparseness, as well as the biases towards proteins that are more heavily studied and thus  
527 better represented in organism-specific PPIs.

## 528 Tables

### 529 Table 1

| Signalling pathway | Number of genes in screen |
|--------------------|---------------------------|
| EGF                | 45                        |
| FGF                | 25                        |
| FOXO               | 67                        |
| Hippo              | 60                        |
| JAK/STAT           | 31                        |
| JNK                | 28                        |
| MAPK               | 29                        |
| Notch              | 48                        |
| SHH                | 54                        |
| TGF B              | 52                        |
| Toll               | 36                        |
| VEGF               | 17                        |
| Wnt                | 125                       |
| mTOR               | 36                        |

530

531 **Table 1: Number of candidate genes tested in each signalling pathway.** Candidate genes  
532 are grouped by their reported roles in one or more signalling pathways based on published  
533 literature. Genes in this list are not necessarily unique to a single pathway, but may function in  
534 more than one signalling pathway. The list of specific genes per pathway that were included in  
535 the screen for functional analysis (Figure 1) is found in Table S1.

536

537 Table 2

538

| Egg Laying Screens                  | <i>hpo</i> [RNAi] Egg Laying (Figure 1a) | Egg Laying (Figure 1b) | Ovariole Number Screen              | <i>hpo</i> [RNAi] Ovariole Number (Figure 1c) |
|-------------------------------------|------------------------------------------|------------------------|-------------------------------------|-----------------------------------------------|
| RNAi stocks unavailable             | 12                                       | 0                      | RNAi stocks unavailable             | 0                                             |
| Primary filter ( $ Z_{gene}  < 1$ ) | 190                                      | N/A                    | Primary filter ( $ Z_{gene}  < 1$ ) | N/A                                           |
| No effect ( $-5 <  Z_{gene}  < 5$ ) | 214                                      | 224                    | No effect ( $-2 <  Z_{gene}  < 2$ ) | 206                                           |
| Negative effect ( $Z_{gene} < -5$ ) | <b>48</b>                                | <b>44</b>              | Negative effect ( $Z_{gene} < -2$ ) | <b>54</b>                                     |
| Positive effect ( $Z_{gene} > 5$ )  | <b>11</b>                                | <b>5</b>               | Positive effect ( $Z_{gene} > 2$ )  | <b>13</b>                                     |
| <b>Total</b>                        | <b>475</b>                               | <b>273</b>             | <b>Total</b>                        | <b>273</b>                                    |

539

540 **Table 2: Results of the three functional genetic screens.** Number of genes tested in each screen and cumulative results.541 “Negative effect” corresponds to a reduction in eggs laid or number of ovarioles below the Z score ( $Z_{gene}$ ) threshold for each542 phenotype. “Positive effect” indicates an increase above the set  $Z_{gene}$  thresholds.  $Z_{gene}$  thresholds for each category in each screen543 are indicated in brackets. The primary filter of  $|Z_{gene}| < 1$  was applied only to the *hpo*[RNAi] Egg Laying screen shown in Figure 1a.544 The list of specific genes that exceeded our chosen  $Z_{gene}$  thresholds for each scored phenotype (Figure 1), and were therefore

545 considered to have a positive or negative effect on the phenotype, is found in Table S1. The 12 genes for which RNAis stocks were

546 unavailable at the time of testing are listed in Table S2.

547 **Figures**

548 **Figure 1**

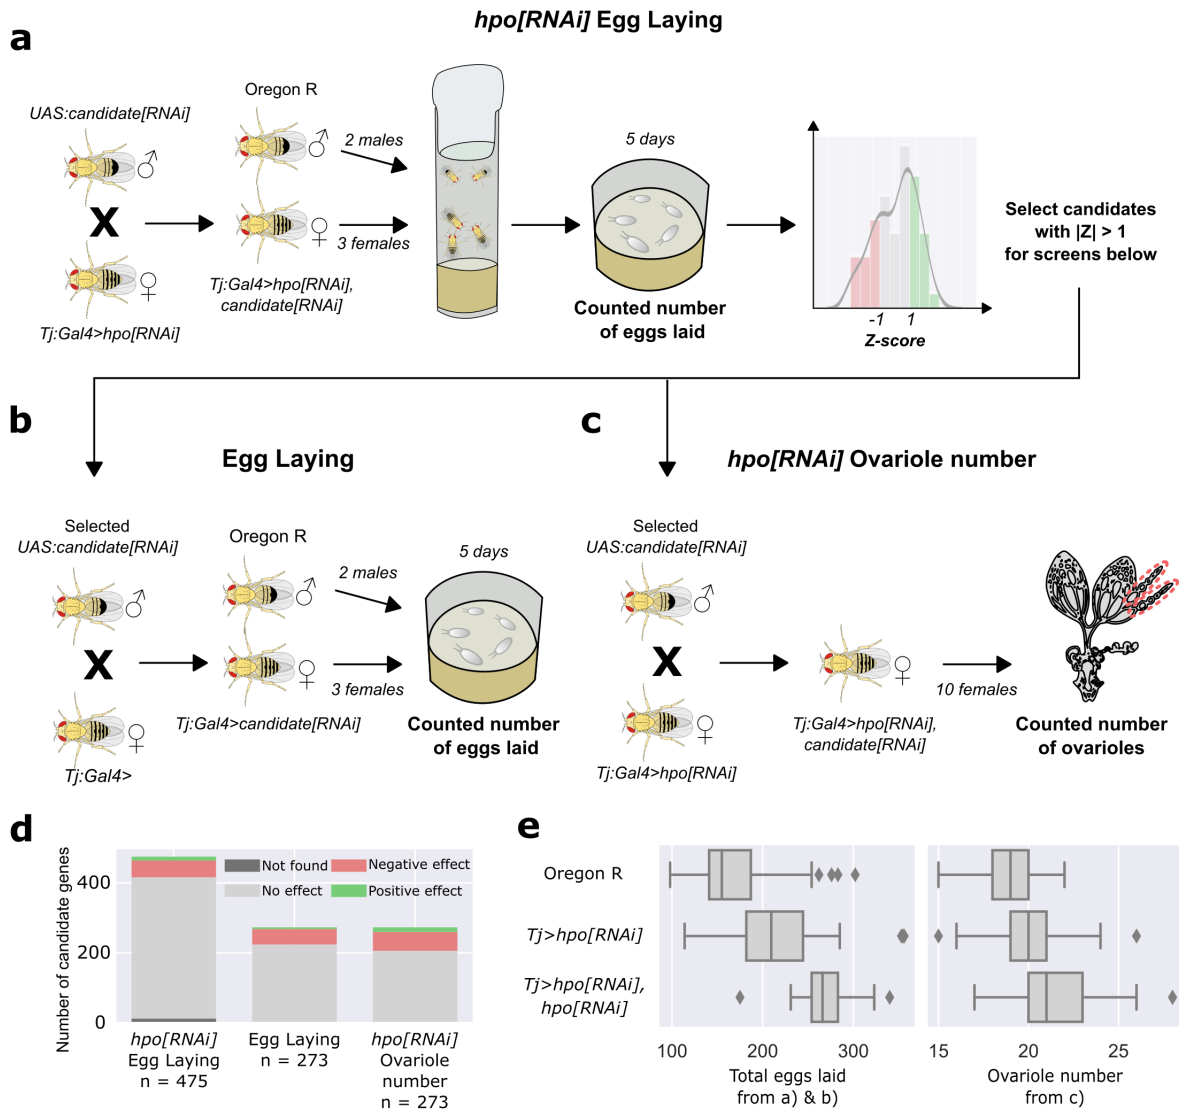

549  
550

551 **Figure 1. Screen methodology. a,b,c)** Diagrammatic representation of screen workflow. **d)**  
552 Distributions of results of genes in the three screens. n = number of genes tested in each  
553 screen (see also Table 2). **e)** Total eggs laid by three female flies over five days (left panel) and  
554 ovariole number (right panel) of Oregon R (top row), *tj:Gal4* driving one copy of *UAS:hpo*[RNAi]  
555 (*tj:Gal4* driving two copies of *UAS:hpo*[RNAi] (bottom row), showing that, the  
556 previously reported *tj:Gal4*>*hpo*[RNAi] ovariole number and egg laying phenotypes (Sarikaya  
557 and Extavour, 2015) can be modified by further UAS:RNAi-mediated gene knockdown.



558 **Figure 2**

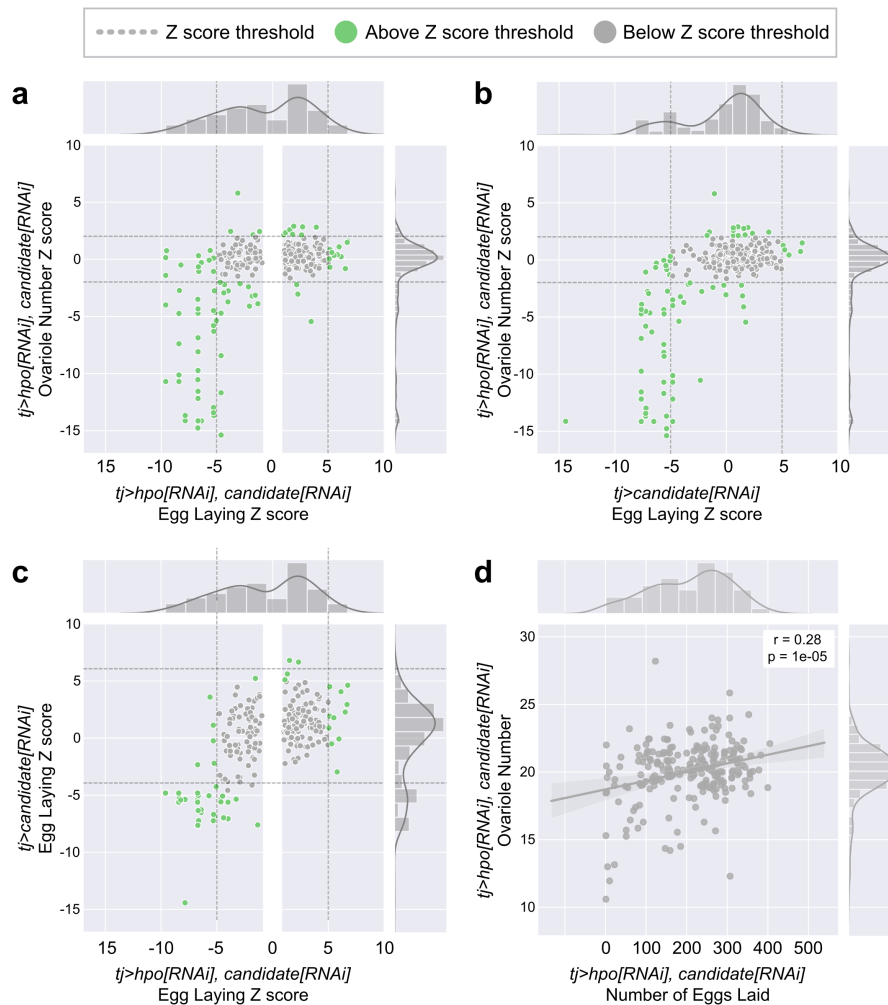

559  
560

561 **Figure 2. Relationship between Egg Laying and Ovariole Number phenotypes generated**  
 562 **in the screens. a)** Scatter plots of the Z score for each gene ( $Z_{gene}$ ) of egg laying versus the  
 563 ovariole number of adult *tj>hpo[RNAi], candidate[RNAi]* females. **b)** Scatter plots of the Z score  
 564 for each gene ( $Z_{gene}$ ) of egg laying of adult *tj>candidate[RNAi]* females versus the ovariole  
 565 number of adult *tj>hpo[RNAi], candidate[RNAi]* females. **c)** Scatter plots of the Z score for each  
 566 gene ( $Z_{gene}$ ) of egg laying of adult *tj>candidate[RNAi]* females versus egg laying of adult  
 567 *tj>hpo[RNAi], candidate[RNAi]* females. In **a**, **b** and **c**, bar graphs on the top and right sides of  
 568 each panel show the distribution of genes in each axis of the adjacent scatter plots. Green dots  
 569 = genes that meet the  $Z_{gene}$  threshold for the indicated phenotype. Grey dots = genes that do not  
 570 meet the  $Z_{gene}$  threshold for the indicated phenotype. Dark grey dotted lines = thresholds for  
 571 each phenotype:  $|Z_{gene}| > 5$  for Egg Laying and  $|Z_{gene}| > 2$  for Ovariole Number. In **a** and **c**,  
 572 the white vertical bar removes all genes in the *tj>hpo[RNAi], candidate[RNAi]* with a  $|Z_{gene}| < 1$  for  
 573 egg laying. These genes were not measured in the other two conditions and are therefore not  
 574 represented in the scatter plots. **d)** Correlation between non-zero Ovariole Number and Egg  
 575 Laying values.

576 Figure 3

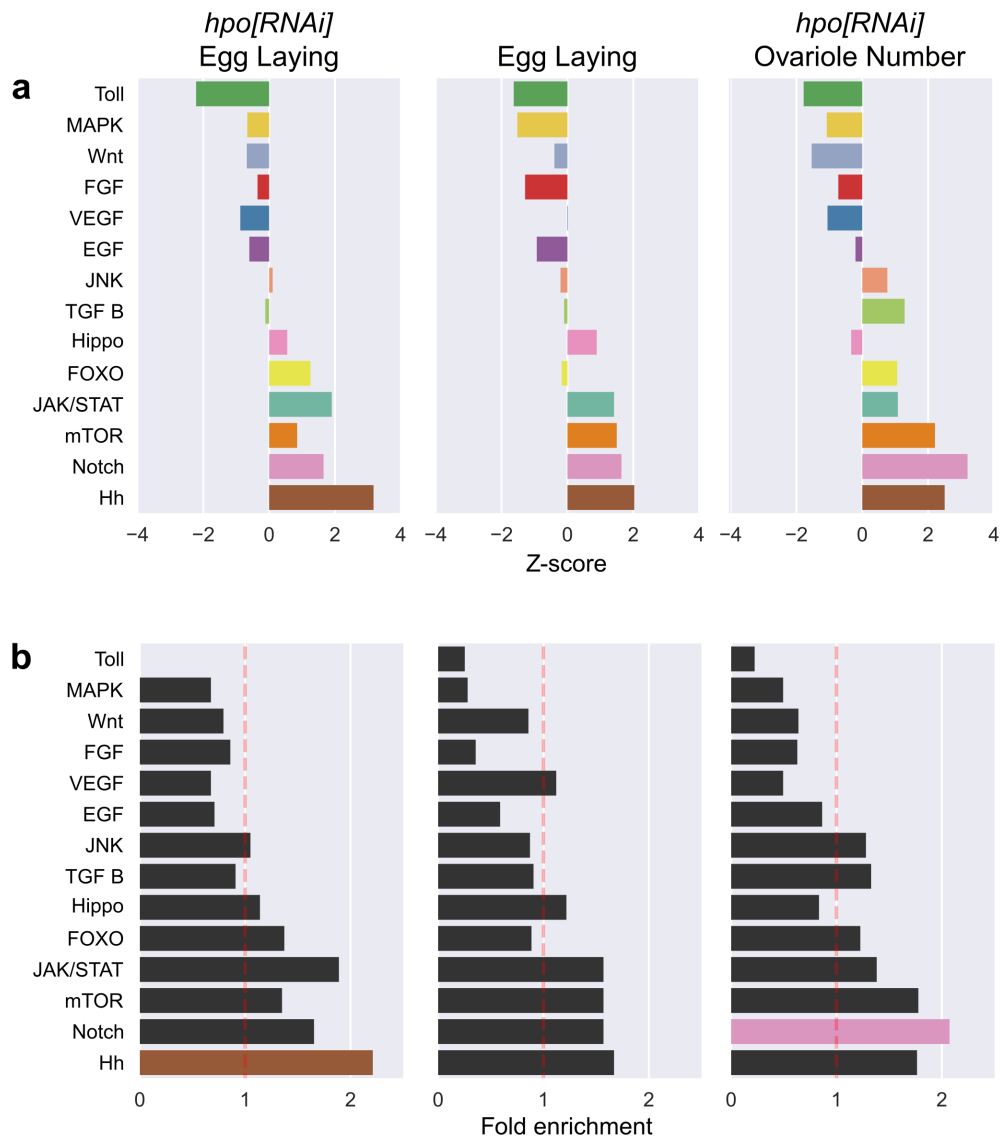

577

578

579

580

581

582

583

584

585

586

587

588

589

**Figure 3. Enrichment of genes of individual signalling pathways among the experimentally obtained positive candidates of each screen. a)** Depletion/enrichment analysis to identify over- or under- represented members of individual signalling pathways among positive candidates of each screen. Positive Z scores represent an enrichment, and negative Z scores represent depletion, of genes of a pathway among those genes that experimentally affected the phenotype. Enrichment and depletion are defined relative to a null distribution of the expected number of members of a signalling pathway among a group containing the same number of randomly selected signalling genes. **b)** Fold enrichment and hypergeometric p-value calculation to identify over- or under-representation of the genes of a pathway in each screen. Significantly enriched pathways (colored bars: brown = Hedgehog; pink = Notch) are defined by having a hypergeometric p-value less than 0.05.

590 **Figure 4**

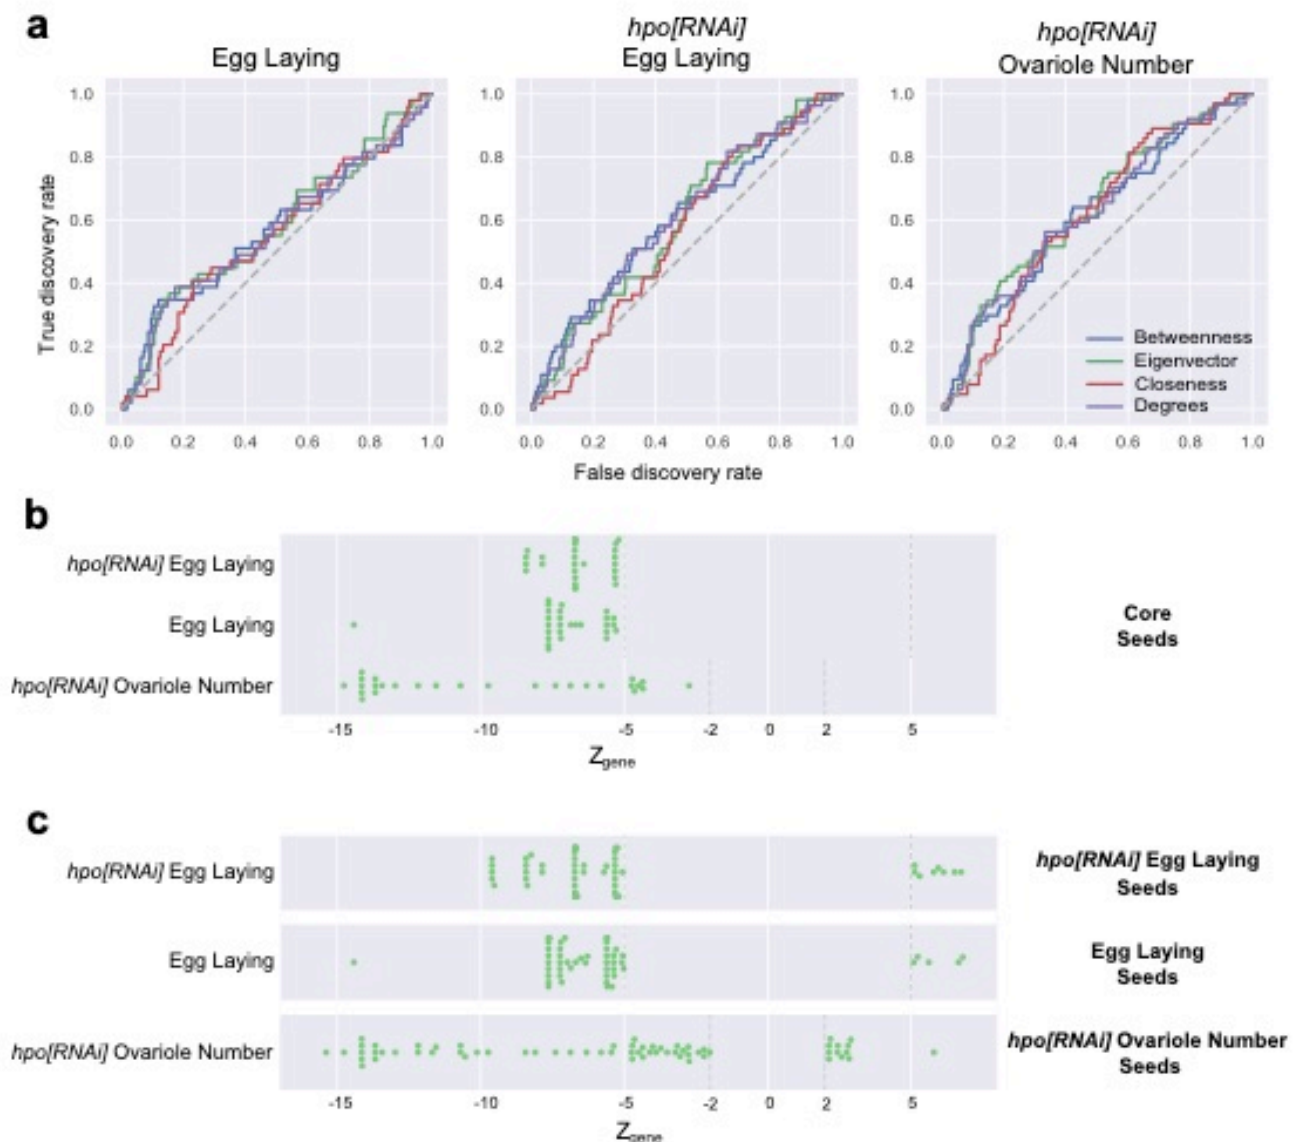

591  
592

593 **Figure 4. Screened genes function as a network. a)** Receiver operating characteristic (ROC)  
594 curves of genes ordered by rank for each of four network centrality metrics (Betweenness  
595 centrality, Eigenvector centrality, Closeness centrality and Degree centrality) versus a binary  
596 outcome (above or below  $Z$  score threshold) for each of the three screens. For each screen and  
597 metric, the Area Under the Curve (AUC) is  $> 0.5$  (Table S3). **b)** Genes whose  $|Z_{gene}|$  value was  
598 above the threshold (green dots; Table 2) in all three screens were assigned to the Core seed  
599 list. **c)** Genes whose  $|Z_{gene}|$  value was above the threshold (green dots; Table 2) in each screen  
600 were assigned to the corresponding seed list.



622 **Figure 6**

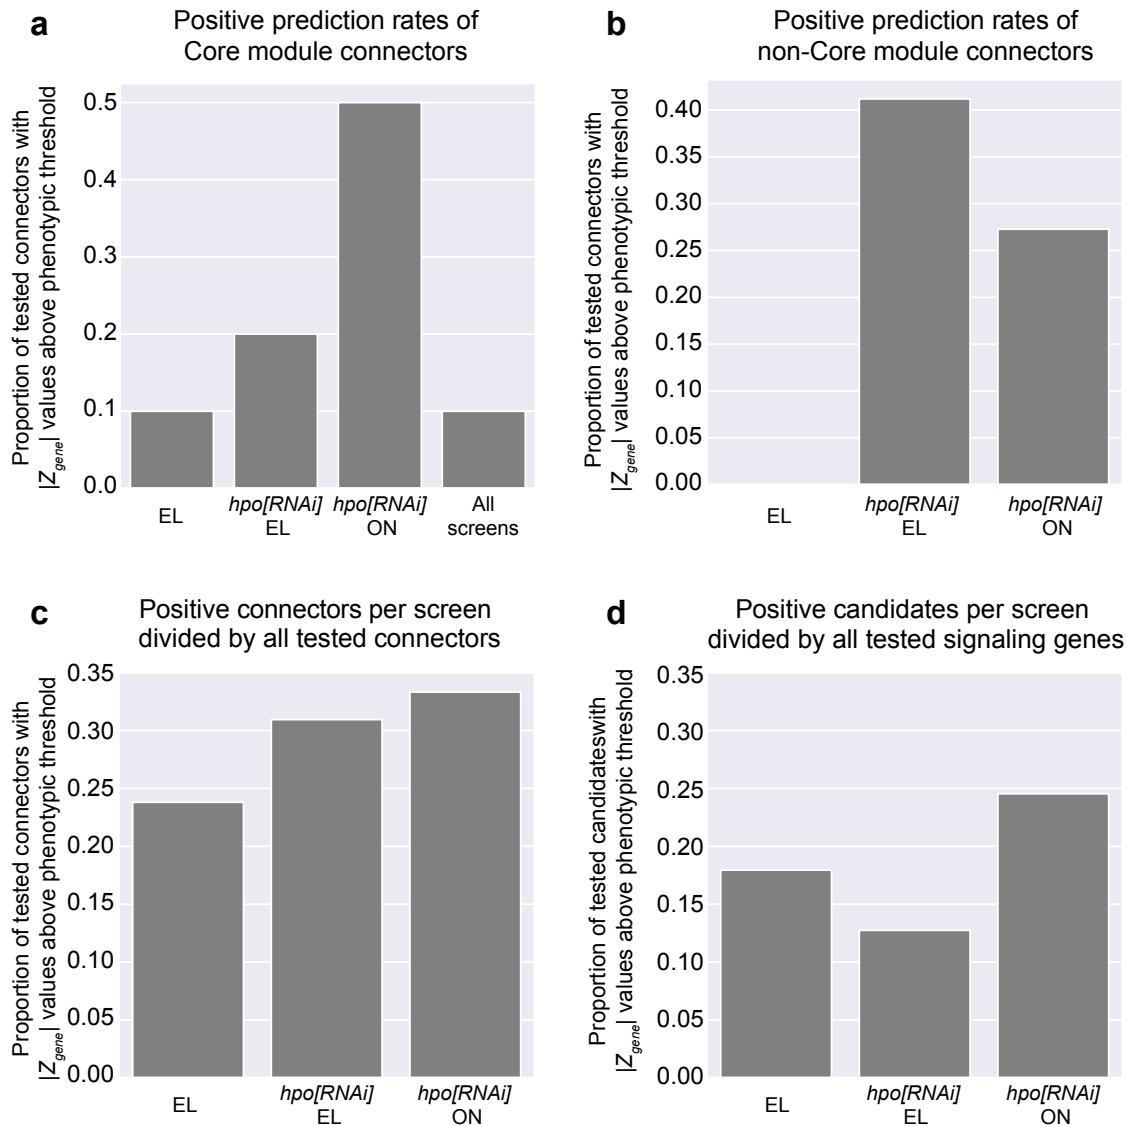

623

624

625 **Figure 6. Positive prediction rates of the connector genes in each of the four modules. a)**

626 Proportion of core module connector genes with  $|Z_{gene}|$  above the threshold in each of the three

627 screens. The “All phenotypes” category includes the genes with  $|Z_{gene}|$  above the threshold in all

628 three screens. **b)** Proportion of tested connector genes in each of the three modules with  $|Z_{gene}|$

629 above the threshold within their corresponding screen. **c)** Proportion of all unique connector

630 genes predicted by all four modules with  $|Z_{gene}|$  above the respective threshold in any of the

631 three screens. **d)** Proportion of positive candidate genes emerging from the three original

632 signalling candidate screens with  $|Z_{gene}|$  above the threshold relative to the total number of

633 genes tested in each screen.

634 Figure 7

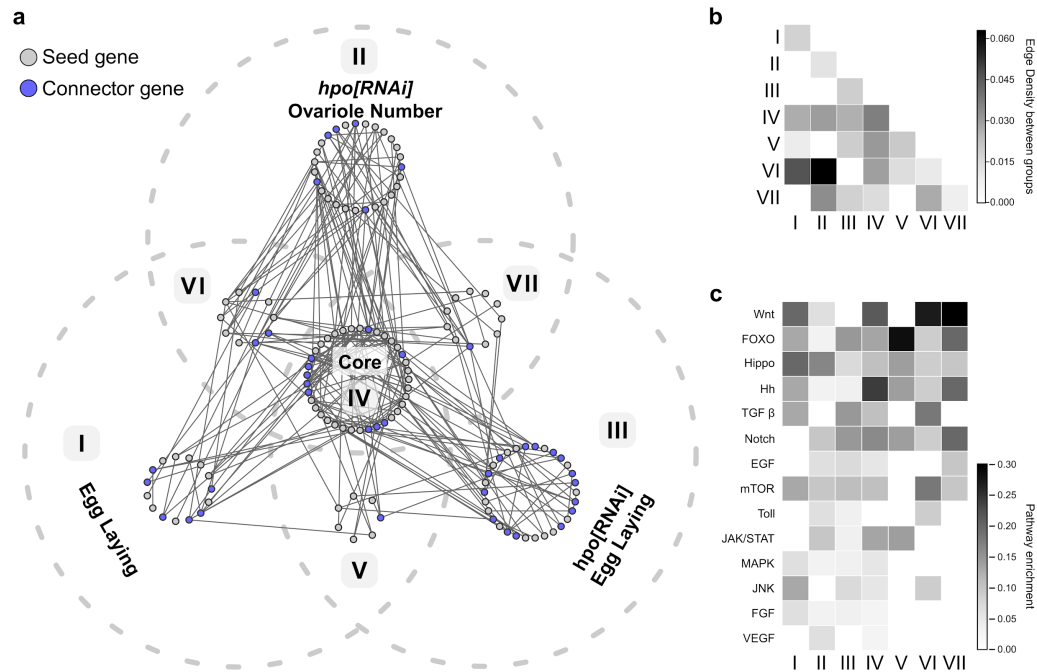

635  
 636  
 637 **Figure 7. Phenotypically separable sub-networks formed by analysis of the combined genes from all modules.** The meta  
 638 network is generated by the union of the genes in the four phenotypic modules: *hpo[RNAi]* Egg Laying (Figure S6a), Egg Laying  
 639 (Figure S6b), *hpo[RNAi]* Ovariole Number (Figure S6c) and Core (Figure 5b). **a)** The meta network is represented as a Venn  
 640 diagram, in which each grey dotted outline represents the screen in which a given gene was identified as affecting the scored  
 641 phenotype. Within each sub-network, grey circles indicate seed genes, and blue circles indicate connector genes. A single gene,  
 642 *sloppy paired 1*, was a seed in the Egg Laying module and also a connector in the *hpo[RNAi]* Egg Laying module; it fell within  
 643 sub-network VII in the meta network, and is marked as a seed (grey) in this figure. Solid grey lines indicate interactions between  
 644 genes in the meta network from the PPI. **b)** Edge densities between the seven sub-networks of the meta-network. **c)** Relative  
 645 enrichment of screened members of the 14 tested developmental signalling pathways within the seven sub-networks of the meta-  
 646 network.



647 **Figure S1**

**a. *hpo*[RNAi] Egg Laying**

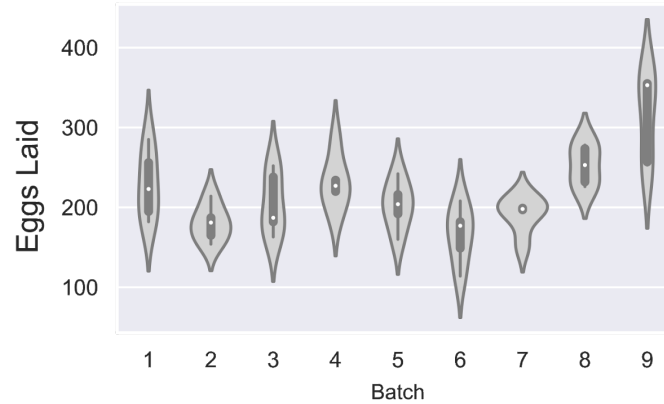

**b. Egg Laying**

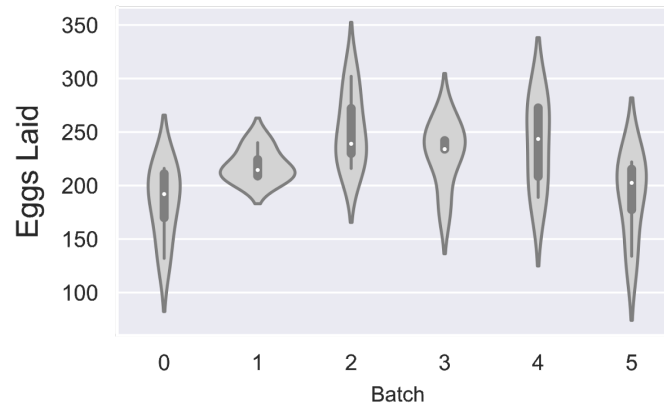

**c. *hpo*[RNAi] Ovariole Number**

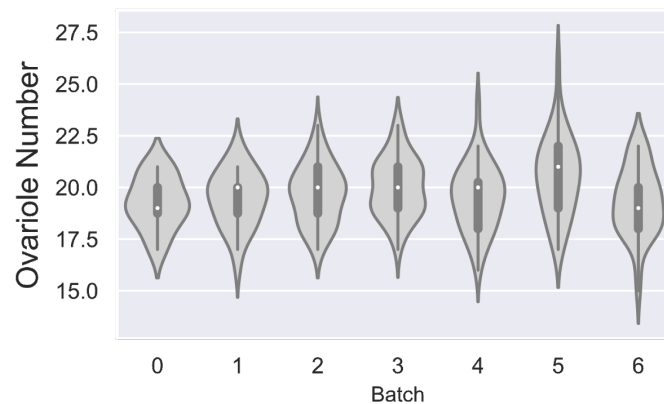

648

649

650 **Figure S1. Violin plots of egg laying and ovariole number of controls in each screen**

651 **batch. a)** Distribution of number of eggs laid by five replicates of three *tj:Gal4>hpo*[RNAi]

652 females over five days for each batch. **b)** Distribution of number of eggs laid by five replicates of

653 three *tj:Gal4* females over five days for each batch. **c)** Distribution of number of ovarioles per

654 ovary in 20 ovaries from ten *tj:Gal4>hpo*[RNAi] females in each batch.

655 **Figure S2**

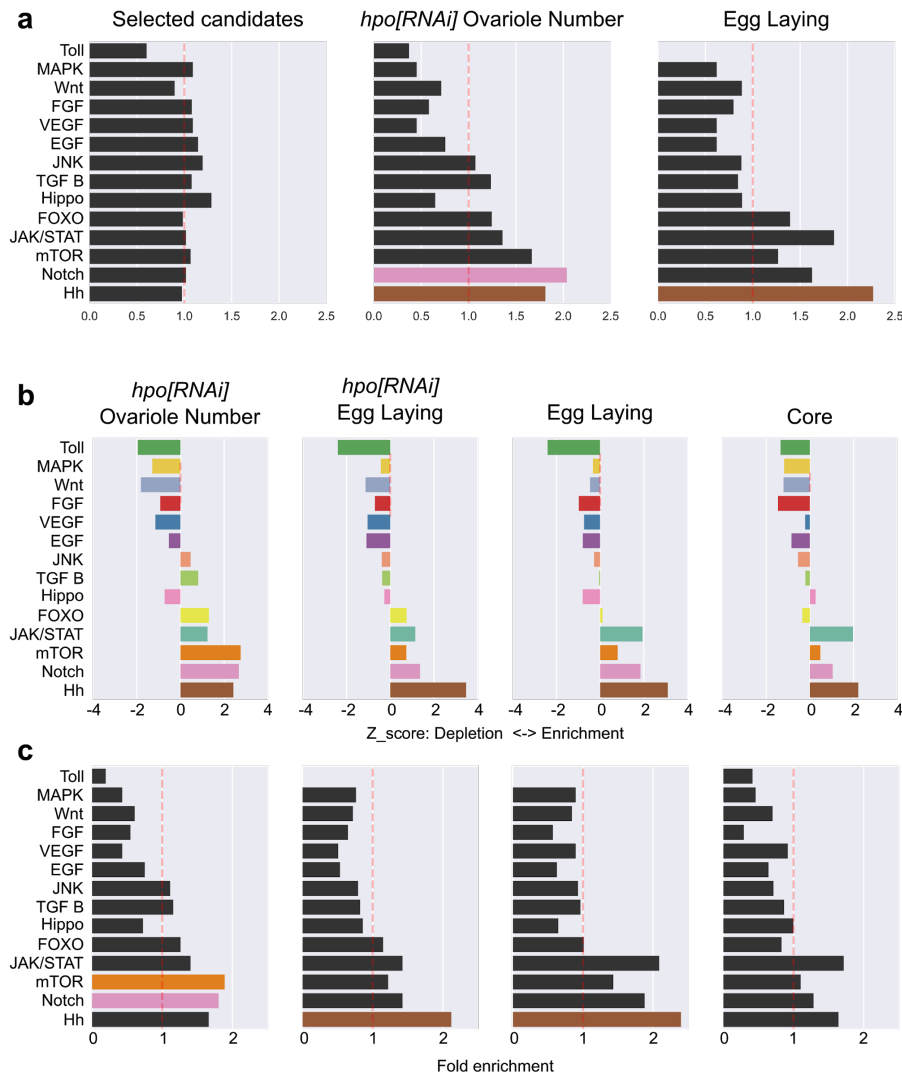

656  
657

**Figure S2. Biological aspects of the network modules. a)** Enrichment/depletion analysis of the 273 signalling pathway genes above the threshold  $|Z_{\text{gene}}| > 1$  (Figure 1a) against all signalling candidates. We also measured the enrichment/depletion of positive signalling candidate genes in the *hpo[RNAi]* Ovariole (Figure 1c) and Egg Laying (Figure 1b) screens from the 273 genes tested in those screens. **b)** Signalling pathway depletion/enrichment analysis. For each module, a null distribution of the expected number of members of a signalling pathway from a group of the same number of randomly selected signalling pathway genes was calculated. The Z score from the expected distribution was then calculated. Negative Z scores represent a depletion, while positive Z scores represent an enrichment. No single pathway is enriched in any of those modules. **c)** Fold enrichment and hypergeometric p-value calculation for each pathway in the four modules. Pathway members in color (orange = mTor; brown = Hedgehog; pink = Notch) have a p-value < 0.05.

670 Figure S3

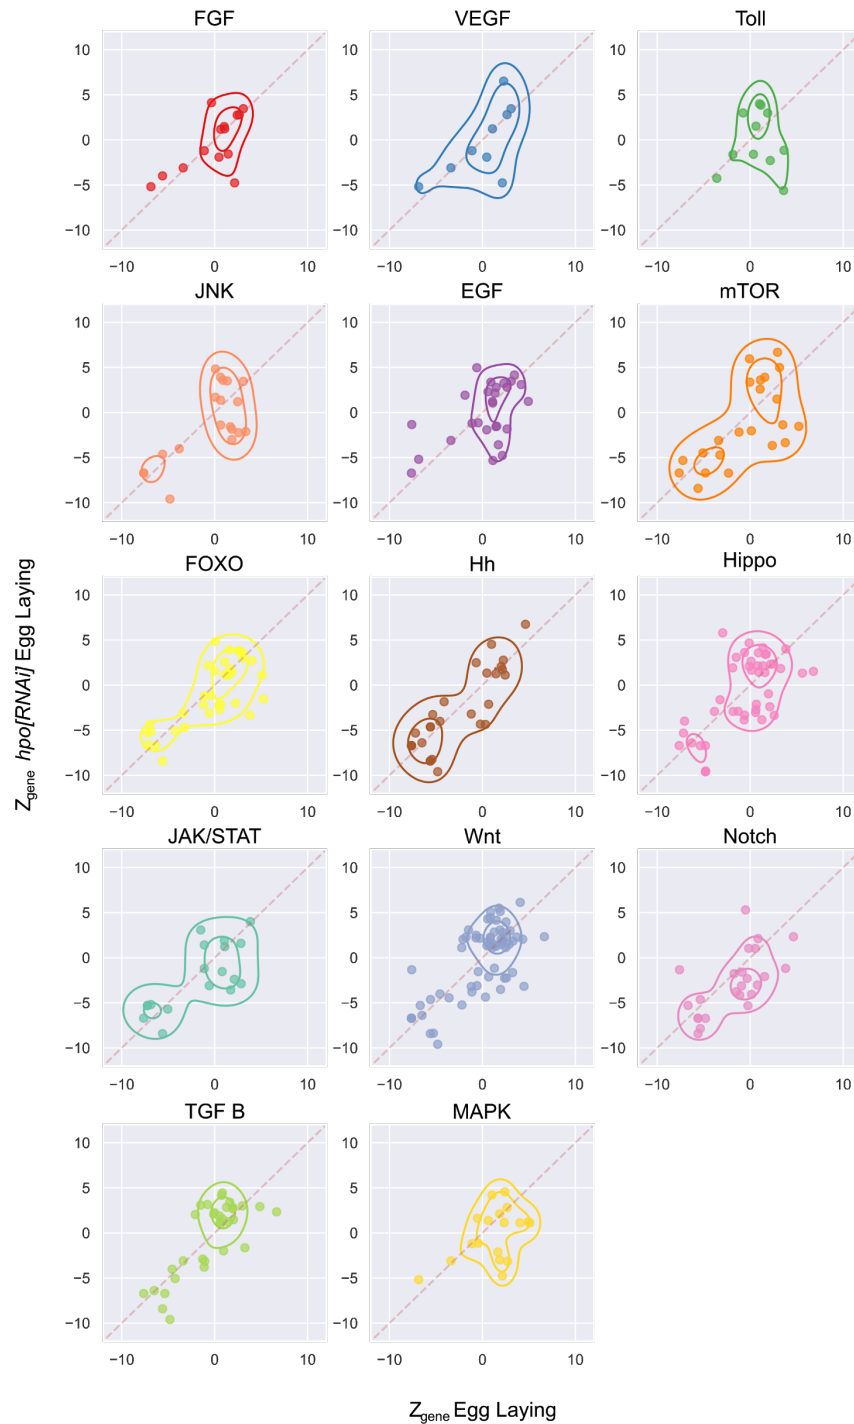

671  
672 **Figure S3. Comparison of egg laying candidate genes by pathway.**  $Z_{gene}$  of egg laying of  
673 adult females of *tj>hpo[RNAi], candidate[RNAi]* plotted against  $Z_{gene}$  of egg laying of  
674 *tj>candidate[RNAi]* adult females displayed by pathway. Contour plots indicate a 2D gaussian  
675 kernel density estimation.

676 Figure S4

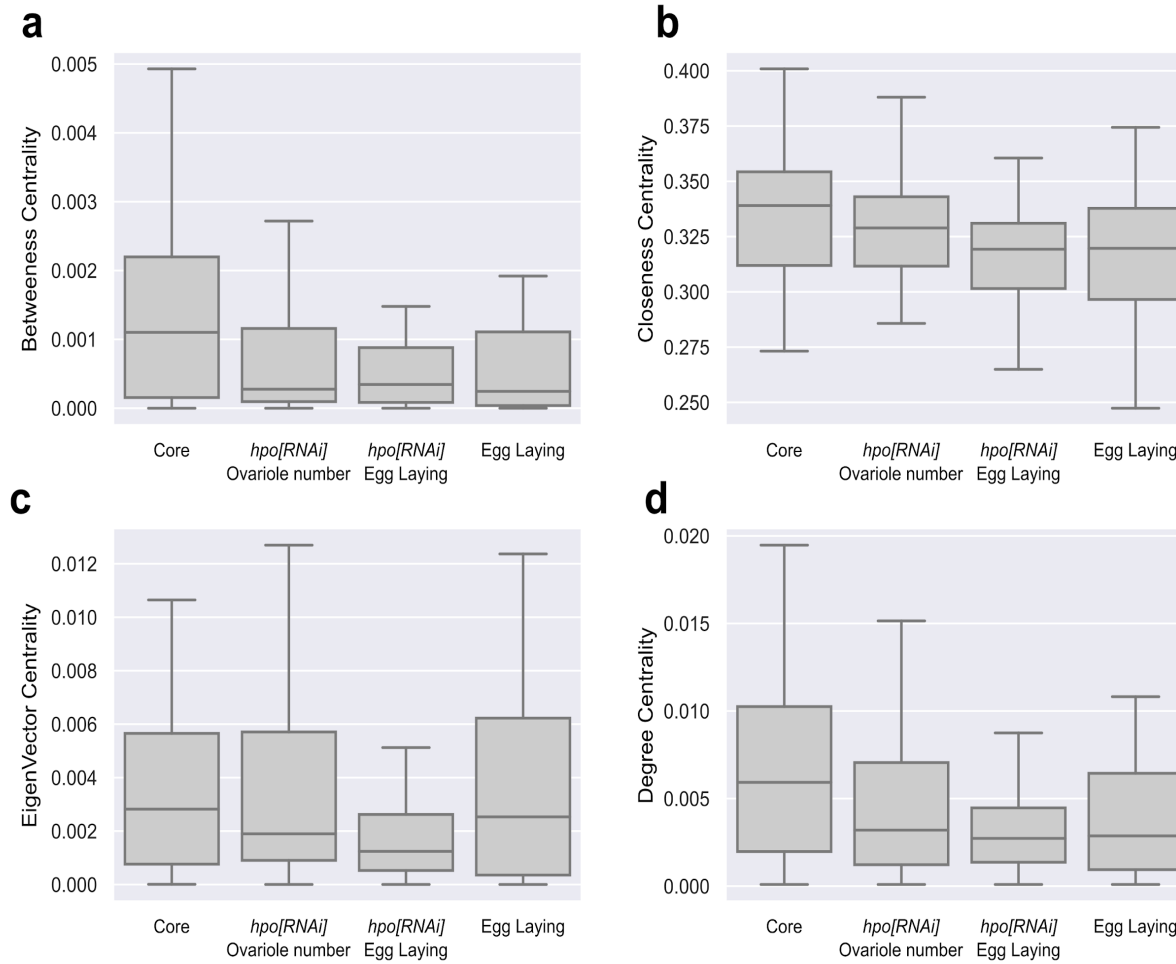

677

678 **Figure S4. Box plots of the four centrality measures calculated for the genes in each of the four phenotypic modules. See**  
679 **modules in Figures 5 and S6.**

680

681 Figure S5

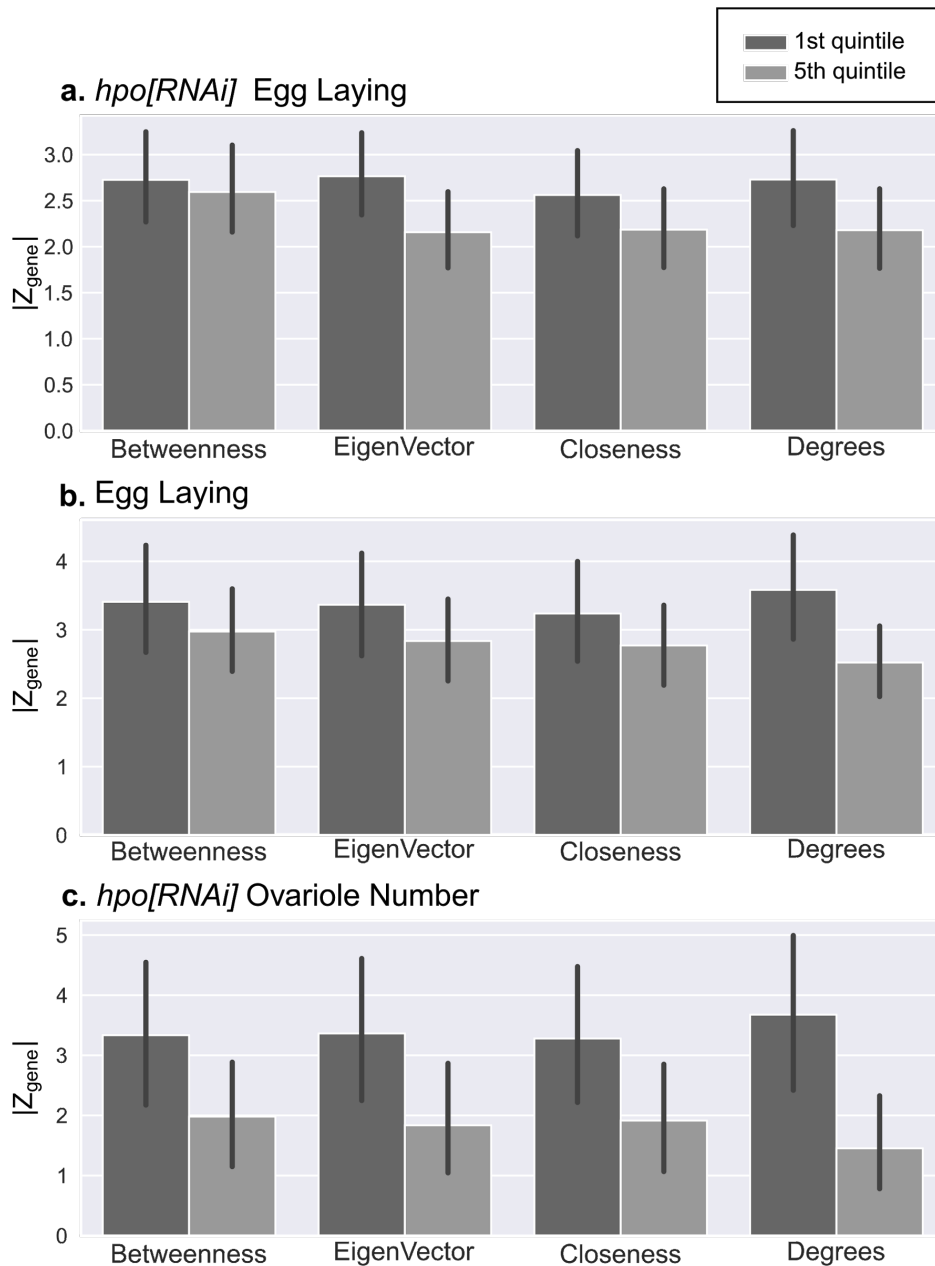

682

683

684 **Figure S5. Comparisons of the  $Z_{gene}$  scores of the positive candidate genes sorted by**  
685 **centrality metrics.** In each screen (a, b, c), the  $|Z_{gene}|$  values of the first (dark grey) and fifth  
686 (light grey) quintiles of positive candidate genes ordered by rank for each of the four chosen  
687 centrality metrics, are plotted as a bar plot. Bars indicate standard error.

688 Figure S6

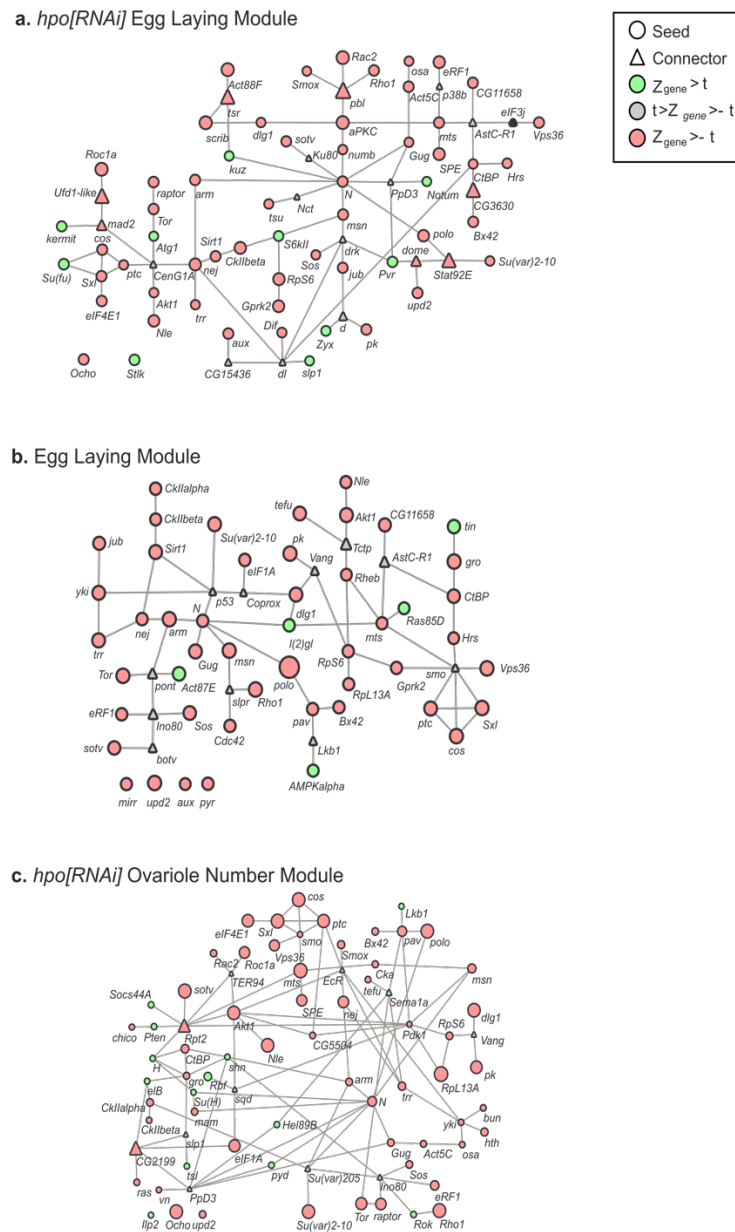

689

690 **Figure S6. Three modules generated by the Seed Connector Algorithm (SCA). a)**  
 691 ***hpo[RNAi]* Egg Laying Module b) Egg Laying Module c) *hpo[RNAi]* Ovariole Number Module.**  
 692 The size of the shapes indicate the  $Z_{gene}$  score of the gene. Circles = seed genes; triangles =  
 693 connector genes. Green = genes with a positive  $Z_{gene}$  above the threshold. Red = genes with a  
 694 negative  $Z_{gene}$  above threshold. Grey = genes with  $Z_{gene}$  values below the threshold. All  
 695 connectors were phenotypically tested (Table S1) except *eukaryotic translation initiation factor 3*  
 696 *subunit j (eIF3J)*, in the *hpo[RNAi]* Egg Laying Module (black triangle), for which no RNAi stock  
 697 as available at the time of testing.

698 **Figure S7**

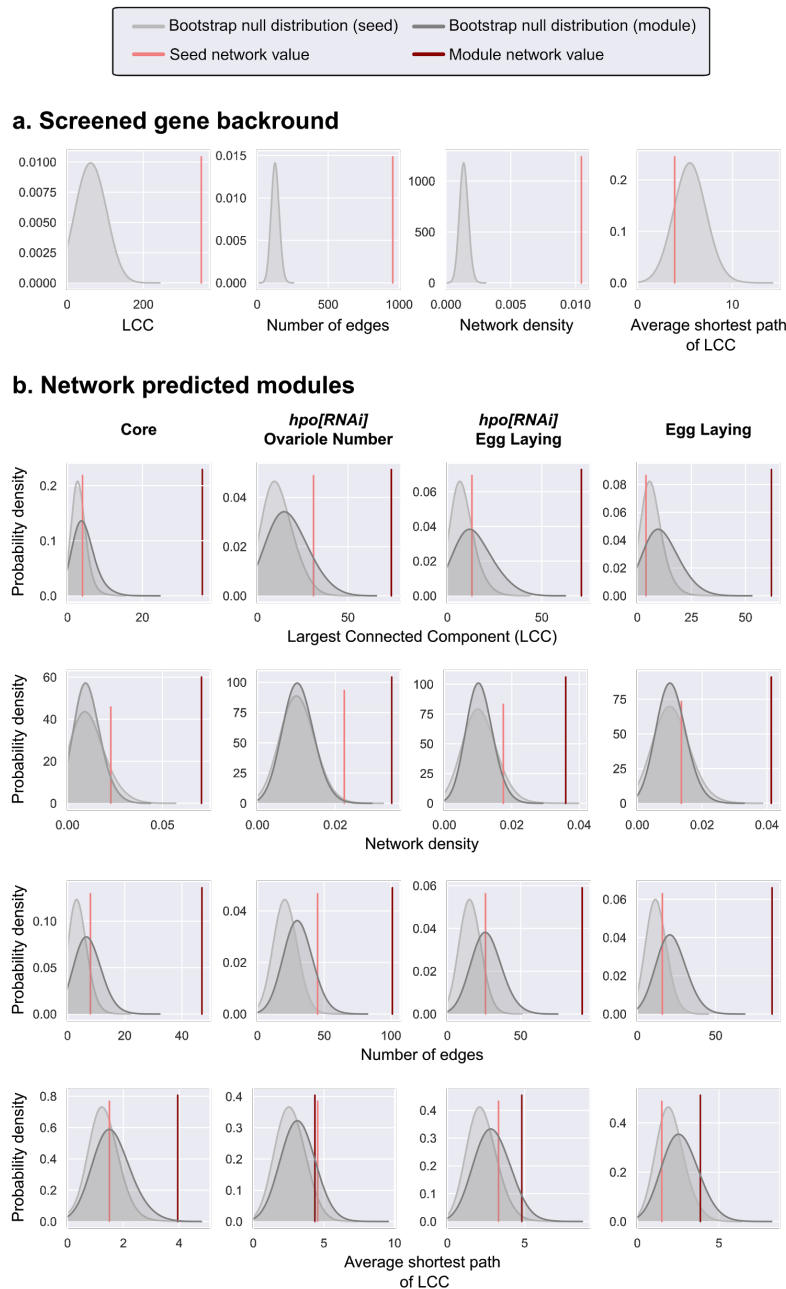

699 **Figure S7. Comparison of network metrics before (Seed Network) and after (Module**  
 700 **Network) application of the seed connector algorithm. a)** Comparison of network metrics of  
 701 **all screened genes (red line) to a null distribution of network metrics derived by bootstrapping an**  
 702 **equal number of randomly selected genes in the PPI (grey curve). b)** Comparisons of the  
 703 **Largest Connected Component (LCC), network density, number of edges and average shortest**  
 704 **path between the seed network (light red line) and the module network (dark red line). The**  
 705 **bootstrapped null distribution (1000 bootstraps) of both the seed network (light grey curve) and**  
 706 **the module network (dark grey curve) are indicated..**  
 707



## 708 Supplementary tables

### 709 Table S1

710 **Table S1: Tabulation of raw data and analysis for every gene in the screen.**

711 [https://github.com/extavourlab/hpo\\_ova\\_eggL\\_screen/blob/master/Results/MasterTable.c](https://github.com/extavourlab/hpo_ova_eggL_screen/blob/master/Results/MasterTable.csv)  
712 [sv](https://github.com/extavourlab/hpo_ova_eggL_screen/blob/master/Results/MasterTable.csv).

713  
714 This table contains a summary representation of the data generated by the three screens as  
715 well as results from the analysis. Each line corresponds to an independent measurement of a  
716 particular RNAi line. Some genes which did not pass the first filter of  $|Z_{\text{gene}}| > 1$  in the *hpo*[RNAi]  
717 Egg Laying screen were then predicted as connectors, therefore they have two entries as they  
718 have been independently measured again. The Z scores have been rounded up to 4 significant  
719 digits in this table and the Centrality metrics rounded up to 10 significant digits due to their low  
720 values, but the full values for both are available in the raw data files provided in the  
721 supplementary files in Data/Screens for the Z scores and Results for the centrality values.  
722 Moreover this is a summary table and does not contain values for controls as well as batch  
723 numbers, all are available in the supplementary files in Data/Screens.

724  
725 - **FbID**: FlyBase ID of the tested gene.  
726 - **CG number**: CG Number of the tested gene.  
727 - **NAME**: Common name (as per FlyBase nomenclature) of the gene if existing, else it is a -.  
728 - **SYMBOL**: Symbol (as per FlyBase nomenclature) of the gene if existing, else CG number  
729 - **[ScreenName]\_[Variable]\_(Metric)\_Count**: Within the screen [ScreenName], the count of the  
730 measured variable [Variable]. Optional: (*metric*) will indicate if a particular operation was done  
731 over the data, such as sum, mean or standard deviation.  
732 e.g. [HippoRNAi\_EggL]\_[Day\_4\_Egg]\_Count is the count of eggs, on day 4, of the *hpo*[RNAi]  
733 Egg Laying screen.  
734 - **[ScreenName]\_[Variable]\_(Metric)\_Zscore**: Within the screen [ScreenName], the Z score of  
735 the measured variable [Variable] as calculated to batch control. Optional: (*metric*) will indicate if  
736 a particular operation was done over the data, such as sum, mean or standard deviation.  
737 e.g. [EggL]\_[All\_Days\_Egg]\_(Sum)\_Zscore is the Z score of the sum of eggs count, of the Egg  
738 Laying screen.  
739 - **PPI\_[Metric]\_centrality**: Within the PPI used in this paper, the calculated centrality value for  
740 the metric [Metric].  
741 - **[ModuleName]\_Network**: Presence of absence of a gene in the module [ModuleName]. If the  
742 gene is in the module, this value is True, if it is absent it is False. (An exception is made for the  
743 Meta Network displayed in Figure 7 where instead of True/False, the group assignment I-VII is  
744 written)  
745 - **[ModuleName]\_Connector**: Status of a gene in the module [ModuleName] as a connector. If  
746 True, the gene is a connector, else if False, the gene is not a connector.  
747 - **[PathwayName]\_Pathway**: Participation of a gene to the signalling pathway [PathwayName].  
748 If the gene participates in the pathway the value is 1, else it is 0.

749 **Table S2**

| <b>FbID</b> | <b>CG Number</b> | <b>Name</b>                                    | <b>Symbol</b>       |
|-------------|------------------|------------------------------------------------|---------------------|
| FBgn0283468 | CG3412           | <i>supernumerary limbs</i>                     | <i>slmb</i>         |
| FBgn0267821 | CG5102           | <i>daughterless</i>                            | <i>da</i>           |
| FBgn0266724 | CG5161           | <i>TRAPP subunit 20</i>                        | <i>Trs20</i>        |
| FBgn0267378 | CG7085           | <i>sauron</i>                                  | <i>sau</i>          |
| FBgn0267487 | CG9181           | <i>Protein tyrosine phosphatase 61F</i>        | <i>Ptp61F</i>       |
| FBgn0267912 | CG9819           | <i>Calcineurin A at 14F</i>                    | <i>CanA-14F</i>     |
| FBgn0086371 | CG9829           | <i>poly</i>                                    | <i>poly</i>         |
| FBgn0267350 | CG10260          | <i>Phosphatidylinositol 4-kinase III alpha</i> | <i>PI4KIIIalpha</i> |
| FBgn0267698 | CG10295          | <i>p21-activated kinase</i>                    | <i>Pak</i>          |
| FBgn0283462 | CG18279          | <i>Immune induced molecule prepropeptide</i>   | <i>IMPPP</i>        |
| FBgn0267339 | CG33338          | <i>p38c MAP kinase</i>                         | <i>p38c</i>         |
| FBgn0085506 | CG40635          | -                                              | <i>CG40635</i>      |

750

751 **Table S2. 12 signalling candidate genes with no available RNAi lines at either BDSC or**  
752 **VDRC at the time of this study.**

753

754 **Table S3**

755

| <b>Centrality metric</b> | <b><i>hpo[RNAi]</i><br/>Ovariole Number</b> | <b><i>hpo[RNAi]</i> Egg<br/>Laying</b> | <b>Egg Laying</b> |
|--------------------------|---------------------------------------------|----------------------------------------|-------------------|
| Betweenness              | 0.603                                       | 0.57                                   | 0.586             |
| EigenVector              | 0.632                                       | 0.573                                  | 0.586             |
| Closeness                | 0.612                                       | 0.551                                  | 0.588             |
| Degrees                  | 0.615                                       | 0.592                                  | 0.599             |

756

757 **Table S3: Area under the curve (AUC) of ROC curves.** AUC values for the ROC curves for  
758 each centrality measure for the three screens (Figure 4a). AUC values range from 0 to 1. A  
759 score above 0.5 indicates a positive correlation between the continuous variable (centrality) and  
760 the binary variable (above or below the Z score threshold). A score of 0.5 or less indicates no  
761 correlation between the variables.

762 Table S4

763

| Module                           | Number of Seeds | Number of Connectors | Number of connector genes above $ Z_{gene} $ threshold within module phenotype |
|----------------------------------|-----------------|----------------------|--------------------------------------------------------------------------------|
| <i>hpo[RNAi]</i> Egg Laying      | 58              | 18                   | 7 (41.2%)                                                                      |
| Core                             | 27              | 10                   | 1 (10.0%)                                                                      |
| Egg Laying                       | 49              | 11                   | 0 (0.0%)                                                                       |
| <i>hpo[RNAi]</i> Ovariole Number | 66              | 11                   | 3 (27.3%)                                                                      |

764

765 **Table S4. Distribution of seed genes and connectors in each module.** Two genes that were  
766 above  $|Z_{gene}|$  threshold (Table 2) in the *hpo[RNAi]* Egg Laying (CG12147) and *hpo[RNAi]*  
767 Ovariole Number seed list (CG6104) were not found in the PPI, and therefore not included in  
768 the network analysis or in this table (see methods for details). The removal of these two genes  
769 accounts for the difference between the number of positive candidates in Table 2 and the  
770 number of seed genes in these two modules (Table S1 and S4). The proportion of connectors  
771 whose loss of function produced a significant phenotype ( $|Z_{gene}|$  above threshold) is in  
772 parentheses and plotted in Figure 6a, 6b). All connectors except *eukaryotic translation initiation*  
773 *factor 3 subunit j (eIF3J)* in the *hpo[RNAi]* Egg Laying Module, for which no RNAi line was  
774 available at the time of testing, were tested. Therefore, the percentages of connectors above the  
775 threshold for the *hpo[RNAi]* Egg Laying Module were calculated out of 17 connectors.

776 Table S5

777

| Total number of unique connectors in all four modules | Number of connector genes above $ Z_{gene} $ threshold |                                           |                                                |
|-------------------------------------------------------|--------------------------------------------------------|-------------------------------------------|------------------------------------------------|
|                                                       | For Egg Laying Phenotype                               | For <i>hpo[RNAi]</i> Egg Laying Phenotype | For <i>hpo[RNAi]</i> Ovariole Number Phenotype |
| 43                                                    | 10 (23.8%)                                             | 13 (31.0%)                                | 14 (33.3%)                                     |

778

779 **Table S5. Number of unique connector genes above  $|Z_{gene}|$  threshold for the three**  
780 **phenotypic measurements.** Percentage of the number of connectors above threshold for each  
781 phenotype from the total number of connectors is in parentheses and plotted in Figure 6c. All  
782 connectors except *eukaryotic translation initiation factor 3 subunit j (eIF3J)* in the *hpo[RNAi]* Egg  
783 Laying Module, for which no RNAi line was available at the time of testing, were tested.  
784 Therefore, the percentages of connectors above the threshold were calculated out of 42 unique  
785 connectors.

786

## 787 Methods

### 788 LEAD CONTACT AND MATERIALS AVAILABILITY

789 This study did not generate new unique reagents. This study generated new python3 code  
790 available on GitHub: [https://github.com/extavourlab/hpo\\_ova\\_eggL\\_screen](https://github.com/extavourlab/hpo_ova_eggL_screen).

791  
792 Further information and requests for resources and reagents should be directed to and will be  
793 fulfilled by the Lead Contact, Cassandra G. Extavour ([extavour@oeb.harvard.edu](mailto:extavour@oeb.harvard.edu)).

### 794 EXPERIMENTAL MODEL AND SUBJECT DETAILS

795 Wild type and mutant lines of *Drosophila melanogaster* were obtained from publicly accessible  
796 stock centers and maintained as described in “Fly Stocks” below. Genotypes and provenance  
797 are provided in the Key Resource Table. Candidate genes were randomly assigned to batches  
798 for screening (see Table S1 for which genes were in each batch). F1 animals from the same  
799 cross were randomly assigned to experimental groups for phenotyping in all screens.

## 800 METHOD DETAILS

### 801 Fly stocks

802 Flies were reared at 25°C at 60% humidity with standard *Drosophila* food (Sarikaya et al., 2012)  
803 containing yeast and in uncrowded conditions as previously defined (Sarikaya and Extavour,  
804 2015). RNAi lines were obtained from the TRiP RNAi collection at the Bloomington *Drosophila*  
805 Stock Centre (BDSC) and from the Vienna *Drosophila* Resource Centre (VDRC). See Key  
806 Resources Table for complete list of stocks used in this study. Oregon R was used as a wild  
807 type strain. The genotype of the *traffic jam:Gal4* line used in the screen was *y w; P{w[+mW.hs]*  
808 *= GawB}NP1624* (Kyoto Stock Center, K104–055; abbreviated hereafter as *tj:Gal4*). The *hippo*  
809 RNAi line used in the screen was *y[1] v[1]; P{y[+t7.7]v[+t1.8]=TRiP. HMS00006}attP2*  
810 (BDSC:33614; abbreviated hereafter as *hpo[RNAi]*).

### 811 Egg and ovariole number counts

812 Adult egg laying was quantified by crossing three virgin females of the desired genotype (see  
813 “Screen design” below) with two males in a vial containing standard food and yeast granules  
814 (day one) and then transferring them into a fresh food vial without yeast granules for a 24 hour  
815 period. Eggs from vials were then counted by visual inspection of the surface of the food in the  
816 vial. Males and females were transferred to fresh food vials without yeast granules, every day  
817 thereafter until day six. All egg laying measurements reported and analysed in the paper are the  
818 sum of the eggs laid by three adult female flies over the five days of this assay (days two

819 through six without yeast granules). Data from any vial in which either a female or male died,  
820 during the course of the experiment, were not included in the analysis.

821  
822 Ovariole number was quantified by mating ten virgin adult females with five virgin adult Oregon  
823 R males for three days post eclosion in vials with yeast at 25°C and 60% humidity. After this  
824 three-day mating period, all 20 adult ovaries from the mated females were dissected in 1X PBS  
825 with 0.1% Triton-X-100 and stained with 1ug/ml Hoechst 33321 (1:10,000 of a 10mg/ml stock  
826 solution). Ovarioles were separated from each other with No. 5 forceps (Fine Science Tools)  
827 and counted by counting the number of germaria under a ZEISS Stemi 305 compact stereo  
828 microscope with a NIGHTSEA stereo microscope UV Fluorescence adaptor.

## 829 Screen design

830 In the primary screen (Figure 1a: *hpo[RNAi]* Egg Laying), 463 candidate genes (Table S1) were  
831 screened for the effect of an RNAi-induced loss of gene function in a *hpo[RNAi]* background on  
832 the number of eggs laid in the first five days of mating (see “Egg and ovariole number counts”  
833 above) by adult females. These females were the F1 offspring of UAS:*candidate gene* RNAi  
834 males crossed to  $P\{w[+mW.hs] = GawB\}NP1624; P\{y[+t7.7] v[+t1.8]=TRiP.HMS00006\}attP2$   
835 (*tj:Gal4; UAS:hpo[RNAi]*) virgin adult females (Figure 1a: *hpo[RNAi]* Egg Laying). All genes that  
836 yielded an egg laying count with a  $|Z_{gene}| > 1$  (see “Gene selection based on Z score and batch  
837 standardization” below) were selected to undergo two secondary screenings (n=273, Table 2,  
838 Figure 1d). First, these genes were screened for effects on the egg laying of mated adult female  
839 offspring from a cross of UAS:*candidate gene[RNAi]* males and *tj:Gal4* virgin adult females  
840 (Figure 1b: Egg Laying). Secondly, these genes were screened for effects on ovariole number in  
841 a *hpo[RNAi]* background. All 20 ovaries from ten adult female F1 offspring of a cross between  
842 UAS:*candidate gene[RNAi]* males to  $P\{w[+mW.hs] = GawB\}NP1624; P\{y[+t7.7]$   
843  $v[+t1.8]=TRiP.HMS00006\}attP2$  (*tj:Gal4; UAS:hpo[RNAi]*) virgin adult females were scored for  
844 ovariole number (see “Egg and ovariole number counts” above). (Figure 1c: *hpo[RNAi]* Ovariole  
845 Number).

## 846 Gene selection based on Z score and batch standardization

847 Candidate genes were screened in batches with an average size of 50 genes. For each batch,  
848 control flies were the female F1 offspring of Oregon R males crossed to  $P\{w[+mW.hs] =$   
849  $GawB\}NP1624; P\{y[+t7.7] v[+t1.8]=TRiP.HMS00006\}attP2$  (*tj:Gal4; UAS:hpo[RNAi]*) virgin adult  
850 females. Because the control group in each batch had slightly different distributions of egg  
851 laying and ovariole number values (Figure S1), it was inappropriate to compare absolute mean  
852 values between genes that were scored in different batches. Instead, comparisons of the Z  
853 score of each candidate ( $Z_{gene}$ ) to its batch control group was used as a discriminant. This  
854 approach standardizes for batch effects and allows the comparison of all genotypes within and  
855 across the primary and secondary screens with a single metric ( $Z_{gene}$ ).

856  
857 Firstly, the mean and standard deviation of the eggs laid by the control genotype for a batch  
858 were calculated as  $\mu_b$  and  $\sigma_b$  respectively. Then, using the number of eggs laid by adult females



859 of a candidate gene RNAi ( $x_{gene}$ ) of the same batch, the Z score for the egg laying count of that  
860 gene ( $Z_{gene}$ ) was calculated as  $Z_{gene} = \frac{x_{gene} - \mu_b}{\sigma_b}$ . The same standardization protocol was  
861 applied to both egg laying and ovariole number counts of every gene and its corresponding  
862 batch control.

863  
864 Ovariole numbers were derived from counts of the number of ovarioles per ovary for 20 ovaries  
865 per candidate gene, and a threshold of  $|Z_{gene}| > 2$  (corresponding to a false positive probability  
866 less than 0.045) was applied for ovariole number phenotype. Egg laying counts were derived  
867 from measurements of three females in a single vial per gene. We therefore chose to be more  
868 conservative in our Z score comparisons for the egg laying phenotype, than for ovariole number  
869 phenotype, and applied a stringent threshold of  $|Z_{gene}| > 5$  (corresponding to a false positive  
870 probability less than 0.00006) to select genes of interest. All genes with  $|Z_{gene}|$  values above  
871 these thresholds are referred to throughout the study as “positive candidates”. (See Ipython  
872 notebooks 02\_Z\_score\_calculation.ipynb and 02.2\_Z\_score\_calculation\_prediction.ipynb for  
873 code implementation and calculation of Z scores, and 06\_Screen Analysis.ipynb for batch  
874 effects.)

## 875 Signaling pathway enrichment analysis

876 To study the enrichment of a particular signaling pathway in a group of candidate genes that  
877 had similar phenotypic effects revealed by the screen, custom scripts (see  
878 07\_Signaling\_pathway\_analysis.ipynb for code implementation) were generated to implement  
879 two different methods (Figure 3a, 3b; Figure S52a-c).

880  
881 The first method is a numerical method that uses bootstrapping to calculate the null distribution  
882 of the number of members (M) of a signaling pathway (S) that would be expected at random in a  
883 set of genes of size (N). The script randomly sampled N genes from among the 463 tested *D.*  
884 *melanogaster* signaling genes 10,000 times, and counted the number of genes (M) that were  
885 members of the signaling pathway S. Positive candidates in each of the three screens were  
886 sorted by their presence in signalling pathways and counted. The Z score was then calculated  
887 by comparing the experimentally observed number of positive candidates in each signaling  
888 pathway against the bootstrapped null distribution.

889  
890 The second method used the hypergeometric p-value to calculate the probability of M members  
891 of a signaling pathway being in a group of N genes, given a starting population of 463 tested *D.*  
892 *melanogaster* signaling genes, and the known attribution to a pathway S of each gene.

## 893 Protein-Protein Interaction Network (PPI) building

894 There is no standard complete Protein-Protein Interaction (PPI) network available for *Drosophila*  
895 *melanogaster*. However, there exist many smaller networks from different screens, as well as  
896 literature extractions. We therefore combined data from these sources and then created a PPI  
897 for use in the present study, as follows:

898

899 **Step 1:** Several screens assessing protein-protein interactions have been centralized in a  
900 database called Droid: <http://www.droidb.org>. The version Droid\_v2018\_08 was used. All  
901 available datasets were first downloaded from that database using this link:  
902 <http://www.droidb.org/Downloads.jsp>. The description of all of these datasets can be found here:  
903 <http://www.droidb.org/DBdescription.jsp>

904

905 **Step 2:** We used the datasets from all screens that assessed direct protein-protein interactions  
906 and did not use the interolog database (predicted protein interaction based on mouse human  
907 and yeast PPI). These direct assessment screens were seven in total, as follows:

908

- 909 ○ [Finley Yeast Two-Hybrid Data](#) (size 2.0 MB)
- 910 ○ [Curagen Yeast Two-Hybrid Data](#) (size 4.6 MB)
- 911 ○ [Hybrigenics Yeast Two-Hybrid Data](#) (size 381 KB)
- 912 ○ [Perrimon co-AP complex](#) (size 108 KB)
- 913 ○ [DPiM co-AP complex](#) (size 6.3 MB)
- 914 ○ [PPI from other databases](#) (size 16.2 MB)
- 915 ○ [PPI curated by FlyBase](#) (size 7.4 MB)

916

917 An important element to note is that the PPI curated by FlyBase is a literature-based PPI.  
918 FlyBase protein-protein interactions are experimentally derived physical interactions curated  
919 from the literature by FlyBase, and does not include FlyBase-curated genetic interactions.

920

921 **Step 3:** We concatenated the seven datasets listed above into a single unique database. A  
922 custom python script was created that downloads and reads each of the above seven unique  
923 PPI tables, and generates a single PPI network. From this concatenation, a single edge  
924 undirected network was created and saved. This network is hereafter referred to as **the PPI**  
925 (see 01\_PPI\_builder.ipynb).

## 926 Network metric computations

927 The centrality of a node is often used as a measure of a node's importance in a network. Within  
928 a PPI, the centrality of a gene reflects the number of interactions in which the gene directly or  
929 indirectly participates. Four different centrality metrics were computed for all genes in the PPI  
930 using the networkx python library:

931

- 932 (1) **Betweenness** reflects the number of shortest paths passing through a gene.
- 933 (2) **Eigenvector** is a measure of the influence of a gene in the network.
- 934 (3) **Closeness** measures the sum of shortest distance of a gene to all the other genes.
- 935 (4) **Degree centrality** corresponds to the normalized number of edges of a gene in the network.

936

937 While there exist more centrality measures, these four are commonly used to assess biological  
938 networks. These computed centrality parameters of the genes measured in the screen were

939 computed with 03\_ROC\_curve\_analysis\_of\_network\_metrics.ipynb, and are reported in the  
940 Table S1 (see 09\_Making\_the\_database\_table.ipynb).

## 941 Receiver Operating Characteristic (ROC) curves

942 To check whether the centrality of a gene in the network could predict the phenotypic effect  
943 produced by RNAi against that gene, ROC curves were plotted for the four aforementioned  
944 centrality measures of each gene in each screen. A ROC analysis is used to measure the  
945 correlation between a continuous variable (centrality) and a binary outcome (above or below Z  
946 score threshold). Therefore, for each screen, measured genes were rank-ordered from high  
947 centrality to low centrality, and plotted against the binary outcome of  $|Z_{gene}|$  being above or  
948 below the appropriate  $|Z$  score threshold ( $>5$  for egg laying and  $>2$  for ovariole number). The  
949 Area Under the Curve (AUC) measures the extent of correlation between centrality and effect of  
950 a gene on measured phenotype. AUC above or below 0.5 indicates a positive or negative  
951 correlation respectively, while an AUC of 0.5 indicates no correlation of the parameters. The  
952 scikit learn python package was used to calculate the AUC of each ROC curve plotted (see  
953 03\_ROC\_curve\_analysis\_of\_network\_metrics.ipynb).

## 954 Building the network modules

955 Network modules were built using the previously published Seed-Connector algorithm (SCA)  
956 (Wang et al., 2017; Wang and Loscalzo, 2018), implemented here in python (see 04\_Seed-  
957 Connector.ipynb) and illustrated in Figure 5a. Creating a module using the SCA requires a list of  
958 seed genes and a PPI. From each of the three screens, we selected the genes whose  $|Z_{gene}|$   
959 value was above the threshold and created three seed lists respectively (Figure 4c: Egg laying,  
960 *hpo[RNAi]* egg laying and *hpo[RNAi]* ovariole 'seed' list). A fourth list consisting of the  
961 intersection of the aforementioned seed lists was also collated and called the core 'seed' list  
962 (Figure 4b). Genes were assigned in the core list if they passed the Z threshold in all 3 screens.  
963 The Seed-Connector algorithm was then executed on each of these seed lists using the PPI.  
964 Not all genes in the four seed lists were found in the PPI network (specifically, CG12147 in the  
965 *hpo[RNAi]* Egg Laying seed list and CG6104 in the *hpo[RNAi]* Ovariole number seed list were  
966 absent from the PPI) and were therefore eliminated from further network analysis. The removal  
967 of these two genes accounts for the variation in the number of positive candidates in Table 2  
968 and the number of seed genes in the module. Modules were obtained for each seed list (Figure  
969 5b; Figure S6) consisting of the seed genes (circles in Figure 5b and Figure S6) and previously  
970 untested genes added by the SCA (squares in Figure 5b and Figure S6) to increase the LCC  
971 size that we refer to as connector genes (see 04\_Seed-Connector.ipynb). The results of the  
972 algorithm are summarized in Table S1.

973  
974 The modularity of the subnetworks was then assessed using four network metrics namely  
975 Largest Connected Component (LCC), number of edges, network density and average shortest  
976 path in the LCC. Each metric for each module was assessed using distance of the network  
977 metric to a null distribution. Initially, the null distribution was calculated by taking 1000 samples  
978 of 463 genes randomly selected from the PPI and calculating the above metrics. We found that

979 the 463 genes selected in the signalling screen were already more connected than the null  
980 distribution of sets of 463 genes randomly selected from the PPI (Figure S7a). Therefore, to  
981 avoid a false positive detection of modularity, the four experimentally obtained subnetworks  
982 were compared to null distributions obtained by randomly sampling an equal number of genes  
983 from the 463 signalling candidate genes selected for our screen. For each of the four modules,  
984 comparison of the metrics was performed on the seed lists and the sub-network after the SCA.  
985 Most metrics were enriched in the seed group when compared to the null distribution with the  
986 exception of the Average shortest path (Figure S7b, light red line). The sub-networks obtained  
987 from the SCA further increased all four metrics suggesting the modularity of the four sub-  
988 networks (Figure S7b, dark red line; see 05\_Network\_Module\_testing.ipynb for code  
989 implementation).

## 990 Meta network

991 To build the meta network, the genes from all four modules were concatenated into one  
992 network. The network was then visually sorted in an approach akin to projecting the network on  
993 a Venn Diagram. The meta network was sorted by which of the three screens the gene was  
994 positive in. The intersections were genes whose  $|Z_{gene}|$  value was above the threshold in more  
995 than one and possibly all three of the screening paradigms. For example, if a gene was found in  
996 the *hpo[RNAi]* Ovariole Number and Egg Laying module it is then assigned to the dual positive  
997 group *hpo[RNAi]* Ovariole Number / Egg Laying (Figure 7a, module VI). After applying this  
998 grouping strategy, the connectivity across the groups was studied by calculating the edge  
999 density between all groups ( $density = \frac{Edge_{s_1,2}}{Nodes_1 * Nodes_2}$ ). Finally, the proportion of each signaling  
1000 candidate in each of those groups was calculated by taking the number of members of a  
1001 signaling pathway divided by the total members of a group (see lpython notebook  
1002 08\_MetaModule\_Analysis.ipynb).

## 1003 QUANTIFICATION AND STATISTICAL ANALYSIS

### 1004 Number of samples

1005 The number of samples across the different screens were as follows:

#### 1006 *hpo[RNAi]* Egg Laying and Egg Laying screens

- 1007 - Controls: five vials of three females and two males
- 1008 - Sample: one vial of three females and two males

#### 1009 *hpo[RNAi]* Ovariole number screen

- 1010 - Controls: 20 flies, two ovaries per fly considered as independent measurements
- 1011 - Sample: 10 flies, two ovaries per fly considered as independent measurements

## 1012 Correction of batch effect

1013 Despite best efforts to maintain the exact same condition between each experiment, some  
1014 variation was measured between the batches. Control flies showed variations in both measured  
1015 phenotypes, ovariole number and egg laying (Figure S1). In order to compare the values  
1016 measured across different batches, each sample was standardized by calculating its Z score  
1017 ( $Z_{gene}$ ) to the control distribution. For each batch, the measurements for controls were pooled into  
1018 a distribution, and the mean and standard deviation was computed. Then each sample was  
1019 compared to its respective batch and its Z score computed (see “*Gene selection based on Z*  
1020 *score and batch standardization*” for formula).

## 1021 Statistical analysis

1022 All statistical analyses were performed using the scipy stats module (<https://www.scipy.org/>) and  
1023 scikit learn (<https://scikit-learn.org/>). Significance thresholds for p-values were set at 0.05.  
1024 Statistical tests and p-values are reported in the figure legends. All statistical tests can be found  
1025 in the lpython notebooks mentioned below.

## 1026 DATA AND CODE AVAILABILITY

1027 This study generated a series of python3 lpython notebook files that perform the entire analysis  
1028 presented in this study. All the results presented in this paper, including the figures with the  
1029 exception of the network visualizations, which were created using Cytoscape3  
1030 (<https://cytoscape.org/>) can be reproduced by running the aforementioned python3 code. The  
1031 raw data, calculations made with these data, and code used for calculations and analyses  
1032 (lpython notebooks) are available as supplementary information. For ease of access, legibility  
1033 and reproducibility, the code and datasets have been deposited in a GitHub repository available  
1034 at [https://github.com/extavourlab/hpo\\_ova\\_eggL\\_screen](https://github.com/extavourlab/hpo_ova_eggL_screen).

1035

## 1036 KEY RESOURCES TABLES

### 1037 Software and libraries

1038 All software and libraries used in this study are published under open source licenses and are  
1039 therefore publicly available.

1040

| Type     | Name        | Version | Source                                                                                                                |
|----------|-------------|---------|-----------------------------------------------------------------------------------------------------------------------|
| Library  | matplotlib  | 3.0.0   | <a href="https://matplotlib.org/">https://matplotlib.org/</a>                                                         |
| Library  | networkx    | 2.3     | <a href="http://networkx.github.io/">http://networkx.github.io/</a>                                                   |
| Library  | numpy       | 1.11.3  | <a href="https://www.numpy.org/">https://www.numpy.org/</a>                                                           |
| Library  | pandas      | 0.20.3  | <a href="https://pandas.pydata.org/">https://pandas.pydata.org/</a> /                                                 |
| Library  | progressbar | 3.38.0  | <a href="https://github.com/niltonvolpato/python-progressbar">https://github.com/niltonvolpato/python-progressbar</a> |
| Library  | scipy       | 1.1.0   | <a href="https://www.scipy.org/">https://www.scipy.org/</a>                                                           |
| Library  | seaborn     | 0.9.0   | <a href="https://seaborn.pydata.org/">https://seaborn.pydata.org/</a>                                                 |
| Software | Cytoscape   | 3.4.0   | <a href="https://cytoscape.org/">https://cytoscape.org/</a>                                                           |
| Software | Inkscape    | 0.92.3  | <a href="https://inkscape.org/">https://inkscape.org/</a>                                                             |
| Software | Python3     | 3.7     | <a href="https://www.python.org/">https://www.python.org/</a>                                                         |

1041



1042 *Drosophila melanogaster* genetic lines

1043

| Experimental Models: Organisms/Strains                                                                                                                                                      |                                     |                                   |
|---------------------------------------------------------------------------------------------------------------------------------------------------------------------------------------------|-------------------------------------|-----------------------------------|
| Description                                                                                                                                                                                 | Stock Center                        | IDs                               |
| <i>D. melanogaster</i> . Expresses dsRNA for RNAi of CanA1 (FBgn0010015) under UAS control in the VALIUM10 vector.: y[1] v[1]; P{y[+t7.7] v[+t1.8]=TRiP.JF01871}attP2                       | Bloomington Drosophila Stock Center | BDSC:25850; FlyBase:FBst0025850 ; |
| <i>D. melanogaster</i> . Expresses dsRNA for RNAi of fng (FBgn0011591) under UAS control in the VALIUM10 vector.: y[1] v[1]; P{y[+t7.7] v[+t1.8]=TRiP.JF01967}attP2                         | Bloomington Drosophila Stock Center | BDSC:25947; FlyBase:FBst0025947 ; |
| <i>D. melanogaster</i> . Expresses dsRNA for RNAi of Aplip1 (FBgn0040281) under UAS control in the VALIUM10 vector.: y[1] v[1]; P{y[+t7.7] v[+t1.8]=TRiP.JF02049}attP2                      | Bloomington Drosophila Stock Center | BDSC:26024; FlyBase:FBst0026024 ; |
| <i>D. melanogaster</i> . Expresses dsRNA for RNAi of E(spl)mdelta-HLH (FBgn0002734) under UAS control in the VALIUM10 vector.: y[1] v[1]; P{y[+t7.7] v[+t1.8]=TRiP.JF02101}attP2/TM3, Sb[1] | Bloomington Drosophila Stock Center | BDSC:26203; FlyBase:FBst0026203 ; |
| <i>D. melanogaster</i> . Expresses dsRNA for RNAi of sima (FBgn0266411) under UAS control in the VALIUM10 vector.: y[1] v[1]; P{y[+t7.7] v[+t1.8]=TRiP.JF02105}attP2                        | Bloomington Drosophila Stock Center | BDSC:26207; FlyBase:FBst0026207 ; |
| <i>D. melanogaster</i> . Expresses dsRNA for RNAi of E(spl)m8-HLH (FBgn0000591) under UAS control in the VALIUM10 vector.: y[1] v[1]; P{y[+t7.7] v[+t1.8]=TRiP.JF02096}attP2                | Bloomington Drosophila Stock Center | BDSC:26322; FlyBase:FBst0026322 ; |
| <i>D. melanogaster</i> . Expresses dsRNA for RNAi of pan (FBgn0085432) under UAS control in the VALIUM10 vector.: y[1] v[1]; P{y[+t7.7] v[+t1.8]=TRiP.JF02306}attP2                         | Bloomington Drosophila Stock Center | BDSC:26743; FlyBase:FBst0026743 ; |
| <i>D. melanogaster</i> . Expresses dsRNA for RNAi of CanB (FBgn0010014) under UAS control in the VALIUM10 vector.: y[1] v[1]; P{y[+t7.7] v[+t1.8]=TRiP.JF02616}attP2                        | Bloomington Drosophila Stock Center | BDSC:27307; FlyBase:FBst0027307 ; |
| <i>D. melanogaster</i> . Expresses dsRNA for RNAi of mib1 (FBgn0263601) under UAS control in the VALIUM10 vector.: y[1] v[1]; P{y[+t7.7] v[+t1.8]=TRiP.JF02629}attP2                        | Bloomington Drosophila Stock Center | BDSC:27320; FlyBase:FBst0027320 ; |
| <i>D. melanogaster</i> . Expresses dsRNA for RNAi of Nct (FBgn0039234) under UAS control in the VALIUM10                                                                                    | Bloomington Drosophila Stock Center | BDSC:27498; FlyBase:FBst0027498 ; |



|                                                                                                                                                                                    |                                     |                                   |
|------------------------------------------------------------------------------------------------------------------------------------------------------------------------------------|-------------------------------------|-----------------------------------|
| vector.: y[1] v[1]; P{y[+t7.7] v[+t1.8]=TRiP.JF02648}attP2                                                                                                                         |                                     |                                   |
| <i>D. melanogaster</i> . Expresses dsRNA for RNAi of Cbl (FBgn0020224) under UAS control in the VALIUM10 vector.: y[1] v[1]; P{y[+t7.7] v[+t1.8]=TRiP.JF02650}attP2                | Bloomington Drosophila Stock Center | BDSC:27500; FlyBase:FBst0027500 ; |
| <i>D. melanogaster</i> . Expresses dsRNA for RNAi of Atg12 (FBgn0036255) under UAS control in the VALIUM10 vector.: y[1] v[1]; P{y[+t7.7] v[+t1.8]=TRiP.JF02704}attP2              | Bloomington Drosophila Stock Center | BDSC:27552; FlyBase:FBst0027552 ; |
| <i>D. melanogaster</i> . Expresses dsRNA for RNAi of fz2 (FBgn0016797) under UAS control in the VALIUM10 vector.: y[1] v[1]; P{y[+t7.7] v[+t1.8]=TRiP.JF02722}attP2                | Bloomington Drosophila Stock Center | BDSC:27568; FlyBase:FBst0027568 ; |
| <i>D. melanogaster</i> . Expresses dsRNA for RNAi of Psn (FBgn0284421) under UAS control in the VALIUM10 vector.: y[1] v[1]; P{y[+t7.7] v[+t1.8]=TRiP.JF02760}attP2/TM3, Sb[1]     | Bloomington Drosophila Stock Center | BDSC:27681; FlyBase:FBst0027681 ; |
| <i>D. melanogaster</i> . Expresses dsRNA for RNAi of Pi3K92E (FBgn0015279) under UAS control in the VALIUM10 vector.: y[1] v[1]; P{y[+t7.7] v[+t1.8]=TRiP.JF02770}attP2/TM3, Sb[1] | Bloomington Drosophila Stock Center | BDSC:27690; FlyBase:FBst0027690 ; |
| <i>D. melanogaster</i> . Expresses dsRNA for RNAi of Cdk4 (FBgn0016131) under UAS control in the VALIUM10 vector.: y[1] v[1]; P{y[+t7.7] v[+t1.8]=TRiP.JF02795}attP2               | Bloomington Drosophila Stock Center | BDSC:27714; FlyBase:FBst0027714 ; |
| <i>D. melanogaster</i> . Expresses dsRNA for RNAi of mts (FBgn0004177) under UAS control in the VALIUM10 vector.: y[1] v[1]; P{y[+t7.7] v[+t1.8]=TRiP.JF02805}attP2                | Bloomington Drosophila Stock Center | BDSC:27723; FlyBase:FBst0027723 ; |
| <i>D. melanogaster</i> . Expresses dsRNA for RNAi of Pdk1 (FBgn0020386) under UAS control in the VALIUM10 vector.: y[1] v[1]; P{y[+t7.7] v[+t1.8]=TRiP.JF02807}attP2               | Bloomington Drosophila Stock Center | BDSC:27725; FlyBase:FBst0027725 ; |
| <i>D. melanogaster</i> . Expresses dsRNA for RNAi of ds (FBgn0284247) under UAS control in the VALIUM10 vector.: y[1] v[1]; P{y[+t7.7] v[+t1.8]=TRiP.JF02842}attP2                 | Bloomington Drosophila Stock Center | BDSC:28008; FlyBase:FBst0028008 ; |
| <i>D. melanogaster</i> . Expresses dsRNA for RNAi of Hrs (FBgn0031450) under UAS control in the VALIUM10 vector.: y[1] v[1]; P{y[+t7.7] v[+t1.8]=TRiP.JF02860}attP2                | Bloomington Drosophila Stock Center | BDSC:28026; FlyBase:FBst0028026 ; |

|                                                                                                                                                                                  |                                           |                                         |
|----------------------------------------------------------------------------------------------------------------------------------------------------------------------------------|-------------------------------------------|-----------------------------------------|
| <i>D. melanogaster</i> . Expresses dsRNA for RNAi of mam (FBgn0002643) under UAS control in the VALIUM10 vector.: y[1] v[1]; P{y[+t7.7] v[+t1.8]=TRiP.JF02881}attP2              | Bloomington<br>Drosophila Stock<br>Center | BDSC:28046;<br>FlyBase:FBst0028046<br>; |
| <i>D. melanogaster</i> . Expresses dsRNA for RNAi of bun (FBgn0259176) under UAS control in the VALIUM10 vector.: y[1] v[1]; P{y[+t7.7] v[+t1.8]=TRiP.JF02954}attP2              | Bloomington<br>Drosophila Stock<br>Center | BDSC:28322;<br>FlyBase:FBst0028322<br>; |
| <i>D. melanogaster</i> . Expresses dsRNA for RNAi of aos (FBgn0004569) under UAS control in the VALIUM10 vector.: y[1] v[1]; P{y[+t7.7] v[+t1.8]=TRiP.JF03020}attP2              | Bloomington<br>Drosophila Stock<br>Center | BDSC:28383;<br>FlyBase:FBst0028383<br>; |
| <i>D. melanogaster</i> . Expresses dsRNA for RNAi of pcx (FBgn0003048) under UAS control in the VALIUM10 vector.: y[1] v[1]; P{y[+t7.7] v[+t1.8]=TRiP.HM05038}attP2/TM3, Sb[1]   | Bloomington<br>Drosophila Stock<br>Center | BDSC:28552;<br>FlyBase:FBst0028552<br>; |
| <i>D. melanogaster</i> . Expresses dsRNA for RNAi of Su(fu) (FBgn0005355) under UAS control in the VALIUM10 vector.: y[1] v[1]; P{y[+t7.7] v[+t1.8]=TRiP.HM05045}attP2           | Bloomington<br>Drosophila Stock<br>Center | BDSC:28559;<br>FlyBase:FBst0028559<br>; |
| <i>D. melanogaster</i> . Expresses dsRNA for RNAi of Apc2 (FBgn0026598) under UAS control in the VALIUM10 vector.: y[1] v[1]; P{y[+t7.7] v[+t1.8]=TRiP.HM05073}attP2             | Bloomington<br>Drosophila Stock<br>Center | BDSC:28585;<br>FlyBase:FBst0028585<br>; |
| <i>D. melanogaster</i> . Expresses dsRNA for RNAi of l(2)tid (FBgn0002174) under UAS control in the VALIUM10 vector.: y[1] v[1]; P{y[+t7.7] v[+t1.8]=TRiP.HM05082}attP2          | Bloomington<br>Drosophila Stock<br>Center | BDSC:28594;<br>FlyBase:FBst0028594<br>; |
| <i>D. melanogaster</i> . Expresses dsRNA for RNAi of Su(H) (FBgn0004837) under UAS control in the VALIUM10 vector.: y[1] v[1]; P{y[+t7.7] v[+t1.8]=TRiP.HM05110}attP2/TM3, Sb[1] | Bloomington<br>Drosophila Stock<br>Center | BDSC:28900;<br>FlyBase:FBst0028900<br>; |
| <i>D. melanogaster</i> . Expresses dsRNA for RNAi of PDZ-GEF (FBgn0265778) under UAS control in the VALIUM10 vector.: y[1] v[1]; P{y[+t7.7] v[+t1.8]=TRiP.HM05139}attP2          | Bloomington<br>Drosophila Stock<br>Center | BDSC:28928;<br>FlyBase:FBst0028928<br>; |
| <i>D. melanogaster</i> . Expresses dsRNA for RNAi of wntD (FBgn0038134) under UAS control in the VALIUM10 vector.: y[1] v[1]; P{y[+t7.7] v[+t1.8]=TRiP.HM05158}attP2             | Bloomington<br>Drosophila Stock<br>Center | BDSC:28947;<br>FlyBase:FBst0028947<br>; |
| <i>D. melanogaster</i> . Expresses dsRNA for RNAi of Cdk2 (FBgn0004107) under UAS control in the VALIUM10 vector.: y[1] v[1]; P{y[+t7.7] v[+t1.8]=TRiP.HM05163}attP2             | Bloomington<br>Drosophila Stock<br>Center | BDSC:28952;<br>FlyBase:FBst0028952<br>; |

|                                                                                                                                                                                                         |                                           |                                         |
|---------------------------------------------------------------------------------------------------------------------------------------------------------------------------------------------------------|-------------------------------------------|-----------------------------------------|
| <i>D. melanogaster</i> . Expresses dsRNA for RNAi of <i>ci</i> (FBgn0004859) under UAS control in the VALIUM10 vector.: y[1] v[1]; P{y[+7.7] v[+1.8]=TRiP.JF01715}attP2                                 | Bloomington<br>Drosophila Stock<br>Center | BDSC:28984;<br>FlyBase:FBst0028984<br>; |
| <i>D. melanogaster</i> . Expresses dsRNA for RNAi of <i>mgl</i> (FBgn0261260) under UAS control in the VALIUM10 vector.: y[1] v[1]; P{y[+7.7] v[+1.8]=TRiP.JF02485}attP2                                | Bloomington<br>Drosophila Stock<br>Center | BDSC:29324;<br>FlyBase:FBst0029324<br>; |
| <i>D. melanogaster</i> . Expresses dsRNA for RNAi of <i>E(spl)m4-BFM</i> (FBgn0002629) under UAS control in the VALIUM10 vector.: y[1] v[1]; P{y[+7.7] v[+1.8]=TRiP.JF03310}attP2                       | Bloomington<br>Drosophila Stock<br>Center | BDSC:29378;<br>FlyBase:FBst0029378<br>; |
| <i>D. melanogaster</i> . Expresses dsRNA for RNAi of <i>Wnt4</i> (FBgn0010453) under UAS control in the VALIUM10 vector.: y[1] v[1]; P{y[+7.7] v[+1.8]=TRiP.JF03378}attP2                               | Bloomington<br>Drosophila Stock<br>Center | BDSC:29442;<br>FlyBase:FBst0029442<br>; |
| <i>D. melanogaster</i> . Expresses dsRNA for RNAi of <i>Dif</i> (FBgn0011274) under UAS control in the VALIUM10 vector.: y[1] sc[*] v[1] sev[21]; P{y[+7.7] v[+1.8]=TRiP.HM05257}attP2                  | Bloomington<br>Drosophila Stock<br>Center | BDSC:30513;<br>FlyBase:FBst0030513<br>; |
| <i>D. melanogaster</i> . Expresses dsRNA for RNAi of <i>InR</i> (FBgn0283499) under UAS control in the VALIUM1 vector.: y[1] v[1]; P{y[+7.7] v[+1.8]=TRiP.JF01482}attP2                                 | Bloomington<br>Drosophila Stock<br>Center | BDSC:31037;<br>FlyBase:FBst0031037<br>; |
| <i>D. melanogaster</i> . Expresses dsRNA for RNAi of <i>Cdc5</i> (FBgn0265574) and <i>Roc1b</i> (FBgn0040291) under UAS control in the VALIUM1 vector.: y[1] v[1]; P{y[+7.7] v[+1.8]=TRiP.JF01517}attP2 | Bloomington<br>Drosophila Stock<br>Center | BDSC:31067;<br>FlyBase:FBst0031067<br>; |
| <i>D. melanogaster</i> . Expresses dsRNA for RNAi of <i>Egfr</i> (FBgn0003731) under UAS control in the VALIUM1 vector.: y[1] v[1]; P{y[+7.7] v[+1.8]=TRiP.JF01696}attP2                                | Bloomington<br>Drosophila Stock<br>Center | BDSC:31183;<br>FlyBase:FBst0031183<br>; |
| <i>D. melanogaster</i> . Expresses dsRNA for RNAi of <i>norpA</i> (FBgn0262738) under UAS control in the VALIUM1 vector.: y[1] v[1]; P{y[+7.7] v[+1.8]=TRiP.JF01713}attP2                               | Bloomington<br>Drosophila Stock<br>Center | BDSC:31197;<br>FlyBase:FBst0031197<br>; |
| <i>D. melanogaster</i> . Expresses dsRNA for RNAi of <i>CenG1A</i> (FBgn0028509) under UAS control in the VALIUM1 vector.: y[1] v[1]; P{y[+7.7] v[+1.8]=TRiP.JF01807}attP2                              | Bloomington<br>Drosophila Stock<br>Center | BDSC:31228;<br>FlyBase:FBst0031228<br>; |
| <i>D. melanogaster</i> . Expresses dsRNA for RNAi of <i>dsh</i> (FBgn0000499) under UAS control in the VALIUM1 vector.: y[1] v[1]; P{y[+7.7] v[+1.8]=TRiP.JF01254}attP2                                 | Bloomington<br>Drosophila Stock<br>Center | BDSC:31307;<br>FlyBase:FBst0031307<br>; |

|                                                                                                                                                                                                |                                           |                                         |
|------------------------------------------------------------------------------------------------------------------------------------------------------------------------------------------------|-------------------------------------------|-----------------------------------------|
| <i>D. melanogaster</i> . Expresses dsRNA for RNAi of TI (FBgn0262473) under UAS control in the VALIUM1 vector.: y[1] v[1]; P{y[+t7.7] v[+t1.8]=TRiP.JF01276}attP2                              | Bloomington<br>Drosophila Stock<br>Center | BDSC:31477;<br>FlyBase:FBst0031477<br>; |
| <i>D. melanogaster</i> . Expresses dsRNA for RNAi of I(2)gl (FBgn0002121) under UAS control in the VALIUM1 vector.: y[1] v[1]; P{y[+t7.7] v[+t1.8]=TRiP.JF01073}attP2                          | Bloomington<br>Drosophila Stock<br>Center | BDSC:31517;<br>FlyBase:FBst0031517<br>; |
| <i>D. melanogaster</i> . Expresses dsRNA for RNAi of Jra (FBgn0001291) under UAS control in the VALIUM1 vector.: y[1] v[1]; P{y[+t7.7] v[+t1.8]=TRiP.JF01184}attP2                             | Bloomington<br>Drosophila Stock<br>Center | BDSC:31595;<br>FlyBase:FBst0031595<br>; |
| <i>D. melanogaster</i> . Expresses dsRNA for RNAi of Axn (FBgn0026597) under UAS control in the VALIUM1 vector.: y[1] v[1]; P{y[+t7.7] v[+t1.8]=TRiP.HM04012}attP2                             | Bloomington<br>Drosophila Stock<br>Center | BDSC:31705;<br>FlyBase:FBst0031705<br>; |
| <i>D. melanogaster</i> . Expresses dsRNA for RNAi of gig (FBgn0005198) under UAS control in the VALIUM1 vector.: y[1] v[1]; P{y[+t7.7] v[+t1.8]=TRiP.HM04083}attP2                             | Bloomington<br>Drosophila Stock<br>Center | BDSC:31770;<br>FlyBase:FBst0031770<br>; |
| <i>D. melanogaster</i> . Expresses dsRNA for RNAi of Med (FBgn0011655) under UAS control in the VALIUM10 vector.: y[1] v[1]; P{y[+t7.7] v[+t1.8]=TRiP.JF02218}attP2                            | Bloomington<br>Drosophila Stock<br>Center | BDSC:31928;<br>FlyBase:FBst0031928<br>; |
| <i>D. melanogaster</i> . Expresses dsRNA for RNAi of RagC-D (FBgn0033272) under UAS control in the VALIUM20 vector.: y[1] sc[*] v[1] sev[21]; P{y[+t7.7] v[+t1.8]=TRiP.HMS00333}attP2          | Bloomington<br>Drosophila Stock<br>Center | BDSC:32342;<br>FlyBase:FBst0032342<br>; |
| <i>D. melanogaster</i> . Expresses dsRNA for RNAi of AMPKalpha (FBgn0023169) under UAS control in the VALIUM20 vector.: y[1] sc[*] v[1] sev[21]; P{y[+t7.7] v[+t1.8]=TRiP.HMS00362}attP2       | Bloomington<br>Drosophila Stock<br>Center | BDSC:32371;<br>FlyBase:FBst0032371<br>; |
| <i>D. melanogaster</i> . Expresses dsRNA for RNAi of Rho1 (FBgn0014020) under UAS control in the VALIUM20 vector.: y[1] sc[*] v[1] sev[21]; P{y[+t7.7] v[+t1.8]=TRiP.HMS00375}attP2/TM3, Sb[1] | Bloomington<br>Drosophila Stock<br>Center | BDSC:32383;<br>FlyBase:FBst0032383<br>; |
| <i>D. melanogaster</i> . Expresses dsRNA for RNAi of pk (FBgn0003090) under UAS control in the VALIUM20 vector.: y[1] sc[*] v[1] sev[21]; P{y[+t7.7] v[+t1.8]=TRiP.HMS00408}attP2              | Bloomington<br>Drosophila Stock<br>Center | BDSC:32413;<br>FlyBase:FBst0032413<br>; |
| <i>D. melanogaster</i> . Expresses dsRNA for RNAi of RpS6 (FBgn0261592) under UAS control in the VALIUM20 vector.: y[1] sc[*] v[1] sev[21]; P{y[+t7.7] v[+t1.8]=TRiP.HMS00413}attP2            | Bloomington<br>Drosophila Stock<br>Center | BDSC:32418;<br>FlyBase:FBst0032418<br>; |

|                                                                                                                                                                                                  |                                           |                                         |
|--------------------------------------------------------------------------------------------------------------------------------------------------------------------------------------------------|-------------------------------------------|-----------------------------------------|
| <i>D. melanogaster</i> . Expresses dsRNA for RNAi of foxo (FBgn0038197) under UAS control in the VALIUM20 vector.: y[1] sc[*] v[1] sev[21]; P{y[+t7.7] v[+t1.8]=TRiP.HMS00422}attP2              | Bloomington<br>Drosophila Stock<br>Center | BDSC:32427;<br>FlyBase:FBst0032427<br>; |
| <i>D. melanogaster</i> . Expresses dsRNA for RNAi of Plc21C (FBgn0004611) under UAS control in the VALIUM20 vector.: y[1] sc[*] v[1] sev[21]; P{y[+t7.7] v[+t1.8]=TRiP.HMS00436}attP2/TM3, Sb[1] | Bloomington<br>Drosophila Stock<br>Center | BDSC:32438;<br>FlyBase:FBst0032438<br>; |
| <i>D. melanogaster</i> . Expresses dsRNA for RNAi of Ilp2 (FBgn0036046) under UAS control in the VALIUM20 vector.: y[1] sc[*] v[1] sev[21]; P{y[+t7.7] v[+t1.8]=TRiP.HMS00476}attP2/TM3, Sb[1]   | Bloomington<br>Drosophila Stock<br>Center | BDSC:32475;<br>FlyBase:FBst0032475<br>; |
| <i>D. melanogaster</i> . Expresses dsRNA for RNAi of hh (FBgn0004644) under UAS control in the VALIUM20 vector.: y[1] sc[*] v[1] sev[21]; P{y[+t7.7] v[+t1.8]=TRiP.HMS00492}attP2/TM3, Sb[1]     | Bloomington<br>Drosophila Stock<br>Center | BDSC:32489;<br>FlyBase:FBst0032489<br>; |
| <i>D. melanogaster</i> . Expresses dsRNA for RNAi of Spred (FBgn0020767) under UAS control in the VALIUM20 vector.: y[1] sc[*] v[1] sev[21]; P{y[+t7.7] v[+t1.8]=TRiP.HMS00637}attP2             | Bloomington<br>Drosophila Stock<br>Center | BDSC:32852;<br>FlyBase:FBst0032852<br>; |
| <i>D. melanogaster</i> . Expresses dsRNA for RNAi of upd3 (FBgn0053542) under UAS control in the VALIUM20 vector.: y[1] sc[*] v[1] sev[21]; P{y[+t7.7] v[+t1.8]=TRiP.HMS00646}attP2              | Bloomington<br>Drosophila Stock<br>Center | BDSC:32859;<br>FlyBase:FBst0032859<br>; |
| <i>D. melanogaster</i> . Expresses dsRNA for RNAi of Ilp1 (FBgn0044051) under UAS control in the VALIUM20 vector.: y[1] sc[*] v[1] sev[21]; P{y[+t7.7] v[+t1.8]=TRiP.HMS00648}attP2              | Bloomington<br>Drosophila Stock<br>Center | BDSC:32861;<br>FlyBase:FBst0032861<br>; |
| <i>D. melanogaster</i> . Expresses dsRNA for RNAi of Ilp7 (FBgn0044046) under UAS control in the VALIUM20 vector.: y[1] sc[*] v[1] sev[21]; P{y[+t7.7] v[+t1.8]=TRiP.HMS00649}attP2              | Bloomington<br>Drosophila Stock<br>Center | BDSC:32862;<br>FlyBase:FBst0032862<br>; |
| <i>D. melanogaster</i> . Expresses dsRNA for RNAi of SkpA (FBgn0025637) under UAS control in the VALIUM20 vector.: y[1] sc[*] v[1] sev[21]; P{y[+t7.7] v[+t1.8]=TRiP.HMS00657}attP2              | Bloomington<br>Drosophila Stock<br>Center | BDSC:32870;<br>FlyBase:FBst0032870<br>; |
| <i>D. melanogaster</i> . Expresses dsRNA for RNAi of CG3226 (FBgn0029882) under UAS control in the VALIUM20 vector.: y[1] sc[*] v[1] sev[21]; P{y[+t7.7] v[+t1.8]=TRiP.HMS00662}attP2            | Bloomington<br>Drosophila Stock<br>Center | BDSC:32875;<br>FlyBase:FBst0032875<br>; |
| <i>D. melanogaster</i> . Expresses dsRNA for RNAi of CtBP (FBgn0020496) under UAS control in the VALIUM20 vector.: y[1] sc[*] v[1] sev[21]; P{y[+t7.7] v[+t1.8]=TRiP.HMS00677}attP2              | Bloomington<br>Drosophila Stock<br>Center | BDSC:32889;<br>FlyBase:FBst0032889<br>; |



|                                                                                                                                                                                                  |                                           |                                         |
|--------------------------------------------------------------------------------------------------------------------------------------------------------------------------------------------------|-------------------------------------------|-----------------------------------------|
| <i>D. melanogaster</i> . Expresses dsRNA for RNAi of Hel89B (FBgn0022787) under UAS control in the VALIUM20 vector.: y[1] sc[*] v[1] sev[21]; P{y[+t7.7] v[+t1.8]=TRiP.HMS00684}attP2            | Bloomington<br>Drosophila Stock<br>Center | BDSC:32895;<br>FlyBase:FBst0032895<br>; |
| <i>D. melanogaster</i> . Expresses dsRNA for RNAi of Tctp (FBgn0037874) under UAS control in the VALIUM20 vector.: y[1] sc[*] v[1] sev[21]; P{y[+t7.7] v[+t1.8]=TRiP.HMS00701}attP2/TM3, Sb[1]   | Bloomington<br>Drosophila Stock<br>Center | BDSC:32911;<br>FlyBase:FBst0032911<br>; |
| <i>D. melanogaster</i> . Expresses dsRNA for RNAi of jub (FBgn0030530) under UAS control in the VALIUM20 vector.: y[1] sc[*] v[1] sev[21]; P{y[+t7.7] v[+t1.8]=TRiP.HMS00714}attP2               | Bloomington<br>Drosophila Stock<br>Center | BDSC:32923;<br>FlyBase:FBst0032923<br>; |
| <i>D. melanogaster</i> . Expresses dsRNA for RNAi of Gug (FBgn0010825) under UAS control in the VALIUM20 vector.: y[1] sc[*] v[1] sev[21]; P{y[+t7.7] v[+t1.8]=TRiP.HMS00756}attP2               | Bloomington<br>Drosophila Stock<br>Center | BDSC:32961;<br>FlyBase:FBst0032961<br>; |
| <i>D. melanogaster</i> . Expresses dsRNA for RNAi of sav (FBgn0053193) under UAS control in the VALIUM20 vector.: y[1] sc[*] v[1] sev[21]; P{y[+t7.7] v[+t1.8]=TRiP.HMS00760}attP2               | Bloomington<br>Drosophila Stock<br>Center | BDSC:32965;<br>FlyBase:FBst0032965<br>; |
| <i>D. melanogaster</i> . Expresses dsRNA for RNAi of bsk (FBgn0000229) under UAS control in the VALIUM20 vector.: y[1] sc[*] v[1] sev[21]; P{y[+t7.7] v[+t1.8]=TRiP.HMS00777}attP2               | Bloomington<br>Drosophila Stock<br>Center | BDSC:32977;<br>FlyBase:FBst0032977<br>; |
| <i>D. melanogaster</i> . Expresses dsRNA for RNAi of Pgcl (FBgn0011822) under UAS control in the VALIUM20 vector.: y[1] sc[*] v[1] sev[21]; P{y[+t7.7] v[+t1.8]=TRiP.HMS00792}attP2/TM3, Sb[1]   | Bloomington<br>Drosophila Stock<br>Center | BDSC:32992;<br>FlyBase:FBst0032992<br>; |
| <i>D. melanogaster</i> . Expresses dsRNA for RNAi of polo (FBgn0003124) under UAS control in the VALIUM20 vector.: y[1] sc[*] v[1] sev[21]; P{y[+t7.7] v[+t1.8]=TRiP.HMS00530}attP2              | Bloomington<br>Drosophila Stock<br>Center | BDSC:33042;<br>FlyBase:FBst0033042<br>; |
| <i>D. melanogaster</i> . Expresses dsRNA for RNAi of cnk (FBgn0286070) under UAS control in the VALIUM20 vector.: y[1] sc[*] v[1] sev[21]; P{y[+t7.7] v[+t1.8]=TRiP.HMS00238}attP2               | Bloomington<br>Drosophila Stock<br>Center | BDSC:33366;<br>FlyBase:FBst0033366<br>; |
| <i>D. melanogaster</i> . Expresses dsRNA for RNAi of kay (FBgn0001297) under UAS control in the VALIUM20 vector.: y[1] sc[*] v[1] sev[21]; P{y[+t7.7] v[+t1.8]=TRiP.HMS00254}attP2               | Bloomington<br>Drosophila Stock<br>Center | BDSC:33379;<br>FlyBase:FBst0033379<br>; |
| <i>D. melanogaster</i> . Expresses dsRNA for RNAi of apolpp (FBgn0087002) under UAS control in the VALIUM20 vector.: y[1] sc[*] v[1] sev[21]; P{y[+t7.7] v[+t1.8]=TRiP.HMS00265}attP2/TM3, Sb[1] | Bloomington<br>Drosophila Stock<br>Center | BDSC:33388;<br>FlyBase:FBst0033388<br>; |

|                                                                                                                                                                                           |                                           |                                         |
|-------------------------------------------------------------------------------------------------------------------------------------------------------------------------------------------|-------------------------------------------|-----------------------------------------|
| <i>D. melanogaster</i> . Expresses dsRNA for RNAi of Su(var)205 (FBgn0003607) under UAS control in the VALIUM20 vector.: y[1] sc[*] v[1] sev[21]; P{y[+t7.7] v[+t1.8]=TRiP.HMS00278}attP2 | Bloomington<br>Drosophila Stock<br>Center | BDSC:33400;<br>FlyBase:FBst0033400<br>; |
| <i>D. melanogaster</i> . Expresses dsRNA for RNAi of Tak1 (FBgn0026323) under UAS control in the VALIUM20 vector.: y[1] sc[*] v[1] sev[21]; P{y[+t7.7] v[+t1.8]=TRiP.HMS00282}attP2       | Bloomington<br>Drosophila Stock<br>Center | BDSC:33404;<br>FlyBase:FBst0033404<br>; |
| <i>D. melanogaster</i> . Expresses dsRNA for RNAi of hpo (FBgn0261456) under UAS control in the VALIUM20 vector.: y[1] v[1]; P{y[+t7.7] v[+t1.8]=TRiP.HMS00006}attP2                      | Bloomington<br>Drosophila Stock<br>Center | BDSC:33614;<br>FlyBase:FBst0033614<br>; |
| <i>D. melanogaster</i> . Expresses dsRNA for RNAi of Akt1 (FBgn0010379) under UAS control in the VALIUM20 vector.: y[1] v[1]; P{y[+t7.7] v[+t1.8]=TRiP.HMS00007}attP2                     | Bloomington<br>Drosophila Stock<br>Center | BDSC:33615;<br>FlyBase:FBst0033615<br>; |
| <i>D. melanogaster</i> . Expresses dsRNA for RNAi of N (FBgn0004647) under UAS control in the VALIUM20 vector.: y[1] v[1]; P{y[+t7.7] v[+t1.8]=TRiP.HMS00009}attP2                        | Bloomington<br>Drosophila Stock<br>Center | BDSC:33616;<br>FlyBase:FBst0033616<br>; |
| <i>D. melanogaster</i> . Expresses dsRNA for RNAi of csw (FBgn0000382) under UAS control in the VALIUM20 vector.: y[1] v[1]; P{y[+t7.7] v[+t1.8]=TRiP.HMS00012}attP2                      | Bloomington<br>Drosophila Stock<br>Center | BDSC:33619;<br>FlyBase:FBst0033619<br>; |
| <i>D. melanogaster</i> . Expresses dsRNA for RNAi of tor (FBgn0003733) under UAS control in the VALIUM20 vector.: y[1] v[1]; P{y[+t7.7] v[+t1.8]=TRiP.HMS00021}attP2                      | Bloomington<br>Drosophila Stock<br>Center | BDSC:33627;<br>FlyBase:FBst0033627<br>; |
| <i>D. melanogaster</i> . Expresses dsRNA for RNAi of Stat92E (FBgn0016917) under UAS control in the VALIUM20 vector.: y[1] v[1]; P{y[+t7.7] v[+t1.8]=TRiP.HMS00035}attP2                  | Bloomington<br>Drosophila Stock<br>Center | BDSC:33637;<br>FlyBase:FBst0033637<br>; |
| <i>D. melanogaster</i> . Expresses dsRNA for RNAi of Dsor1 (FBgn0010269) under UAS control in the VALIUM20 vector.: y[1] v[1]; P{y[+t7.7] v[+t1.8]=TRiP.HMS00037}attP2                    | Bloomington<br>Drosophila Stock<br>Center | BDSC:33639;<br>FlyBase:FBst0033639<br>; |
| <i>D. melanogaster</i> . Expresses dsRNA for RNAi of Pten (FBgn0026379) under UAS control in the VALIUM20 vector.: y[1] v[1]; P{y[+t7.7] v[+t1.8]=TRiP.HMS00044}attP2                     | Bloomington<br>Drosophila Stock<br>Center | BDSC:33643;<br>FlyBase:FBst0033643<br>; |
| <i>D. melanogaster</i> . Expresses dsRNA for RNAi of CycD (FBgn0010315) under UAS control in the VALIUM20 vector.: y[1] sc[*] v[1] sev[21]; P{y[+t7.7] v[+t1.8]=TRiP.HMS00059}attP2       | Bloomington<br>Drosophila Stock<br>Center | BDSC:33653;<br>FlyBase:FBst0033653<br>; |



|                                                                                                                                                                                     |                                           |                                         |
|-------------------------------------------------------------------------------------------------------------------------------------------------------------------------------------|-------------------------------------------|-----------------------------------------|
| <i>D. melanogaster</i> . Expresses dsRNA for RNAi of Rel (FBgn0014018) under UAS control in the VALIUM20 vector.: y[1] sc[*] v[1] sev[21]; P{y[+t7.7] v[+t1.8]=TRiP.HMS00070}attP2  | Bloomington<br>Drosophila Stock<br>Center | BDSC:33661;<br>FlyBase:FBst0033661<br>; |
| <i>D. melanogaster</i> . Expresses dsRNA for RNAi of upd1 (FBgn0004956) under UAS control in the VALIUM20 vector.: y[1] sc[*] v[1] sev[21]; P{y[+t7.7] v[+t1.8]=TRiP.HMS00545}attP2 | Bloomington<br>Drosophila Stock<br>Center | BDSC:33680;<br>FlyBase:FBst0033680<br>; |
| <i>D. melanogaster</i> . Expresses dsRNA for RNAi of Ilp3 (FBgn0044050) under UAS control in the VALIUM20 vector.: y[1] sc[*] v[1] sev[21]; P{y[+t7.7] v[+t1.8]=TRiP.HMS00546}attP2 | Bloomington<br>Drosophila Stock<br>Center | BDSC:33681;<br>FlyBase:FBst0033681<br>; |
| <i>D. melanogaster</i> . Expresses dsRNA for RNAi of Ilp4 (FBgn0044049) under UAS control in the VALIUM20 vector.: y[1] sc[*] v[1] sev[21]; P{y[+t7.7] v[+t1.8]=TRiP.HMS00547}attP2 | Bloomington<br>Drosophila Stock<br>Center | BDSC:33682;<br>FlyBase:FBst0033682<br>; |
| <i>D. melanogaster</i> . Expresses dsRNA for RNAi of Ilp5 (FBgn0044048) under UAS control in the VALIUM20 vector.: y[1] sc[*] v[1] sev[21]; P{y[+t7.7] v[+t1.8]=TRiP.HMS00548}attP2 | Bloomington<br>Drosophila Stock<br>Center | BDSC:33683;<br>FlyBase:FBst0033683<br>; |
| <i>D. melanogaster</i> . Expresses dsRNA for RNAi of Ilp6 (FBgn0044047) under UAS control in the VALIUM20 vector.: y[1] sc[*] v[1] sev[21]; P{y[+t7.7] v[+t1.8]=TRiP.HMS00549}attP2 | Bloomington<br>Drosophila Stock<br>Center | BDSC:33684;<br>FlyBase:FBst0033684<br>; |
| <i>D. melanogaster</i> . Expresses dsRNA for RNAi of d (FBgn0262029) under UAS control in the VALIUM20 vector.: y[1] sc[*] v[1] sev[21]; P{y[+t7.7] v[+t1.8]=TRiP.HMS01096}attP2    | Bloomington<br>Drosophila Stock<br>Center | BDSC:33754;<br>FlyBase:FBst0033754<br>; |
| <i>D. melanogaster</i> . Expresses dsRNA for RNAi of Dad (FBgn0020493) under UAS control in the VALIUM20 vector.: y[1] sc[*] v[1] sev[21]; P{y[+t7.7] v[+t1.8]=TRiP.HMS01102}attP2  | Bloomington<br>Drosophila Stock<br>Center | BDSC:33759;<br>FlyBase:FBst0033759<br>; |
| <i>D. melanogaster</i> . Expresses dsRNA for RNAi of inaC (FBgn0004784) under UAS control in the VALIUM20 vector.: y[1] v[1]; P{y[+t7.7] v[+t1.8]=TRiP.JF02958}attP2/TM3, Sb[1]     | Bloomington<br>Drosophila Stock<br>Center | BDSC:33768;<br>FlyBase:FBst0033768<br>; |
| <i>D. melanogaster</i> . Expresses dsRNA for RNAi of wg (FBgn0284084) under UAS control in the VALIUM20 vector.: y[1] sc[*] v[1] sev[21]; P{y[+t7.7] v[+t1.8]=TRiP.HMS00844}attP2   | Bloomington<br>Drosophila Stock<br>Center | BDSC:33902;<br>FlyBase:FBst0033902<br>; |
| <i>D. melanogaster</i> . Expresses dsRNA for RNAi of srl (FBgn0037248) under UAS control in the VALIUM20 vector.: y[1] sc[*] v[1] sev[21]; P{y[+t7.7] v[+t1.8]=TRiP.HMS00858}attP2  | Bloomington<br>Drosophila Stock<br>Center | BDSC:33915;<br>FlyBase:FBst0033915<br>; |

|                                                                                                                                                                                      |                                           |                                         |
|--------------------------------------------------------------------------------------------------------------------------------------------------------------------------------------|-------------------------------------------|-----------------------------------------|
| <i>D. melanogaster</i> . Expresses dsRNA for RNAi of SkpC (FBgn0026175) under UAS control in the VALIUM20 vector.: y[1] sc[*] v[1] sev[21]; P{y[+t7.7] v[+t1.8]=TRiP.HMS00871}attP2  | Bloomington<br>Drosophila Stock<br>Center | BDSC:33925;<br>FlyBase:FBst0033925<br>; |
| <i>D. melanogaster</i> . Expresses dsRNA for RNAi of SPE (FBgn0039102) under UAS control in the VALIUM20 vector.: y[1] sc[*] v[1] sev[21]; P{y[+t7.7] v[+t1.8]=TRiP.HMS00873}attP2   | Bloomington<br>Drosophila Stock<br>Center | BDSC:33926;<br>FlyBase:FBst0033926<br>; |
| <i>D. melanogaster</i> . Expresses dsRNA for RNAi of Traf6 (FBgn0265464) under UAS control in the VALIUM20 vector.: y[1] sc[*] v[1] sev[21]; P{y[+t7.7] v[+t1.8]=TRiP.HMS00880}attP2 | Bloomington<br>Drosophila Stock<br>Center | BDSC:33931;<br>FlyBase:FBst0033931<br>; |
| <i>D. melanogaster</i> . Expresses dsRNA for RNAi of upd2 (FBgn0030904) under UAS control in the VALIUM20 vector.: y[1] sc[*] v[1] sev[21]; P{y[+t7.7] v[+t1.8]=TRiP.HMS00901}attP2  | Bloomington<br>Drosophila Stock<br>Center | BDSC:33949;<br>FlyBase:FBst0033949<br>; |
| <i>D. melanogaster</i> . Expresses dsRNA for RNAi of Tor (FBgn0021796) under UAS control in the VALIUM20 vector.: y[1] sc[*] v[1] sev[21]; P{y[+t7.7] v[+t1.8]=TRiP.HMS00904}attP2   | Bloomington<br>Drosophila Stock<br>Center | BDSC:33951;<br>FlyBase:FBst0033951<br>; |
| <i>D. melanogaster</i> . Expresses dsRNA for RNAi of dally (FBgn0263930) under UAS control in the VALIUM20 vector.: y[1] sc[*] v[1] sev[21]; P{y[+t7.7] v[+t1.8]=TRiP.HMS00905}attP2 | Bloomington<br>Drosophila Stock<br>Center | BDSC:33952;<br>FlyBase:FBst0033952<br>; |
| <i>D. melanogaster</i> . Expresses dsRNA for RNAi of Rheb (FBgn0041191) under UAS control in the VALIUM20 vector.: y[1] sc[*] v[1] sev[21]; P{y[+t7.7] v[+t1.8]=TRiP.HMS00923}attP2  | Bloomington<br>Drosophila Stock<br>Center | BDSC:33966;<br>FlyBase:FBst0033966<br>; |
| <i>D. melanogaster</i> . Expresses dsRNA for RNAi of Cat (FBgn0000261) under UAS control in the VALIUM20 vector.: y[1] sc[*] v[1] sev[21]; P{y[+t7.7] v[+t1.8]=TRiP.HMS00990}attP2   | Bloomington<br>Drosophila Stock<br>Center | BDSC:34020;<br>FlyBase:FBst0034020<br>; |
| <i>D. melanogaster</i> . Expresses dsRNA for RNAi of CycK (FBgn0025674) under UAS control in the VALIUM20 vector.: y[1] sc[*] v[1] sev[21]; P{y[+t7.7] v[+t1.8]=TRiP.HMS01003}attP2  | Bloomington<br>Drosophila Stock<br>Center | BDSC:34032;<br>FlyBase:FBst0034032<br>; |
| <i>D. melanogaster</i> . Expresses dsRNA for RNAi of wts (FBgn0011739) under UAS control in the VALIUM20 vector.: y[1] v[1]; P{y[+t7.7] v[+t1.8]=TRiP.HMS00026}attP2                 | Bloomington<br>Drosophila Stock<br>Center | BDSC:34064;<br>FlyBase:FBst0034064<br>; |
| <i>D. melanogaster</i> . Expresses dsRNA for RNAi of yki (FBgn0034970) under UAS control in the VALIUM20 vector.: y[1] v[1]; P{y[+t7.7] v[+t1.8]=TRiP.HMS00041}attP2                 | Bloomington<br>Drosophila Stock<br>Center | BDSC:34067;<br>FlyBase:FBst0034067<br>; |

|                                                                                                                                                                                              |                                           |                                         |
|----------------------------------------------------------------------------------------------------------------------------------------------------------------------------------------------|-------------------------------------------|-----------------------------------------|
| <i>D. melanogaster</i> . Expresses dsRNA for RNAi of <i>srp</i> (FBgn0003507) under UAS control in the VALIUM20 vector.: y[1] sc[*] v[1] sev[21]; P{y[+t7.7] v[+t1.8]=TRiP.HMS01083}attP2    | Bloomington<br>Drosophila Stock<br>Center | BDSC:34080;<br>FlyBase:FBst0034080<br>; |
| <i>D. melanogaster</i> . Expresses dsRNA for RNAi of <i>Fas2</i> (FBgn0000635) under UAS control in the VALIUM20 vector.: y[1] sc[*] v[1] sev[21]; P{y[+t7.7] v[+t1.8]=TRiP.HMS01098}attP2   | Bloomington<br>Drosophila Stock<br>Center | BDSC:34084;<br>FlyBase:FBst0034084<br>; |
| <i>D. melanogaster</i> . Expresses dsRNA for RNAi of <i>eIF4E1</i> (FBgn0015218) under UAS control in the VALIUM20 vector.: y[1] sc[*] v[1] sev[21]; P{y[+t7.7] v[+t1.8]=TRiP.HMS00969}attP2 | Bloomington<br>Drosophila Stock<br>Center | BDSC:34096;<br>FlyBase:FBst0034096<br>; |
| <i>D. melanogaster</i> . Expresses dsRNA for RNAi of <i>Sema1a</i> (FBgn0011259) under UAS control in the VALIUM20 vector.: y[1] sc[*] v[1] sev[21]; P{y[+t7.7] v[+t1.8]=TRiP.HMS01307}attP2 | Bloomington<br>Drosophila Stock<br>Center | BDSC:34320;<br>FlyBase:FBst0034320<br>; |
| <i>D. melanogaster</i> . Expresses dsRNA for RNAi of <i>fz</i> (FBgn0001085) under UAS control in the VALIUM20 vector.: y[1] sc[*] v[1] sev[21]; P{y[+t7.7] v[+t1.8]=TRiP.HMS01308}attP2     | Bloomington<br>Drosophila Stock<br>Center | BDSC:34321;<br>FlyBase:FBst0034321<br>; |
| <i>D. melanogaster</i> . Expresses dsRNA for RNAi of <i>fj</i> (FBgn0000658) under UAS control in the VALIUM20 vector.: y[1] sc[*] v[1] sev[21]; P{y[+t7.7] v[+t1.8]=TRiP.HMS01310}attP2     | Bloomington<br>Drosophila Stock<br>Center | BDSC:34323;<br>FlyBase:FBst0034323<br>; |
| <i>D. melanogaster</i> . Expresses dsRNA for RNAi of <i>eve</i> (FBgn0000606) under UAS control in the VALIUM20 vector.: y[1] sc[*] v[1] sev[21]; P{y[+t7.7] v[+t1.8]=TRiP.HMS01312}attP2    | Bloomington<br>Drosophila Stock<br>Center | BDSC:34325;<br>FlyBase:FBst0034325<br>; |
| <i>D. melanogaster</i> . Expresses dsRNA for RNAi of <i>tll</i> (FBgn0003720) under UAS control in the VALIUM20 vector.: y[1] sc[*] v[1] sev[21]; P{y[+t7.7] v[+t1.8]=TRiP.HMS01316}attP2    | Bloomington<br>Drosophila Stock<br>Center | BDSC:34329;<br>FlyBase:FBst0034329<br>; |
| <i>D. melanogaster</i> . Expresses dsRNA for RNAi of <i>aPKC</i> (FBgn0261854) under UAS control in the VALIUM20 vector.: y[1] sc[*] v[1] sev[21]; P{y[+t7.7] v[+t1.8]=TRiP.HMS01320}attP2   | Bloomington<br>Drosophila Stock<br>Center | BDSC:34332;<br>FlyBase:FBst0034332<br>; |
| <i>D. melanogaster</i> . Expresses dsRNA for RNAi of <i>Vang</i> (FBgn0015838) under UAS control in the VALIUM20 vector.: y[1] sc[*] v[1] sev[21]; P{y[+t7.7] v[+t1.8]=TRiP.HMS01343}attP2   | Bloomington<br>Drosophila Stock<br>Center | BDSC:34354;<br>FlyBase:FBst0034354<br>; |
| <i>D. melanogaster</i> . Expresses dsRNA for RNAi of <i>Lst8</i> (FBgn0264691) under UAS control in the VALIUM20 vector.: y[1] sc[*] v[1] sev[21]; P{y[+t7.7] v[+t1.8]=TRiP.HMS01350}attP2   | Bloomington<br>Drosophila Stock<br>Center | BDSC:34361;<br>FlyBase:FBst0034361<br>; |

|                                                                                                                                                                                                |                                           |                                         |
|------------------------------------------------------------------------------------------------------------------------------------------------------------------------------------------------|-------------------------------------------|-----------------------------------------|
| <i>D. melanogaster</i> . Expresses dsRNA for RNAi of Lkb1 (FBgn0038167) under UAS control in the VALIUM20 vector.: y[1] sc[*] v[1] sev[21]; P{y[+t7.7] v[+t1.8]=TRiP.HMS01351}attP2            | Bloomington<br>Drosophila Stock<br>Center | BDSC:34362;<br>FlyBase:FBst0034362<br>; |
| <i>D. melanogaster</i> . Expresses dsRNA for RNAi of puc (FBgn0243512) under UAS control in the VALIUM20 vector.: y[1] sc[*] v[1] sev[21]; P{y[+t7.7] v[+t1.8]=TRiP.HMS01386}attP2/TM3, Sb[1]  | Bloomington<br>Drosophila Stock<br>Center | BDSC:34392;<br>FlyBase:FBst0034392<br>; |
| <i>D. melanogaster</i> . Expresses dsRNA for RNAi of Sxl (FBgn0264270) under UAS control in the VALIUM20 vector.: y[1] sc[*] v[1] sev[21]; P{y[+t7.7] v[+t1.8]=TRiP.HMS00609}attP2             | Bloomington<br>Drosophila Stock<br>Center | BDSC:34393;<br>FlyBase:FBst0034393<br>; |
| <i>D. melanogaster</i> . Expresses dsRNA for RNAi of Cka (FBgn0044323) under UAS control in the VALIUM20 vector.: y[1] sc[*] v[1] sev[21]; P{y[+t7.7] v[+t1.8]=TRiP.HMS00081}attP2             | Bloomington<br>Drosophila Stock<br>Center | BDSC:34522;<br>FlyBase:FBst0034522<br>; |
| <i>D. melanogaster</i> . Expresses dsRNA for RNAi of bnl (FBgn0014135) under UAS control in the VALIUM20 vector.: y[1] sc[*] v[1] sev[21]; P{y[+t7.7] v[+t1.8]=TRiP.HMS01046}attP2             | Bloomington<br>Drosophila Stock<br>Center | BDSC:34572;<br>FlyBase:FBst0034572<br>; |
| <i>D. melanogaster</i> . Expresses dsRNA for RNAi of RagA-B (FBgn0037647) under UAS control in the VALIUM20 vector.: y[1] sc[*] v[1] sev[21]; P{y[+t7.7] v[+t1.8]=TRiP.HMS01064}attP2          | Bloomington<br>Drosophila Stock<br>Center | BDSC:34590;<br>FlyBase:FBst0034590<br>; |
| <i>D. melanogaster</i> . Expresses dsRNA for RNAi of Wbp2 (FBgn0036318) under UAS control in the VALIUM20 vector.: y[1] sc[*] v[1] sev[21]; P{y[+t7.7] v[+t1.8]=TRiP.HMS00563}attP2            | Bloomington<br>Drosophila Stock<br>Center | BDSC:34603;<br>FlyBase:FBst0034603<br>; |
| <i>D. melanogaster</i> . Expresses dsRNA for RNAi of pip (FBgn0003089) under UAS control in the VALIUM20 vector.: y[1] sc[*] v[1] sev[21]; P{y[+t7.7] v[+t1.8]=TRiP.HMS01288}attP2             | Bloomington<br>Drosophila Stock<br>Center | BDSC:34613;<br>FlyBase:FBst0034613<br>; |
| <i>D. melanogaster</i> . Expresses dsRNA for RNAi of dome (FBgn0043903) under UAS control in the VALIUM20 vector.: y[1] sc[*] v[1] sev[21]; P{y[+t7.7] v[+t1.8]=TRiP.HMS01293}attP2            | Bloomington<br>Drosophila Stock<br>Center | BDSC:34618;<br>FlyBase:FBst0034618<br>; |
| <i>D. melanogaster</i> . Expresses dsRNA for RNAi of Stlk (FBgn0046692) under UAS control in the VALIUM20 vector.: y[1] sc[*] v[1] sev[21]; P{y[+t7.7] v[+t1.8]=TRiP.HMS01295}attP2/TM3, Sb[1] | Bloomington<br>Drosophila Stock<br>Center | BDSC:34620;<br>FlyBase:FBst0034620<br>; |
| <i>D. melanogaster</i> . Expresses dsRNA for RNAi of slp1 (FBgn0003430) under UAS control in the VALIUM20 vector.: y[1] sc[*] v[1] sev[21]; P{y[+t7.7] v[+t1.8]=TRiP.HMS01107}attP2            | Bloomington<br>Drosophila Stock<br>Center | BDSC:34633;<br>FlyBase:FBst0034633<br>; |

|                                                                                                                                                                                               |                                           |                                         |
|-----------------------------------------------------------------------------------------------------------------------------------------------------------------------------------------------|-------------------------------------------|-----------------------------------------|
| <i>D. melanogaster</i> . Expresses dsRNA for RNAi of slp2 (FBgn0004567) under UAS control in the VALIUM20 vector.: y[1] sc[*] v[1] sev[21]; P{y[+t7.7] v[+t1.8]=TRiP.HMS01108}attP2           | Bloomington<br>Drosophila Stock<br>Center | BDSC:34634;<br>FlyBase:FBst0034634<br>; |
| <i>D. melanogaster</i> . Expresses dsRNA for RNAi of hth (FBgn0001235) under UAS control in the VALIUM20 vector.: y[1] sc[*] v[1] sev[21]; P{y[+t7.7] v[+t1.8]=TRiP.HMS01112}attP2            | Bloomington<br>Drosophila Stock<br>Center | BDSC:34637;<br>FlyBase:FBst0034637<br>; |
| <i>D. melanogaster</i> . Expresses dsRNA for RNAi of RhoGEF2 (FBgn0023172) under UAS control in the VALIUM20 vector.: y[1] sc[*] v[1] sev[21]; P{y[+t7.7] v[+t1.8]=TRiP.HMS01118}attP2        | Bloomington<br>Drosophila Stock<br>Center | BDSC:34643;<br>FlyBase:FBst0034643<br>; |
| <i>D. melanogaster</i> . Expresses dsRNA for RNAi of Wnt5 (FBgn0010194) under UAS control in the VALIUM20 vector.: y[1] sc[*] v[1] sev[21]; P{y[+t7.7] v[+t1.8]=TRiP.HMS01119}attP2           | Bloomington<br>Drosophila Stock<br>Center | BDSC:34644;<br>FlyBase:FBst0034644<br>; |
| <i>D. melanogaster</i> . Expresses dsRNA for RNAi of spi (FBgn0005672) under UAS control in the VALIUM20 vector.: y[1] sc[*] v[1] sev[21]; P{y[+t7.7] v[+t1.8]=TRiP.HMS01120}attP2            | Bloomington<br>Drosophila Stock<br>Center | BDSC:34645;<br>FlyBase:FBst0034645<br>; |
| <i>D. melanogaster</i> . Expresses dsRNA for RNAi of Galphao (FBgn0001122) under UAS control in the VALIUM20 vector.: y[1] sc[*] v[1] sev[21]; P{y[+t7.7] v[+t1.8]=TRiP.HMS01129}attP2        | Bloomington<br>Drosophila Stock<br>Center | BDSC:34653;<br>FlyBase:FBst0034653<br>; |
| <i>D. melanogaster</i> . Expresses dsRNA for RNAi of shn (FBgn0003396) under UAS control in the VALIUM20 vector.: y[1] sc[*] v[1] sev[21]; P{y[+t7.7] v[+t1.8]=TRiP.HMS01167}attP2/TM3, Sb[1] | Bloomington<br>Drosophila Stock<br>Center | BDSC:34689;<br>FlyBase:FBst0034689<br>; |
| <i>D. melanogaster</i> . Expresses dsRNA for RNAi of Ser (FBgn0004197) under UAS control in the VALIUM20 vector.: y[1] sc[*] v[1] sev[21]; P{y[+t7.7] v[+t1.8]=TRiP.HMS01179}attP2            | Bloomington<br>Drosophila Stock<br>Center | BDSC:34700;<br>FlyBase:FBst0034700<br>; |
| <i>D. melanogaster</i> . Expresses dsRNA for RNAi of H (FBgn0001169) under UAS control in the VALIUM20 vector.: y[1] sc[*] v[1] sev[21]; P{y[+t7.7] v[+t1.8]=TRiP.HMS01182}attP2              | Bloomington<br>Drosophila Stock<br>Center | BDSC:34703;<br>FlyBase:FBst0034703<br>; |
| <i>D. melanogaster</i> . Expresses dsRNA for RNAi of opa (FBgn0003002) under UAS control in the VALIUM20 vector.: y[1] sc[*] v[1] sev[21]; P{y[+t7.7] v[+t1.8]=TRiP.HMS01185}attP2/TM3, Sb[1] | Bloomington<br>Drosophila Stock<br>Center | BDSC:34706;<br>FlyBase:FBst0034706<br>; |
| <i>D. melanogaster</i> . Expresses dsRNA for RNAi of Pkc53E (FBgn0003091) under UAS control in the VALIUM20 vector.: y[1] sc[*] v[1] sev[21]; P{y[+t7.7] v[+t1.8]=TRiP.HMS01195}attP2         | Bloomington<br>Drosophila Stock<br>Center | BDSC:34716;<br>FlyBase:FBst0034716<br>; |



|                                                                                                                                                                                                |                                           |                                         |
|------------------------------------------------------------------------------------------------------------------------------------------------------------------------------------------------|-------------------------------------------|-----------------------------------------|
| <i>D. melanogaster</i> . Expresses dsRNA for RNAi of hkb (FBgn0261434) under UAS control in the VALIUM20 vector.: y[1] sc[*] v[1] sev[21]; P{y[+t7.7] v[+t1.8]=TRiP.HMS01216}attP2/TM3, Sb[1]  | Bloomington<br>Drosophila Stock<br>Center | BDSC:34736;<br>FlyBase:FBst0034736<br>; |
| <i>D. melanogaster</i> . Expresses dsRNA for RNAi of gig (FBgn0005198) under UAS control in the VALIUM20 vector.: y[1] sc[*] v[1] sev[21]; P{y[+t7.7] v[+t1.8]=TRiP.HMS01217}attP2/TM3, Sb[1]  | Bloomington<br>Drosophila Stock<br>Center | BDSC:34737;<br>FlyBase:FBst0034737<br>; |
| <i>D. melanogaster</i> . Expresses dsRNA for RNAi of ken (FBgn0011236) under UAS control in the VALIUM20 vector.: y[1] sc[*] v[1] sev[21]; P{y[+t7.7] v[+t1.8]=TRiP.HMS01219}attP2             | Bloomington<br>Drosophila Stock<br>Center | BDSC:34739;<br>FlyBase:FBst0034739<br>; |
| <i>D. melanogaster</i> . Expresses dsRNA for RNAi of cact (FBgn0000250) under UAS control in the VALIUM20 vector.: y[1] sc[*] v[1] sev[21]; P{y[+t7.7] v[+t1.8]=TRiP.HMS00084}attP2            | Bloomington<br>Drosophila Stock<br>Center | BDSC:34775;<br>FlyBase:FBst0034775<br>; |
| <i>D. melanogaster</i> . Expresses dsRNA for RNAi of Bx42 (FBgn0004856) under UAS control in the VALIUM20 vector.: y[1] sc[*] v[1] sev[21]; P{y[+t7.7] v[+t1.8]=TRiP.HMS00086}attP2            | Bloomington<br>Drosophila Stock<br>Center | BDSC:34777;<br>FlyBase:FBst0034777<br>; |
| <i>D. melanogaster</i> . Expresses dsRNA for RNAi of Rpt2 (FBgn0015282) under UAS control in the VALIUM20 vector.: y[1] sc[*] v[1] sev[21]; P{y[+t7.7] v[+t1.8]=TRiP.HMS00104}attP2            | Bloomington<br>Drosophila Stock<br>Center | BDSC:34795;<br>FlyBase:FBst0034795<br>; |
| <i>D. melanogaster</i> . Expresses dsRNA for RNAi of Skp2 (FBgn0037236) under UAS control in the VALIUM20 vector.: y[1] sc[*] v[1] sev[21]; P{y[+t7.7] v[+t1.8]=TRiP.HMS00116}attP2/TM3, Sb[1] | Bloomington<br>Drosophila Stock<br>Center | BDSC:34807;<br>FlyBase:FBst0034807<br>; |
| <i>D. melanogaster</i> . Expresses dsRNA for RNAi of raptor (FBgn0029840) under UAS control in the VALIUM20 vector.: y[1] sc[*] v[1] sev[21]; P{y[+t7.7] v[+t1.8]=TRiP.HMS00124}attP2          | Bloomington<br>Drosophila Stock<br>Center | BDSC:34814;<br>FlyBase:FBst0034814<br>; |
| <i>D. melanogaster</i> . Expresses dsRNA for RNAi of Sos (FBgn0001965) under UAS control in the VALIUM20 vector.: y[1] sc[*] v[1] sev[21]; P{y[+t7.7] v[+t1.8]=TRiP.HMS00149}attP2             | Bloomington<br>Drosophila Stock<br>Center | BDSC:34833;<br>FlyBase:FBst0034833<br>; |
| <i>D. melanogaster</i> . Expresses dsRNA for RNAi of Gprk2 (FBgn0261988) under UAS control in the VALIUM20 vector.: y[1] sc[*] v[1] sev[21]; P{y[+t7.7] v[+t1.8]=TRiP.HMS00161}attP2           | Bloomington<br>Drosophila Stock<br>Center | BDSC:34843;<br>FlyBase:FBst0034843<br>; |
| <i>D. melanogaster</i> . Expresses dsRNA for RNAi of rl (FBgn0003256) under UAS control in the VALIUM20 vector.: y[1] sc[*] v[1] sev[21]; P{y[+t7.7] v[+t1.8]=TRiP.HMS00173}attP2              | Bloomington<br>Drosophila Stock<br>Center | BDSC:34855;<br>FlyBase:FBst0034855<br>; |

|                                                                                                                                                                                              |                                           |                                         |
|----------------------------------------------------------------------------------------------------------------------------------------------------------------------------------------------|-------------------------------------------|-----------------------------------------|
| <i>D. melanogaster</i> . Expresses dsRNA for RNAi of mwh (FBgn0264272) under UAS control in the VALIUM20 vector.: y[1] sc[*] v[1] sev[21]; P{y[+t7.7] v[+t1.8]=TRiP.HMS00180}attP2           | Bloomington<br>Drosophila Stock<br>Center | BDSC:34862;<br>FlyBase:FBst0034862<br>; |
| <i>D. melanogaster</i> . Expresses dsRNA for RNAi of Apc (FBgn0015589) under UAS control in the VALIUM20 vector.: y[1] sc[*] v[1] sev[21]; P{y[+t7.7] v[+t1.8]=TRiP.HMS00188}attP2           | Bloomington<br>Drosophila Stock<br>Center | BDSC:34869;<br>FlyBase:FBst0034869<br>; |
| <i>D. melanogaster</i> . Expresses dsRNA for RNAi of Tao (FBgn0031030) under UAS control in the VALIUM20 vector.: y[1] sc[*] v[1] sev[21]; P{y[+t7.7] v[+t1.8]=TRiP.HMS01226}attP2           | Bloomington<br>Drosophila Stock<br>Center | BDSC:34881;<br>FlyBase:FBst0034881<br>; |
| <i>D. melanogaster</i> . Expresses dsRNA for RNAi of 14-3-3epsilon (FBgn0020238) under UAS control in the VALIUM20 vector.: y[1] sc[*] v[1] sev[21]; P{y[+t7.7] v[+t1.8]=TRiP.HMS01229}attP2 | Bloomington<br>Drosophila Stock<br>Center | BDSC:34884;<br>FlyBase:FBst0034884<br>; |
| <i>D. melanogaster</i> . Expresses dsRNA for RNAi of Sara (FBgn0026369) under UAS control in the VALIUM20 vector.: y[1] sc[*] v[1] sev[21]; P{y[+t7.7] v[+t1.8]=TRiP.HMS01239}attP2          | Bloomington<br>Drosophila Stock<br>Center | BDSC:34894;<br>FlyBase:FBst0034894<br>; |
| <i>D. melanogaster</i> . Expresses dsRNA for RNAi of gbb (FBgn0024234) under UAS control in the VALIUM20 vector.: y[1] sc[*] v[1] sev[21]; P{y[+t7.7] v[+t1.8]=TRiP.HMS01243}attP2           | Bloomington<br>Drosophila Stock<br>Center | BDSC:34898;<br>FlyBase:FBst0034898<br>; |
| <i>D. melanogaster</i> . Expresses dsRNA for RNAi of Atg8b (FBgn0038539) under UAS control in the VALIUM20 vector.: y[1] sc[*] v[1] sev[21]; P{y[+t7.7] v[+t1.8]=TRiP.HMS01245}attP2         | Bloomington<br>Drosophila Stock<br>Center | BDSC:34900;<br>FlyBase:FBst0034900<br>; |
| <i>D. melanogaster</i> . Expresses dsRNA for RNAi of Rac1 (FBgn0010333) under UAS control in the VALIUM20 vector.: y[1] sc[*] v[1] sev[21]; P{y[+t7.7] v[+t1.8]=TRiP.HMS01258}attP2          | Bloomington<br>Drosophila Stock<br>Center | BDSC:34910;<br>FlyBase:FBst0034910<br>; |
| <i>D. melanogaster</i> . Expresses dsRNA for RNAi of ato (FBgn0010433) under UAS control in the VALIUM20 vector.: y[1] sc[*] v[1] sev[21]; P{y[+t7.7] v[+t1.8]=TRiP.HMS01278}attP2           | Bloomington<br>Drosophila Stock<br>Center | BDSC:34929;<br>FlyBase:FBst0034929<br>; |
| <i>D. melanogaster</i> . Expresses dsRNA for RNAi of dl (FBgn0260632) under UAS control in the VALIUM20 vector.: y[1] sc[*] v[1] sev[21]; P{y[+t7.7] v[+t1.8]=TRiP.HMS00028}attP2            | Bloomington<br>Drosophila Stock<br>Center | BDSC:34938;<br>FlyBase:FBst0034938<br>; |
| <i>D. melanogaster</i> . Expresses dsRNA for RNAi of Mer (FBgn0086384) under UAS control in the VALIUM20 vector.: y[1] sc[*] v[1] sev[21]; P{y[+t7.7] v[+t1.8]=TRiP.HMS00459}attP2           | Bloomington<br>Drosophila Stock<br>Center | BDSC:34958;<br>FlyBase:FBst0034958<br>; |



|                                                                                                                                                                                               |                                           |                                         |
|-----------------------------------------------------------------------------------------------------------------------------------------------------------------------------------------------|-------------------------------------------|-----------------------------------------|
| <i>D. melanogaster</i> . Expresses dsRNA for RNAi of mats (FBgn0038965) under UAS control in the VALIUM20 vector.: y[1] sc[*] v[1] sev[21]; P{y[+t7.7] v[+t1.8]=TRiP.HMS00475}attP2           | Bloomington<br>Drosophila Stock<br>Center | BDSC:34959;<br>FlyBase:FBst0034959<br>; |
| <i>D. melanogaster</i> . Expresses dsRNA for RNAi of ex (FBgn0004583) under UAS control in the VALIUM20 vector.: y[1] sc[*] v[1] sev[21]; P{y[+t7.7] v[+t1.8]=TRiP.HMS00874}attP2             | Bloomington<br>Drosophila Stock<br>Center | BDSC:34968;<br>FlyBase:FBst0034968<br>; |
| <i>D. melanogaster</i> . Expresses dsRNA for RNAi of ft (FBgn0001075) under UAS control in the VALIUM20 vector.: y[1] sc[*] v[1] sev[21]; P{y[+t7.7] v[+t1.8]=TRiP.HMS00932}attP2             | Bloomington<br>Drosophila Stock<br>Center | BDSC:34970;<br>FlyBase:FBst0034970<br>; |
| <i>D. melanogaster</i> . Expresses dsRNA for RNAi of msk (FBgn0026252) under UAS control in the VALIUM20 vector.: y[1] sc[*] v[1] sev[21]; P{y[+t7.7] v[+t1.8]=TRiP.HMS01408}attP2            | Bloomington<br>Drosophila Stock<br>Center | BDSC:34998;<br>FlyBase:FBst0034998<br>; |
| <i>D. melanogaster</i> . Expresses dsRNA for RNAi of baz (FBgn0000163) under UAS control in the VALIUM20 vector.: y[1] sc[*] v[1] sev[21]; P{y[+t7.7] v[+t1.8]=TRiP.HMS01412}attP2/TM3, Sb[1] | Bloomington<br>Drosophila Stock<br>Center | BDSC:35002;<br>FlyBase:FBst0035002<br>; |
| <i>D. melanogaster</i> . Expresses dsRNA for RNAi of arm (FBgn0000117) under UAS control in the VALIUM20 vector.: y[1] sc[*] v[1] sev[21]; P{y[+t7.7] v[+t1.8]=TRiP.HMS01414}attP2            | Bloomington<br>Drosophila Stock<br>Center | BDSC:35004;<br>FlyBase:FBst0035004<br>; |
| <i>D. melanogaster</i> . Expresses dsRNA for RNAi of Stam (FBgn0027363) under UAS control in the VALIUM20 vector.: y[1] sc[*] v[1] sev[21]; P{y[+t7.7] v[+t1.8]=TRiP.HMS01429}attP2           | Bloomington<br>Drosophila Stock<br>Center | BDSC:35016;<br>FlyBase:FBst0035016<br>; |
| <i>D. melanogaster</i> . Expresses dsRNA for RNAi of Gadd45 (FBgn0033153) under UAS control in the VALIUM20 vector.: y[1] sc[*] v[1] sev[21]; P{y[+t7.7] v[+t1.8]=TRiP.HMS01436}attP2         | Bloomington<br>Drosophila Stock<br>Center | BDSC:35023;<br>FlyBase:FBst0035023<br>; |
| <i>D. melanogaster</i> . Expresses dsRNA for RNAi of htl (FBgn0010389) under UAS control in the VALIUM20 vector.: y[1] sc[*] v[1] sev[21]; P{y[+t7.7] v[+t1.8]=TRiP.HMS01437}attP2            | Bloomington<br>Drosophila Stock<br>Center | BDSC:35024;<br>FlyBase:FBst0035024<br>; |
| <i>D. melanogaster</i> . Expresses dsRNA for RNAi of tsh (FBgn0003866) under UAS control in the VALIUM20 vector.: y[1] sc[*] v[1] sev[21]; P{y[+t7.7] v[+t1.8]=TRiP.HMS01443}attP2            | Bloomington<br>Drosophila Stock<br>Center | BDSC:35030;<br>FlyBase:FBst0035030<br>; |
| <i>D. melanogaster</i> . Expresses dsRNA for RNAi of Socs36E (FBgn0041184) under UAS control in the VALIUM20 vector.: y[1] sc[*] v[1] sev[21]; P{y[+t7.7] v[+t1.8]=TRiP.HMS01450}attP2        | Bloomington<br>Drosophila Stock<br>Center | BDSC:35036;<br>FlyBase:FBst0035036<br>; |

|                                                                                                                                                                                              |                                           |                                         |
|----------------------------------------------------------------------------------------------------------------------------------------------------------------------------------------------|-------------------------------------------|-----------------------------------------|
| <i>D. melanogaster</i> . Expresses dsRNA for RNAi of Cad99C (FBgn0039709) under UAS control in the VALIUM20 vector.: y[1] sc[*] v[1] sev[21]; P{y[+t7.7] v[+t1.8]=TRiP.HMS01451}attP2        | Bloomington<br>Drosophila Stock<br>Center | BDSC:35037;<br>FlyBase:FBst0035037<br>; |
| <i>D. melanogaster</i> . Expresses dsRNA for RNAi of pnt (FBgn0003118) under UAS control in the VALIUM20 vector.: y[1] sc[*] v[1] sev[21]; P{y[+t7.7] v[+t1.8]=TRiP.HMS01452}attP2           | Bloomington<br>Drosophila Stock<br>Center | BDSC:35038;<br>FlyBase:FBst0035038<br>; |
| <i>D. melanogaster</i> . Expresses dsRNA for RNAi of numb (FBgn0002973) under UAS control in the VALIUM20 vector.: y[1] sc[*] v[1] sev[21]; P{y[+t7.7] v[+t1.8]=TRiP.HMS01459}attP2          | Bloomington<br>Drosophila Stock<br>Center | BDSC:35045;<br>FlyBase:FBst0035045<br>; |
| <i>D. melanogaster</i> . Expresses dsRNA for RNAi of stan (FBgn0024836) under UAS control in the VALIUM20 vector.: y[1] sc[*] v[1] sev[21]; P{y[+t7.7] v[+t1.8]=TRiP.HMS01464}attP2          | Bloomington<br>Drosophila Stock<br>Center | BDSC:35050;<br>FlyBase:FBst0035050<br>; |
| <i>D. melanogaster</i> . Expresses dsRNA for RNAi of dco (FBgn0002413) under UAS control in the VALIUM22 vector.: y[1] sc[*] v[1] sev[21]; P{y[+t7.7] v[+t1.8]=TRiP.GL00001}attP2/TM3, Sb[1] | Bloomington<br>Drosophila Stock<br>Center | BDSC:35134;<br>FlyBase:FBst0035134<br>; |
| <i>D. melanogaster</i> . Expresses dsRNA for RNAi of CkIIalpha (FBgn0264492) under UAS control in the VALIUM22 vector.: y[1] sc[*] v[1] sev[21]; P{y[+t7.7] v[+t1.8]=TRiP.GL00003}attP2      | Bloomington<br>Drosophila Stock<br>Center | BDSC:35136;<br>FlyBase:FBst0035136<br>; |
| <i>D. melanogaster</i> . Expresses dsRNA for RNAi of gish (FBgn0250823) under UAS control in the VALIUM22 vector.: y[1] sc[*] v[1] sev[21]; P{y[+t7.7] v[+t1.8]=TRiP.GL00005}attP2           | Bloomington<br>Drosophila Stock<br>Center | BDSC:35138;<br>FlyBase:FBst0035138<br>; |
| <i>D. melanogaster</i> . Expresses dsRNA for RNAi of Mkk4 (FBgn0024326) under UAS control in the VALIUM22 vector.: y[1] sc[*] v[1] sev[21]; P{y[+t7.7] v[+t1.8]=TRiP.GL00010}attP2           | Bloomington<br>Drosophila Stock<br>Center | BDSC:35143;<br>FlyBase:FBst0035143<br>; |
| <i>D. melanogaster</i> . Expresses dsRNA for RNAi of CkIalpha (FBgn0015024) under UAS control in the VALIUM22 vector.: y[1] sc[*] v[1] sev[21]; P{y[+t7.7] v[+t1.8]=TRiP.GL00021}attP2       | Bloomington<br>Drosophila Stock<br>Center | BDSC:35153;<br>FlyBase:FBst0035153<br>; |
| <i>D. melanogaster</i> . Expresses dsRNA for RNAi of lic (FBgn0261524) under UAS control in the VALIUM22 vector.: y[1] sc[*] v[1] sev[21]; P{y[+t7.7] v[+t1.8]=TRiP.GL00022}attP2/TM3, Sb[1] | Bloomington<br>Drosophila Stock<br>Center | BDSC:35154;<br>FlyBase:FBst0035154<br>; |
| <i>D. melanogaster</i> . Expresses dsRNA for RNAi of Btk29A (FBgn0003502) under UAS control in the VALIUM22 vector.: y[1] sc[*] v[1] sev[21]; P{y[+t7.7] v[+t1.8]=TRiP.GL00027}attP2         | Bloomington<br>Drosophila Stock<br>Center | BDSC:35159;<br>FlyBase:FBst0035159<br>; |

|                                                                                                                                                                                              |                                           |                                         |
|----------------------------------------------------------------------------------------------------------------------------------------------------------------------------------------------|-------------------------------------------|-----------------------------------------|
| <i>D. melanogaster</i> . Expresses dsRNA for RNAi of alc (FBgn0260972) under UAS control in the VALIUM22 vector.: y[1] sc[*] v[1] sev[21]; P{y[+t7.7] v[+t1.8]=TRiP.GL00029}attP2/TM3, Sb[1] | Bloomington<br>Drosophila Stock<br>Center | BDSC:35161;<br>FlyBase:FBst0035161<br>; |
| <i>D. melanogaster</i> . Expresses dsRNA for RNAi of Pka-C1 (FBgn0000273) under UAS control in the VALIUM22 vector.: y[1] sc[*] v[1] sev[21]; P{y[+t7.7] v[+t1.8]=TRiP.GL00038}attP2         | Bloomington<br>Drosophila Stock<br>Center | BDSC:35169;<br>FlyBase:FBst0035169<br>; |
| <i>D. melanogaster</i> . Expresses dsRNA for RNAi of hpo (FBgn0261456) under UAS control in the VALIUM22 vector.: y[1] sc[*] v[1] sev[21]; P{y[+t7.7] v[+t1.8]=TRiP.GL00046}attP2            | Bloomington<br>Drosophila Stock<br>Center | BDSC:35176;<br>FlyBase:FBst0035176<br>; |
| <i>D. melanogaster</i> . Expresses dsRNA for RNAi of IKKbeta (FBgn0024222) under UAS control in the VALIUM22 vector.: y[1] sc[*] v[1] sev[21]; P{y[+t7.7] v[+t1.8]=TRiP.GL00058}attP2        | Bloomington<br>Drosophila Stock<br>Center | BDSC:35186;<br>FlyBase:FBst0035186<br>; |
| <i>D. melanogaster</i> . Expresses dsRNA for RNAi of Aduk (FBgn0037679) under UAS control in the VALIUM22 vector.: y[1] sc[*] v[1] sev[21]; P{y[+t7.7] v[+t1.8]=TRiP.GL00059}attP2           | Bloomington<br>Drosophila Stock<br>Center | BDSC:35187;<br>FlyBase:FBst0035187<br>; |
| <i>D. melanogaster</i> . Expresses dsRNA for RNAi of put (FBgn0003169) under UAS control in the VALIUM22 vector.: y[1] sc[*] v[1] sev[21]; P{y[+t7.7] v[+t1.8]=TRiP.GL00069}attP2            | Bloomington<br>Drosophila Stock<br>Center | BDSC:35195;<br>FlyBase:FBst0035195<br>; |
| <i>D. melanogaster</i> . Expresses dsRNA for RNAi of hep (FBgn0010303) under UAS control in the VALIUM22 vector.: y[1] sc[*] v[1] sev[21]; P{y[+t7.7] v[+t1.8]=TRiP.GL00089}attP2            | Bloomington<br>Drosophila Stock<br>Center | BDSC:35210;<br>FlyBase:FBst0035210<br>; |
| <i>D. melanogaster</i> . Expresses dsRNA for RNAi of brm (FBgn0000212) under UAS control in the VALIUM22 vector.: y[1] sc[*] v[1] sev[21]; P{y[+t7.7] v[+t1.8]=TRiP.GL00090}attP2            | Bloomington<br>Drosophila Stock<br>Center | BDSC:35211;<br>FlyBase:FBst0035211<br>; |
| <i>D. melanogaster</i> . Expresses dsRNA for RNAi of pyd (FBgn0262614) under UAS control in the VALIUM22 vector.: y[1] sc[*] v[1] sev[21]; P{y[+t7.7] v[+t1.8]=TRiP.GL00109}attP2            | Bloomington<br>Drosophila Stock<br>Center | BDSC:35225;<br>FlyBase:FBst0035225<br>; |
| <i>D. melanogaster</i> . Expresses dsRNA for RNAi of hyx (FBgn0037657) under UAS control in the VALIUM22 vector.: y[1] sc[*] v[1] sev[21]; P{y[+t7.7] v[+t1.8]=TRiP.GL00123}attP2            | Bloomington<br>Drosophila Stock<br>Center | BDSC:35238;<br>FlyBase:FBst0035238<br>; |
| <i>D. melanogaster</i> . Expresses dsRNA for RNAi of p38a (FBgn0015765) under UAS control in the VALIUM22 vector.: y[1] sc[*] v[1] sev[21]; P{y[+t7.7] v[+t1.8]=TRiP.GL00131}attP2           | Bloomington<br>Drosophila Stock<br>Center | BDSC:35244;<br>FlyBase:FBst0035244<br>; |

|                                                                                                                                                                                                 |                                           |                                         |
|-------------------------------------------------------------------------------------------------------------------------------------------------------------------------------------------------|-------------------------------------------|-----------------------------------------|
| <i>D. melanogaster</i> . Expresses dsRNA for RNAi of p38b (FBgn0024846) under UAS control in the VALIUM22 vector.: y[1] sc[*] v[1] sev[21]; P{y[+t7.7] v[+t1.8]=TRiP.GL00140}attP2              | Bloomington<br>Drosophila Stock<br>Center | BDSC:35252;<br>FlyBase:FBst0035252<br>; |
| <i>D. melanogaster</i> . Expresses dsRNA for RNAi of app (FBgn0260941) under UAS control in the VALIUM22 vector.: y[1] sc[*] v[1] sev[21]; P{y[+t7.7] v[+t1.8]=TRiP.GL00181}attP2               | Bloomington<br>Drosophila Stock<br>Center | BDSC:35280;<br>FlyBase:FBst0035280<br>; |
| <i>D. melanogaster</i> . Expresses dsRNA for RNAi of sdt (FBgn0261873) under UAS control in the VALIUM22 vector.: y[1] sc[*] v[1] sev[21]; P{y[+t7.7] v[+t1.8]=TRiP.GL00193}attP2               | Bloomington<br>Drosophila Stock<br>Center | BDSC:35291;<br>FlyBase:FBst0035291<br>; |
| <i>D. melanogaster</i> . Expresses dsRNA for RNAi of aux (FBgn0037218) under UAS control in the VALIUM22 vector.: y[1] sc[*] v[1] sev[21]; P{y[+t7.7] v[+t1.8]=TRiP.GL00213}attP2               | Bloomington<br>Drosophila Stock<br>Center | BDSC:35310;<br>FlyBase:FBst0035310<br>; |
| <i>D. melanogaster</i> . Expresses dsRNA for RNAi of CaMKII (FBgn0264607) under UAS control in the VALIUM22 vector.: y[1] sc[*] v[1] sev[21]; P{y[+t7.7] v[+t1.8]=TRiP.GL00237}attP2/TM3, Sb[1] | Bloomington<br>Drosophila Stock<br>Center | BDSC:35330;<br>FlyBase:FBst0035330<br>; |
| <i>D. melanogaster</i> . Expresses dsRNA for RNAi of Ask1 (FBgn0014006) under UAS control in the VALIUM22 vector.: y[1] sc[*] v[1] sev[21]; P{y[+t7.7] v[+t1.8]=TRiP.GL00238}attP2              | Bloomington<br>Drosophila Stock<br>Center | BDSC:35331;<br>FlyBase:FBst0035331<br>; |
| <i>D. melanogaster</i> . Expresses dsRNA for RNAi of SAK (FBgn0026371) under UAS control in the VALIUM22 vector.: y[1] sc[*] v[1] sev[21]; P{y[+t7.7] v[+t1.8]=TRiP.GL00244}attP2/TM3, Sb[1]    | Bloomington<br>Drosophila Stock<br>Center | BDSC:35335;<br>FlyBase:FBst0035335<br>; |
| <i>D. melanogaster</i> . Expresses dsRNA for RNAi of sgg (FBgn0003371) under UAS control in the VALIUM22 vector.: y[1] sc[*] v[1] sev[21]; P{y[+t7.7] v[+t1.8]=TRiP.GL00277}attP2               | Bloomington<br>Drosophila Stock<br>Center | BDSC:35364;<br>FlyBase:FBst0035364<br>; |
| <i>D. melanogaster</i> . Expresses dsRNA for RNAi of hop (FBgn0004864) under UAS control in the VALIUM22 vector.: y[1] sc[*] v[1] sev[21]; P{y[+t7.7] v[+t1.8]=TRiP.GL00305}attP2               | Bloomington<br>Drosophila Stock<br>Center | BDSC:35386;<br>FlyBase:FBst0035386<br>; |
| <i>D. melanogaster</i> . Expresses dsRNA for RNAi of Mekk1 (FBgn0024329) under UAS control in the VALIUM22 vector.: y[1] sc[*] v[1] sev[21]; P{y[+t7.7] v[+t1.8]=TRiP.GL00322}attP2             | Bloomington<br>Drosophila Stock<br>Center | BDSC:35402;<br>FlyBase:FBst0035402<br>; |
| <i>D. melanogaster</i> . Expresses dsRNA for RNAi of aop (FBgn0000097) under UAS control in the VALIUM22 vector.: y[1] sc[*] v[1] sev[21]; P{y[+t7.7] v[+t1.8]=TRiP.GL00324}attP2               | Bloomington<br>Drosophila Stock<br>Center | BDSC:35404;<br>FlyBase:FBst0035404<br>; |

|                                                                                                                                                                                                 |                                           |                                         |
|-------------------------------------------------------------------------------------------------------------------------------------------------------------------------------------------------|-------------------------------------------|-----------------------------------------|
| <i>D. melanogaster</i> . Expresses dsRNA for RNAi of Ras85D (FBgn0003205) under UAS control in the VALIUM22 vector.: y[1] sc[*] v[1] sev[21]; P{y[+t7.7] v[+t1.8]=TRiP.GL00336}attP2/TM3, Sb[1] | Bloomington<br>Drosophila Stock<br>Center | BDSC:35414;<br>FlyBase:FBst0035414<br>; |
| <i>D. melanogaster</i> . Expresses dsRNA for RNAi of Nap1 (FBgn0015268) under UAS control in the VALIUM22 vector.: y[1] sc[*] v[1] sev[21]; P{y[+t7.7] v[+t1.8]=TRiP.GL00370}attP2              | Bloomington<br>Drosophila Stock<br>Center | BDSC:35445;<br>FlyBase:FBst0035445<br>; |
| <i>D. melanogaster</i> . Expresses dsRNA for RNAi of osa (FBgn0261885) under UAS control in the VALIUM22 vector.: y[1] sc[*] v[1] sev[21]; P{y[+t7.7] v[+t1.8]=TRiP.GL00372}attP2               | Bloomington<br>Drosophila Stock<br>Center | BDSC:35447;<br>FlyBase:FBst0035447<br>; |
| <i>D. melanogaster</i> . Expresses dsRNA for RNAi of key (FBgn0041205) under UAS control in the VALIUM22 vector.: y[1] sc[*] v[1] sev[21]; P{y[+t7.7] v[+t1.8]=TRiP.GL00088}attP2               | Bloomington<br>Drosophila Stock<br>Center | BDSC:35572;<br>FlyBase:FBst0035572<br>; |
| <i>D. melanogaster</i> . Expresses dsRNA for RNAi of Stat92E (FBgn0016917) under UAS control in the VALIUM22 vector.: y[1] sc[*] v[1] sev[21]; P{y[+t7.7] v[+t1.8]=TRiP.GL00437}attP40/CyO      | Bloomington<br>Drosophila Stock<br>Center | BDSC:35600;<br>FlyBase:FBst0035600<br>; |
| <i>D. melanogaster</i> . Expresses dsRNA for RNAi of Gcn5 (FBgn0020388) under UAS control in the VALIUM22 vector.: y[1] sc[*] v[1] sev[21]; P{y[+t7.7] v[+t1.8]=TRiP.GL00439}attP40             | Bloomington<br>Drosophila Stock<br>Center | BDSC:35601;<br>FlyBase:FBst0035601<br>; |
| <i>D. melanogaster</i> . Expresses dsRNA for RNAi of TER94 (FBgn0261014) under UAS control in the VALIUM22 vector.: y[1] sc[*] v[1] sev[21]; P{y[+t7.7] v[+t1.8]=TRiP.GL00448}attP2             | Bloomington<br>Drosophila Stock<br>Center | BDSC:35608;<br>FlyBase:FBst0035608<br>; |
| <i>D. melanogaster</i> . Expresses dsRNA for RNAi of wek (FBgn0001990) under UAS control in the VALIUM21 vector.: y[1] sc[*] v[1] sev[21]; P{y[+t7.7] v[+t1.8]=TRiP.GLV21045}attP2              | Bloomington<br>Drosophila Stock<br>Center | BDSC:35680;<br>FlyBase:FBst0035680<br>; |
| <i>D. melanogaster</i> . Expresses dsRNA for RNAi of bab2 (FBgn0025525) under UAS control in the VALIUM21 vector.: y[1] sc[*] v[1] sev[21]; P{y[+t7.7] v[+t1.8]=TRiP.GLV21085}attP2             | Bloomington<br>Drosophila Stock<br>Center | BDSC:35720;<br>FlyBase:FBst0035720<br>; |
| <i>D. melanogaster</i> . Expresses dsRNA for RNAi of Patj (FBgn0067864) under UAS control in the VALIUM20 vector.: y[1] sc[*] v[1] sev[21]; P{y[+t7.7] v[+t1.8]=TRiP.HMS01489}attP2             | Bloomington<br>Drosophila Stock<br>Center | BDSC:35747;<br>FlyBase:FBst0035747<br>; |
| <i>D. melanogaster</i> . Expresses dsRNA for RNAi of Mtl (FBgn0039532) under UAS control in the VALIUM20 vector.: y[1] sc[*] v[1] sev[21]; P{y[+t7.7] v[+t1.8]=TRiP.HMS01500}attP2              | Bloomington<br>Drosophila Stock<br>Center | BDSC:35754;<br>FlyBase:FBst0035754<br>; |



|                                                                                                                                                                                                 |                                           |                                         |
|-------------------------------------------------------------------------------------------------------------------------------------------------------------------------------------------------|-------------------------------------------|-----------------------------------------|
| <i>D. melanogaster</i> . Expresses dsRNA for RNAi of gro (FBgn0001139) under UAS control in the VALIUM20 vector.: y[1] sc[*] v[1] sev[21]; P{y[+t7.7] v[+t1.8]=TRiP.HMS01506}attP2              | Bloomington<br>Drosophila Stock<br>Center | BDSC:35759;<br>FlyBase:FBst0035759<br>; |
| <i>D. melanogaster</i> . Expresses dsRNA for RNAi of Wnt6 (FBgn0031902) under UAS control in the VALIUM22 vector.: y[1] sc[*] v[1] sev[21]; P{y[+t7.7] v[+t1.8]=TRiP.GL00457}attP2              | Bloomington<br>Drosophila Stock<br>Center | BDSC:35808;<br>FlyBase:FBst0035808<br>; |
| <i>D. melanogaster</i> . Expresses dsRNA for RNAi of CycE (FBgn0010382) under UAS control in the VALIUM22 vector.: y[1] sc[*] v[1] sev[21]; P{y[+t7.7] v[+t1.8]=TRiP.GL00511}attP40             | Bloomington<br>Drosophila Stock<br>Center | BDSC:36092;<br>FlyBase:FBst0036092<br>; |
| <i>D. melanogaster</i> . Expresses dsRNA for RNAi of Myd88 (FBgn0033402) under UAS control in the VALIUM20 vector.: y[1] sc[*] v[1] sev[21]; P{y[+t7.7] v[+t1.8]=TRiP.HMS00183}attP2            | Bloomington<br>Drosophila Stock<br>Center | BDSC:36107;<br>FlyBase:FBst0036107<br>; |
| <i>D. melanogaster</i> . Expresses dsRNA for RNAi of Cul1 (FBgn0015509) under UAS control in the VALIUM22 vector.: y[1] sc[*] v[1] sev[21]; P{y[+t7.7] v[+t1.8]=TRiP.GL00561}attP2              | Bloomington<br>Drosophila Stock<br>Center | BDSC:36601;<br>FlyBase:FBst0036601<br>; |
| <i>D. melanogaster</i> . Expresses dsRNA for RNAi of chico (FBgn0024248) under UAS control in the VALIUM20 vector.: y[1] sc[*] v[1] sev[21]; P{y[+t7.7] v[+t1.8]=TRiP.HMS01553}attP2/TM3, Sb[1] | Bloomington<br>Drosophila Stock<br>Center | BDSC:36665;<br>FlyBase:FBst0036665<br>; |
| <i>D. melanogaster</i> . Expresses dsRNA for RNAi of Rbf2 (FBgn0038390) under UAS control in the VALIUM20 vector.: y[1] sc[*] v[1] sev[21]; P{y[+t7.7] v[+t1.8]=TRiP.HMS01586}attP2             | Bloomington<br>Drosophila Stock<br>Center | BDSC:36697;<br>FlyBase:FBst0036697<br>; |
| <i>D. melanogaster</i> . Expresses dsRNA for RNAi of rictor (FBgn0031006) under UAS control in the VALIUM20 vector.: y[1] sc[*] v[1] sev[21]; P{y[+t7.7] v[+t1.8]=TRiP.HMS01588}attP2           | Bloomington<br>Drosophila Stock<br>Center | BDSC:36699;<br>FlyBase:FBst0036699<br>; |
| <i>D. melanogaster</i> . Expresses dsRNA for RNAi of sty (FBgn0014388) under UAS control in the VALIUM20 vector.: y[1] sc[*] v[1] sev[21]; P{y[+t7.7] v[+t1.8]=TRiP.HMS01599}attP2              | Bloomington<br>Drosophila Stock<br>Center | BDSC:36709;<br>FlyBase:FBst0036709<br>; |
| <i>D. melanogaster</i> . Expresses dsRNA for RNAi of Zyx (FBgn0011642) under UAS control in the VALIUM20 vector.: y[1] sc[*] v[1] sev[21]; P{y[+t7.7] v[+t1.8]=TRiP.HMS01606}attP40             | Bloomington<br>Drosophila Stock<br>Center | BDSC:36716;<br>FlyBase:FBst0036716<br>; |
| <i>D. melanogaster</i> . Expresses dsRNA for RNAi of Wnt2 (FBgn0004360) under UAS control in the VALIUM20 vector.: y[1] sc[*] v[1] sev[21]; P{y[+t7.7] v[+t1.8]=TRiP.HMS01613}attP2             | Bloomington<br>Drosophila Stock<br>Center | BDSC:36722;<br>FlyBase:FBst0036722<br>; |

|                                                                                                                                                                                              |                                           |                                         |
|----------------------------------------------------------------------------------------------------------------------------------------------------------------------------------------------|-------------------------------------------|-----------------------------------------|
| <i>D. melanogaster</i> . Expresses dsRNA for RNAi of Rbf (FBgn0015799) under UAS control in the VALIUM20 vector.: y[1] sc[*] v[1] sev[21]; P{y[+7.7] v[+t1.8]=TRiP.HMS03004}attP2/TM3, Sb[1] | Bloomington<br>Drosophila Stock<br>Center | BDSC:36744;<br>FlyBase:FBst0036744<br>; |
| <i>D. melanogaster</i> . Expresses dsRNA for RNAi of dlg1 (FBgn0001624) under UAS control in the VALIUM20 vector.: y[1] v[1]; P{y[+7.7] v[+t1.8]=TRiP.JF02287}attP2                          | Bloomington<br>Drosophila Stock<br>Center | BDSC:36771;<br>FlyBase:FBst0036771<br>; |
| <i>D. melanogaster</i> . Expresses dsRNA for RNAi of dpp (FBgn0000490) under UAS control in the VALIUM20 vector.: y[1] v[1]; P{y[+7.7] v[+t1.8]=TRiP.JF02455}attP2                           | Bloomington<br>Drosophila Stock<br>Center | BDSC:36779;<br>FlyBase:FBst0036779<br>; |
| <i>D. melanogaster</i> . Expresses dsRNA for RNAi of DI (FBgn0000463) under UAS control in the VALIUM22 vector.: y[1] sc[*] v[1] sev[21]; P{y[+7.7] v[+t1.8]=TRiP.GL00520}attP40             | Bloomington<br>Drosophila Stock<br>Center | BDSC:36784;<br>FlyBase:FBst0036784<br>; |
| <i>D. melanogaster</i> . Expresses dsRNA for RNAi of HDAC1 (FBgn0015805) under UAS control in the VALIUM22 vector.: y[1] sc[*] v[1] sev[21]; P{y[+7.7] v[+t1.8]=TRiP.GL01005}attP40          | Bloomington<br>Drosophila Stock<br>Center | BDSC:36800;<br>FlyBase:FBst0036800<br>; |
| <i>D. melanogaster</i> . Expresses dsRNA for RNAi of Su(dx) (FBgn0003557) under UAS control in the VALIUM22 vector.: y[1] sc[*] v[1] sev[21]; P{y[+7.7] v[+t1.8]=TRiP.GL01077}attP2          | Bloomington<br>Drosophila Stock<br>Center | BDSC:36836;<br>FlyBase:FBst0036836<br>; |
| <i>D. melanogaster</i> . Expresses dsRNA for RNAi of pbl (FBgn0003041) under UAS control in the VALIUM22 vector.: y[1] sc[*] v[1] sev[21]; P{y[+7.7] v[+t1.8]=TRiP.GL01092}attP2             | Bloomington<br>Drosophila Stock<br>Center | BDSC:36841;<br>FlyBase:FBst0036841<br>; |
| <i>D. melanogaster</i> . Expresses dsRNA for RNAi of Sod2 (FBgn0010213) under UAS control in the VALIUM22 vector.: y[1] sc[*] v[1] sev[21]; P{y[+7.7] v[+t1.8]=TRiP.GL01015}attP40           | Bloomington<br>Drosophila Stock<br>Center | BDSC:36871;<br>FlyBase:FBst0036871<br>; |
| <i>D. melanogaster</i> . Expresses dsRNA for RNAi of Art1 (FBgn0037834) under UAS control in the VALIUM22 vector.: y[1] sc[*] v[1] sev[21]; P{y[+7.7] v[+t1.8]=TRiP.GL01072}attP2/TM3, Sb[1] | Bloomington<br>Drosophila Stock<br>Center | BDSC:36891;<br>FlyBase:FBst0036891<br>; |
| <i>D. melanogaster</i> . Expresses dsRNA for RNAi of CG10924 (FBgn0034356) under UAS control in the VALIUM20 vector.: y[1] sc[*] v[1] sev[21]; P{y[+7.7] v[+t1.8]=TRiP.HMS00200}attP2        | Bloomington<br>Drosophila Stock<br>Center | BDSC:36915;<br>FlyBase:FBst0036915<br>; |
| <i>D. melanogaster</i> . Expresses dsRNA for RNAi of trr (FBgn0023518) under UAS control in the VALIUM20 vector.: y[1] sc[*] v[1] sev[21]; P{y[+7.7] v[+t1.8]=TRiP.HMS01019}attP2            | Bloomington<br>Drosophila Stock<br>Center | BDSC:36916;<br>FlyBase:FBst0036916<br>; |



|                                                                                                                                                                                       |                                           |                                         |
|---------------------------------------------------------------------------------------------------------------------------------------------------------------------------------------|-------------------------------------------|-----------------------------------------|
| <i>D. melanogaster</i> . Expresses dsRNA for RNAi of Cdc42 (FBgn0010341) under UAS control in the VALIUM22 vector.: y[1] sc[*] v[1] sev[21]; P{y[+t7.7] v[+t1.8]=TRiP.GL00620}attP40  | Bloomington<br>Drosophila Stock<br>Center | BDSC:37477;<br>FlyBase:FBst0037477<br>; |
| <i>D. melanogaster</i> . Expresses dsRNA for RNAi of nej (FBgn0261617) under UAS control in the VALIUM20 vector.: y[1] sc[*] v[1] sev[21]; P{y[+t7.7] v[+t1.8]=TRiP.HMS01507}attP2    | Bloomington<br>Drosophila Stock<br>Center | BDSC:37489;<br>FlyBase:FBst0037489<br>; |
| <i>D. melanogaster</i> . Expresses dsRNA for RNAi of Pvr (FBgn0032006) under UAS control in the VALIUM20 vector.: y[1] sc[*] v[1] sev[21]; P{y[+t7.7] v[+t1.8]=TRiP.HMS01662}attP40   | Bloomington<br>Drosophila Stock<br>Center | BDSC:37520;<br>FlyBase:FBst0037520<br>; |
| <i>D. melanogaster</i> . Expresses dsRNA for RNAi of cno (FBgn0259212) under UAS control in the VALIUM22 vector.: y[1] sc[*] v[1] sev[21]; P{y[+t7.7] v[+t1.8]=TRiP.GL00633}attP40    | Bloomington<br>Drosophila Stock<br>Center | BDSC:38194;<br>FlyBase:FBst0038194<br>; |
| <i>D. melanogaster</i> . Expresses dsRNA for RNAi of pygo (FBgn0043900) under UAS control in the VALIUM22 vector.: y[1] sc[*] v[1] sev[21]; P{y[+t7.7] v[+t1.8]=TRiP.GL00647}attP40   | Bloomington<br>Drosophila Stock<br>Center | BDSC:38208;<br>FlyBase:FBst0038208<br>; |
| <i>D. melanogaster</i> . Expresses dsRNA for RNAi of ed (FBgn0000547) under UAS control in the VALIUM22 vector.: y[1] sc[*] v[1] sev[21]; P{y[+t7.7] v[+t1.8]=TRiP.GL00648}attP40     | Bloomington<br>Drosophila Stock<br>Center | BDSC:38209;<br>FlyBase:FBst0038209<br>; |
| <i>D. melanogaster</i> . Expresses dsRNA for RNAi of Nrg (FBgn0264975) under UAS control in the VALIUM22 vector.: y[1] sc[*] v[1] sev[21]; P{y[+t7.7] v[+t1.8]=TRiP.GL00656}attP40    | Bloomington<br>Drosophila Stock<br>Center | BDSC:38215;<br>FlyBase:FBst0038215<br>; |
| <i>D. melanogaster</i> . Expresses dsRNA for RNAi of aph-1 (FBgn0031458) under UAS control in the VALIUM20 vector.: y[1] sc[*] v[1] sev[21]; P{y[+t7.7] v[+t1.8]=TRiP.HMS01693}attP40 | Bloomington<br>Drosophila Stock<br>Center | BDSC:38249;<br>FlyBase:FBst0038249<br>; |
| <i>D. melanogaster</i> . Expresses dsRNA for RNAi of cbt (FBgn0043364) under UAS control in the VALIUM20 vector.: y[1] sc[*] v[1] sev[21]; P{y[+t7.7] v[+t1.8]=TRiP.HMS01726}attP40   | Bloomington<br>Drosophila Stock<br>Center | BDSC:38276;<br>FlyBase:FBst0038276<br>; |
| <i>D. melanogaster</i> . Expresses dsRNA for RNAi of Vps36 (FBgn0086785) under UAS control in the VALIUM20 vector.: y[1] sc[*] v[1] sev[21]; P{y[+t7.7] v[+t1.8]=TRiP.HMS01739}attP40 | Bloomington<br>Drosophila Stock<br>Center | BDSC:38286;<br>FlyBase:FBst0038286<br>; |
| <i>D. melanogaster</i> . Expresses dsRNA for RNAi of crb (FBgn0259685) under UAS control in the VALIUM20 vector.: y[1] v[1]; P{y[+t7.7] v[+t1.8]=TRiP.HMS01842}attP40                 | Bloomington<br>Drosophila Stock<br>Center | BDSC:38373;<br>FlyBase:FBst0038373<br>; |

|                                                                                                                                                                                           |                                           |                                         |
|-------------------------------------------------------------------------------------------------------------------------------------------------------------------------------------------|-------------------------------------------|-----------------------------------------|
| <i>D. melanogaster</i> . Expresses dsRNA for RNAi of tws (FBgn0004889) under UAS control in the VALIUM22 vector.: y[1] v[1]; P{y[+t7.7] v[+t1.8]=TRiP.GL00670}attP40/CyO                  | Bloomington<br>Drosophila Stock<br>Center | BDSC:38899;<br>FlyBase:FBst0038899<br>; |
| <i>D. melanogaster</i> . Expresses dsRNA for RNAi of S (FBgn0003310) under UAS control in the VALIUM22 vector.: y[1] sc[*] v[1] sev[21]; P{y[+t7.7] v[+t1.8]=TRiP.GL00686}attP2           | Bloomington<br>Drosophila Stock<br>Center | BDSC:38914;<br>FlyBase:FBst0038914<br>; |
| <i>D. melanogaster</i> . Expresses dsRNA for RNAi of Pvf3 (FBgn0085407) under UAS control in the VALIUM20 vector.: y[1] v[1]; P{y[+t7.7] v[+t1.8]=TRiP.HMS01876}attP40/CyO                | Bloomington<br>Drosophila Stock<br>Center | BDSC:38962;<br>FlyBase:FBst0038962<br>; |
| <i>D. melanogaster</i> . Expresses dsRNA for RNAi of CanB2 (FBgn0015614) under UAS control in the VALIUM20 vector.: y[1] sc[*] v[1] sev[21]; P{y[+t7.7] v[+t1.8]=TRiP.HMS01886}attP2      | Bloomington<br>Drosophila Stock<br>Center | BDSC:38971;<br>FlyBase:FBst0038971<br>; |
| <i>D. melanogaster</i> . Expresses dsRNA for RNAi of Pi3K21B (FBgn0020622) under UAS control in the VALIUM20 vector.: y[1] sc[*] v[1] sev[21]; P{y[+t7.7] v[+t1.8]=TRiP.HMS01907}attP40   | Bloomington<br>Drosophila Stock<br>Center | BDSC:38991;<br>FlyBase:FBst0038991<br>; |
| <i>D. melanogaster</i> . Expresses dsRNA for RNAi of par-6 (FBgn0026192) under UAS control in the VALIUM20 vector.: y[1] sc[*] v[1] sev[21]; P{y[+t7.7] v[+t1.8]=TRiP.HMS01928}attP40     | Bloomington<br>Drosophila Stock<br>Center | BDSC:39010;<br>FlyBase:FBst0039010<br>; |
| <i>D. melanogaster</i> . Expresses dsRNA for RNAi of Pvf1 (FBgn0030964) under UAS control in the VALIUM20 vector.: y[1] sc[*] v[1] sev[21]; P{y[+t7.7] v[+t1.8]=TRiP.HMS01958}attP40      | Bloomington<br>Drosophila Stock<br>Center | BDSC:39038;<br>FlyBase:FBst0039038<br>; |
| <i>D. melanogaster</i> . Expresses dsRNA for RNAi of Pka-C3 (FBgn0000489) under UAS control in the VALIUM20 vector.: y[1] sc[*] v[1] sev[21]; P{y[+t7.7] v[+t1.8]=TRiP.HMS01970}attP2     | Bloomington<br>Drosophila Stock<br>Center | BDSC:39050;<br>FlyBase:FBst0039050<br>; |
| <i>D. melanogaster</i> . Expresses dsRNA for RNAi of DAAM (FBgn0025641) under UAS control in the VALIUM20 vector.: y[1] sc[*] v[1] sev[21]; P{y[+t7.7] v[+t1.8]=TRiP.HMS01978}attP2       | Bloomington<br>Drosophila Stock<br>Center | BDSC:39058;<br>FlyBase:FBst0039058<br>; |
| <i>D. melanogaster</i> . Expresses dsRNA for RNAi of scrib (FBgn0263289) under UAS control in the VALIUM20 vector.: y[1] sc[*] v[1] sev[21]; P{y[+t7.7] v[+t1.8]=TRiP.HMS01993}attP40/CyO | Bloomington<br>Drosophila Stock<br>Center | BDSC:39073;<br>FlyBase:FBst0039073<br>; |
| <i>D. melanogaster</i> . Expresses dsRNA for RNAi of sina (FBgn0003410) under UAS control in the VALIUM20 vector.: y[1] v[1]; P{y[+t7.7] v[+t1.8]=TRiP.HMS02008}attP40                    | Bloomington<br>Drosophila Stock<br>Center | BDSC:40842;<br>FlyBase:FBst0040842<br>; |

|                                                                                                                                                                                                |                                           |                                         |
|------------------------------------------------------------------------------------------------------------------------------------------------------------------------------------------------|-------------------------------------------|-----------------------------------------|
| <i>D. melanogaster</i> . Expresses dsRNA for RNAi of btl (FBgn0285896) under UAS control in the VALIUM20 vector.: y[1] sc[*] v[1] sev[21]; P{y[+t7.7] v[+t1.8]=TRiP.HMS02038}attP2             | Bloomington<br>Drosophila Stock<br>Center | BDSC:40871;<br>FlyBase:FBst0040871<br>; |
| <i>D. melanogaster</i> . Expresses dsRNA for RNAi of Pp2B-14D (FBgn0011826) under UAS control in the VALIUM20 vector.: y[1] sc[*] v[1] sev[21]; P{y[+t7.7] v[+t1.8]=TRiP.HMS02039}attP2        | Bloomington<br>Drosophila Stock<br>Center | BDSC:40872;<br>FlyBase:FBst0040872<br>; |
| <i>D. melanogaster</i> . Expresses dsRNA for RNAi of Smurf (FBgn0029006) under UAS control in the VALIUM20 vector.: y[1] sc[*] v[1] sev[21]; P{y[+t7.7] v[+t1.8]=TRiP.HMS02153}attP40          | Bloomington<br>Drosophila Stock<br>Center | BDSC:40905;<br>FlyBase:FBst0040905<br>; |
| <i>D. melanogaster</i> . Expresses dsRNA for RNAi of CycB (FBgn0000405) under UAS control in the VALIUM20 vector.: y[1] sc[*] v[1] sev[21]; P{y[+t7.7] v[+t1.8]=TRiP.HMS02163}attP2/TM3, Sb[1] | Bloomington<br>Drosophila Stock<br>Center | BDSC:40915;<br>FlyBase:FBst0040915<br>; |
| <i>D. melanogaster</i> . Expresses dsRNA for RNAi of fu (FBgn0001079) under UAS control in the VALIUM22 vector.: y[1] v[1]; P{y[+t7.7] v[+t1.8]=TRiP.GL00705}attP40                            | Bloomington<br>Drosophila Stock<br>Center | BDSC:41588;<br>FlyBase:FBst0041588<br>; |
| <i>D. melanogaster</i> . Expresses dsRNA for RNAi of ru (FBgn0003295) under UAS control in the VALIUM22 vector.: y[1] sc[*] v[1] sev[21]; P{y[+t7.7] v[+t1.8]=TRiP.GL01129}attP2               | Bloomington<br>Drosophila Stock<br>Center | BDSC:41593;<br>FlyBase:FBst0041593<br>; |
| <i>D. melanogaster</i> . Expresses dsRNA for RNAi of ksr (FBgn0015402) under UAS control in the VALIUM22 vector.: y[1] v[1]; P{y[+t7.7] v[+t1.8]=TRiP.GL01134}attP2                            | Bloomington<br>Drosophila Stock<br>Center | BDSC:41598;<br>FlyBase:FBst0041598<br>; |
| <i>D. melanogaster</i> . Expresses dsRNA for RNAi of slpr (FBgn0030018) under UAS control in the VALIUM22 vector.: y[1] v[1]; P{y[+t7.7] v[+t1.8]=TRiP.GL01187}attP2                           | Bloomington<br>Drosophila Stock<br>Center | BDSC:41605;<br>FlyBase:FBst0041605<br>; |
| <i>D. melanogaster</i> . Expresses dsRNA for RNAi of p53 (FBgn0039044) under UAS control in the VALIUM22 vector.: y[1] v[1]; P{y[+t7.7] v[+t1.8]=TRiP.GL01220}attP40                           | Bloomington<br>Drosophila Stock<br>Center | BDSC:41638;<br>FlyBase:FBst0041638<br>; |
| <i>D. melanogaster</i> . Expresses dsRNA for RNAi of Smox (FBgn0025800) under UAS control in the VALIUM20 vector.: y[1] sc[*] v[1] sev[21]; P{y[+t7.7] v[+t1.8]=TRiP.HMS02203}attP40           | Bloomington<br>Drosophila Stock<br>Center | BDSC:41670;<br>FlyBase:FBst0041670<br>; |
| <i>D. melanogaster</i> . Expresses dsRNA for RNAi of rho (FBgn0004635) under UAS control in the VALIUM20 vector.: y[1] v[1]; P{y[+t7.7] v[+t1.8]=TRiP.HMS02264}attP40                          | Bloomington<br>Drosophila Stock<br>Center | BDSC:41699;<br>FlyBase:FBst0041699<br>; |

|                                                                                                                                                                                           |                                           |                                         |
|-------------------------------------------------------------------------------------------------------------------------------------------------------------------------------------------|-------------------------------------------|-----------------------------------------|
| <i>D. melanogaster</i> . Expresses dsRNA for RNAi of S6k (FBgn0283472) under UAS control in the VALIUM20 vector.: y[1] v[1]; P{y[+t7.7] v[+t1.8]=TRiP.HMS02267}attP2                      | Bloomington<br>Drosophila Stock<br>Center | BDSC:41702;<br>FlyBase:FBst0041702<br>; |
| <i>D. melanogaster</i> . Expresses dsRNA for RNAi of snk (FBgn0003450) under UAS control in the VALIUM20 vector.: y[1] sc[*] v[1] sev[21]; P{y[+t7.7] v[+t1.8]=TRiP.HMS02289}attP2        | Bloomington<br>Drosophila Stock<br>Center | BDSC:41723;<br>FlyBase:FBst0041723<br>; |
| <i>D. melanogaster</i> . Expresses dsRNA for RNAi of Ufd1-like (FBgn0036136) under UAS control in the VALIUM22 vector.: y[1] v[1]; P{y[+t7.7] v[+t1.8]=TRiP.GL01251}attP2                 | Bloomington<br>Drosophila Stock<br>Center | BDSC:41823;<br>FlyBase:FBst0041823<br>; |
| <i>D. melanogaster</i> . Expresses dsRNA for RNAi of RasGAP1 (FBgn0004390) under UAS control in the VALIUM22 vector.: y[1] v[1]; P{y[+t7.7] v[+t1.8]=TRiP.GL01258}attP2                   | Bloomington<br>Drosophila Stock<br>Center | BDSC:41830;<br>FlyBase:FBst0041830<br>; |
| <i>D. melanogaster</i> . Expresses dsRNA for RNAi of 14-3-3zeta (FBgn0004907) under UAS control in the VALIUM22 vector.: y[1] sc[*] v[1] sev[21]; P{y[+t7.7] v[+t1.8]=TRiP.GL01310}attP40 | Bloomington<br>Drosophila Stock<br>Center | BDSC:41878;<br>FlyBase:FBst0041878<br>; |
| <i>D. melanogaster</i> . Expresses dsRNA for RNAi of tkv (FBgn0003716) under UAS control in the VALIUM22 vector.: y[1] sc[*] v[1] sev[21]; P{y[+t7.7] v[+t1.8]=TRiP.GL01338}attP2         | Bloomington<br>Drosophila Stock<br>Center | BDSC:41904;<br>FlyBase:FBst0041904<br>; |
| <i>D. melanogaster</i> . Expresses dsRNA for RNAi of homer (FBgn0025777) under UAS control in the VALIUM20 vector.: y[1] sc[*] v[1] sev[21]; P{y[+t7.7] v[+t1.8]=TRiP.HMS02301}attP2      | Bloomington<br>Drosophila Stock<br>Center | BDSC:41908;<br>FlyBase:FBst0041908<br>; |
| <i>D. melanogaster</i> . Expresses dsRNA for RNAi of pll (FBgn0010441) under UAS control in the VALIUM20 vector.: y[1] v[1]; P{y[+t7.7] v[+t1.8]=TRiP.HMS02332}attP40                     | Bloomington<br>Drosophila Stock<br>Center | BDSC:41935;<br>FlyBase:FBst0041935<br>; |
| <i>D. melanogaster</i> . Expresses dsRNA for RNAi of eIB (FBgn0004858) under UAS control in the VALIUM20 vector.: y[1] sc[*] v[1] sev[21]; P{y[+t7.7] v[+t1.8]=TRiP.HMS02357}attP2        | Bloomington<br>Drosophila Stock<br>Center | BDSC:41960;<br>FlyBase:FBst0041960<br>; |
| <i>D. melanogaster</i> . Expresses dsRNA for RNAi of ea (FBgn0000533) under UAS control in the VALIUM20 vector.: y[1] sc[*] v[1] sev[21]; P{y[+t7.7] v[+t1.8]=TRiP.HMS02358}attP2         | Bloomington<br>Drosophila Stock<br>Center | BDSC:41961;<br>FlyBase:FBst0041961<br>; |
| <i>D. melanogaster</i> . Expresses dsRNA for RNAi of CycB3 (FBgn0015625) under UAS control in the VALIUM20 vector.: y[1] sc[*] v[1] sev[21]; P{y[+t7.7] v[+t1.8]=TRiP.HMS02377}attP2      | Bloomington<br>Drosophila Stock<br>Center | BDSC:41979;<br>FlyBase:FBst0041979<br>; |

|                                                                                                                                                                                                  |                                           |                                         |
|--------------------------------------------------------------------------------------------------------------------------------------------------------------------------------------------------|-------------------------------------------|-----------------------------------------|
| <i>D. melanogaster</i> . Expresses dsRNA for RNAi of Igs (FBgn0039907) under UAS control in the VALIUM20 vector.: y[1] sc[*] v[1] sev[21]; P{y[+t7.7] v[+t1.8]=TRiP.HMS02381}attP2               | Bloomington<br>Drosophila Stock<br>Center | BDSC:41983;<br>FlyBase:FBst0041983<br>; |
| <i>D. melanogaster</i> . Expresses dsRNA for RNAi of Actbeta (FBgn0024913) under UAS control in the VALIUM20 vector.: y[1] v[1]; P{y[+t7.7] v[+t1.8]=TRiP.HMJ02057}attP40                        | Bloomington<br>Drosophila Stock<br>Center | BDSC:42493;<br>FlyBase:FBst0042493<br>; |
| <i>D. melanogaster</i> . Expresses dsRNA for RNAi of CG5059 (FBgn0037007) under UAS control in the VALIUM20 vector.: y[1] v[1]; P{y[+t7.7] v[+t1.8]=TRiP.HMJ02058}attP40                         | Bloomington<br>Drosophila Stock<br>Center | BDSC:42494;<br>FlyBase:FBst0042494<br>; |
| <i>D. melanogaster</i> . Expresses dsRNA for RNAi of msn (FBgn0010909) under UAS control in the VALIUM20 vector.: y[1] v[1]; P{y[+t7.7] v[+t1.8]=TRiP.HMJ02084}attP40                            | Bloomington<br>Drosophila Stock<br>Center | BDSC:42518;<br>FlyBase:FBst0042518<br>; |
| <i>D. melanogaster</i> . Expresses dsRNA for RNAi of Rassf (FBgn0039055) under UAS control in the VALIUM20 vector.: y[1] v[1]; P{y[+t7.7] v[+t1.8]=TRiP.HMJ02102}attP40                          | Bloomington<br>Drosophila Stock<br>Center | BDSC:42534;<br>FlyBase:FBst0042534<br>; |
| <i>D. melanogaster</i> . Expresses dsRNA for RNAi of sax (FBgn0003317) under UAS control in the VALIUM20 vector.: y[1] v[1]; P{y[+t7.7] v[+t1.8]=TRiP.HMJ02118}attP40/CyO                        | Bloomington<br>Drosophila Stock<br>Center | BDSC:42546;<br>FlyBase:FBst0042546<br>; |
| <i>D. melanogaster</i> . Expresses dsRNA for RNAi of et (FBgn0031055) under UAS control in the VALIUM20 vector.: y[1] v[1]; P{y[+t7.7] v[+t1.8]=TRiP.HMJ02213}attP40                             | Bloomington<br>Drosophila Stock<br>Center | BDSC:42557;<br>FlyBase:FBst0042557<br>; |
| <i>D. melanogaster</i> . Expresses dsRNA for RNAi of nmo (FBgn0011817) under UAS control in the VALIUM20 vector.: y[1] v[1]; P{y[+t7.7] v[+t1.8]=TRiP.HMJ02229}attP40                            | Bloomington<br>Drosophila Stock<br>Center | BDSC:42570;<br>FlyBase:FBst0042570<br>; |
| <i>D. melanogaster</i> . Expresses dsRNA for RNAi of CG12147 (FBgn0037325) under UAS control in the VALIUM20 vector.: y[1] sc[*] v[1] sev[21]; P{y[+t7.7] v[+t1.8]=TRiP.HMS02447}attP2           | Bloomington<br>Drosophila Stock<br>Center | BDSC:42612;<br>FlyBase:FBst0042612<br>; |
| <i>D. melanogaster</i> . Expresses dsRNA for RNAi of Act5C (FBgn0000042) under UAS control in the VALIUM20 vector.: y[1] sc[*] v[1] sev[21]; P{y[+t7.7] v[+t1.8]=TRiP.HMS02487}attP2             | Bloomington<br>Drosophila Stock<br>Center | BDSC:42651;<br>FlyBase:FBst0042651<br>; |
| <i>D. melanogaster</i> . Expresses dsRNA for RNAi of Act87E (FBgn0000046) under UAS control in the VALIUM20 vector.: y[1] sc[*] v[1] sev[21]; P{y[+t7.7] v[+t1.8]=TRiP.HMS02488}attP2/TM3, Sb[1] | Bloomington<br>Drosophila Stock<br>Center | BDSC:42652;<br>FlyBase:FBst0042652<br>; |



|                                                                                                                                                                                                                                                      |                                           |                                         |
|------------------------------------------------------------------------------------------------------------------------------------------------------------------------------------------------------------------------------------------------------|-------------------------------------------|-----------------------------------------|
| <i>D. melanogaster</i> . Expresses dsRNA for RNAi of emc (FBgn0000575) under UAS control in the VALIUM22 vector.: y[1] v[1]; P{y[+7.7] v[+1.8]=TRiP.GL00724}attP2                                                                                    | Bloomington<br>Drosophila Stock<br>Center | BDSC:42768;<br>FlyBase:FBst0042768<br>; |
| <i>D. melanogaster</i> . Expresses dsRNA for RNAi of the Stellate gene family (FBgn0003523) plus Ste12DOR and SteXh:CG42398 (FBgn0044817 and FBgn0259817) under UAS control in the VALIUM22 vector.: y[1] v[1]; P{y[+7.7] v[+1.8]=TRiP.GL01156}attP2 | Bloomington<br>Drosophila Stock<br>Center | BDSC:42786;<br>FlyBase:FBst0042786<br>; |
| <i>D. melanogaster</i> . Expresses dsRNA for RNAi of Socs44A (FBgn0033266) under UAS control in the VALIUM20 vector.: y[1] sc[*] v[1] sev[21]; P{y[+7.7] v[+1.8]=TRiP.HMS02515}attP2                                                                 | Bloomington<br>Drosophila Stock<br>Center | BDSC:42830;<br>FlyBase:FBst0042830<br>; |
| <i>D. melanogaster</i> . Expresses dsRNA for RNAi of gcm (FBgn0014179) under UAS control in the VALIUM20 vector.: y[1] sc[*] v[1] sev[21]; P{y[+7.7] v[+1.8]=TRiP.HMS02582}attP40                                                                    | Bloomington<br>Drosophila Stock<br>Center | BDSC:42889;<br>FlyBase:FBst0042889<br>; |
| <i>D. melanogaster</i> . Expresses dsRNA for RNAi of CkIibeta (FBgn0000259) under UAS control in the VALIUM20 vector.: y[1] sc[*] v[1] sev[21]; P{y[+7.7] v[+1.8]=TRiP.HMS02636}attP40                                                               | Bloomington<br>Drosophila Stock<br>Center | BDSC:42943;<br>FlyBase:FBst0042943<br>; |
| <i>D. melanogaster</i> . Expresses dsRNA for RNAi of smo (FBgn0003444) under UAS control in the VALIUM22 vector.: y[1] v[1]; P{y[+7.7] v[+1.8]=TRiP.GL01472}attP2                                                                                    | Bloomington<br>Drosophila Stock<br>Center | BDSC:43134;<br>FlyBase:FBst0043134<br>; |
| <i>D. melanogaster</i> . Expresses dsRNA for RNAi of dock (FBgn0010583) under UAS control in the VALIUM22 vector.: y[1] v[1]; P{y[+7.7] v[+1.8]=TRiP.GL01519}attP2/TM3, Sb[1]                                                                        | Bloomington<br>Drosophila Stock<br>Center | BDSC:43176;<br>FlyBase:FBst0043176<br>; |
| <i>D. melanogaster</i> . Expresses dsRNA for RNAi of Mad (FBgn0011648) under UAS control in the VALIUM22 vector.: y[1] sc[*] v[1] sev[21]; P{y[+7.7] v[+1.8]=TRiP.GL01527}attP40                                                                     | Bloomington<br>Drosophila Stock<br>Center | BDSC:43183;<br>FlyBase:FBst0043183<br>; |
| <i>D. melanogaster</i> . Expresses dsRNA for RNAi of Pp2A-29B (FBgn0260439) under UAS control in the VALIUM20 vector.: y[1] sc[*] v[1] sev[21]; P{y[+7.7] v[+1.8]=TRiP.HMS01921}attP2/TM3, Sb[1]                                                     | Bloomington<br>Drosophila Stock<br>Center | BDSC:43283;<br>FlyBase:FBst0043283<br>; |
| <i>D. melanogaster</i> . Expresses dsRNA for RNAi of CG11658 (FBgn0036196) under UAS control in the VALIUM20 vector.: y[1] sc[*] v[1] sev[21]; P{y[+7.7] v[+1.8]=TRiP.HMS02671}attP40                                                                | Bloomington<br>Drosophila Stock<br>Center | BDSC:43298;<br>FlyBase:FBst0043298<br>; |



|                                                                                                                                                                                        |                                           |                                         |
|----------------------------------------------------------------------------------------------------------------------------------------------------------------------------------------|-------------------------------------------|-----------------------------------------|
| <i>D. melanogaster</i> . Expresses dsRNA for RNAi of Myc (FBgn0262656) under UAS control in the VALIUM22 vector.: y[1] sc[*] v[1] sev[21]; P{y[+7.7] v[+t1.8]=TRiP.GL01314}attP40      | Bloomington<br>Drosophila Stock<br>Center | BDSC:43962;<br>FlyBase:FBst0043962<br>; |
| <i>D. melanogaster</i> . Expresses dsRNA for RNAi of pav (FBgn0011692) under UAS control in the VALIUM22 vector.: y[1] sc[*] v[1] sev[21]; P{y[+7.7] v[+t1.8]=TRiP.GL01316}attP40      | Bloomington<br>Drosophila Stock<br>Center | BDSC:43963;<br>FlyBase:FBst0043963<br>; |
| <i>D. melanogaster</i> . Expresses dsRNA for RNAi of eIF4EHP (FBgn0053100) under UAS control in the VALIUM20 vector.: y[1] sc[*] v[1] sev[21]; P{y[+7.7] v[+t1.8]=TRiP.HMS02703}attP40 | Bloomington<br>Drosophila Stock<br>Center | BDSC:43990;<br>FlyBase:FBst0043990<br>; |
| <i>D. melanogaster</i> . Expresses dsRNA for RNAi of Atg1 (FBgn0260945) under UAS control in the VALIUM20 vector.: y[1] v[1]; P{y[+7.7] v[+t1.8]=TRiP.HMS02750}attP40                  | Bloomington<br>Drosophila Stock<br>Center | BDSC:44034;<br>FlyBase:FBst0044034<br>; |
| <i>D. melanogaster</i> . Expresses dsRNA for RNAi of tefu (FBgn0045035) under UAS control in the VALIUM20 vector.: y[1] sc[*] v[1] sev[21]; P{y[+7.7] v[+t1.8]=TRiP.HMS02790}attP40    | Bloomington<br>Drosophila Stock<br>Center | BDSC:44073;<br>FlyBase:FBst0044073<br>; |
| <i>D. melanogaster</i> . Expresses dsRNA for RNAi of bi (FBgn0000179) under UAS control in the VALIUM20 vector.: y[1] sc[*] v[1] sev[21]; P{y[+7.7] v[+t1.8]=TRiP.HMS02815}attP2       | Bloomington<br>Drosophila Stock<br>Center | BDSC:44095;<br>FlyBase:FBst0044095<br>; |
| <i>D. melanogaster</i> . Expresses dsRNA for RNAi of mad2 (FBgn0035640) under UAS control in the VALIUM22 vector.: y[1] sc[*] v[1] sev[21]; P{y[+7.7] v[+t1.8]=TRiP.GLC01381}attP2     | Bloomington<br>Drosophila Stock<br>Center | BDSC:44430;<br>FlyBase:FBst0044430<br>; |
| <i>D. melanogaster</i> . Expresses dsRNA for RNAi of ebi (FBgn0263933) under UAS control in the VALIUM22 vector.: y[1] v[1]; P{y[+7.7] v[+t1.8]=TRiP.GLC01413}attP40                   | Bloomington<br>Drosophila Stock<br>Center | BDSC:44443;<br>FlyBase:FBst0044443<br>; |
| <i>D. melanogaster</i> . Expresses dsRNA for RNAi of dx (FBgn0000524) under UAS control in the VALIUM22 vector.: y[1] sc[*] v[1] sev[21]; P{y[+7.7] v[+t1.8]=TRiP.GLC01607}attP2       | Bloomington<br>Drosophila Stock<br>Center | BDSC:44455;<br>FlyBase:FBst0044455<br>; |
| <i>D. melanogaster</i> . Expresses dsRNA for RNAi of fz3 (FBgn0027343) under UAS control in the VALIUM22 vector.: y[1] sc[*] v[1] sev[21]; P{y[+7.7] v[+t1.8]=TRiP.GLC01626}attP2      | Bloomington<br>Drosophila Stock<br>Center | BDSC:44468;<br>FlyBase:FBst0044468<br>; |
| <i>D. melanogaster</i> . Expresses dsRNA for RNAi of cos (FBgn0000352) under UAS control in the VALIUM20 vector.: y[1] v[1]; P{y[+7.7] v[+t1.8]=TRiP.HMC02347}attP2                    | Bloomington<br>Drosophila Stock<br>Center | BDSC:44472;<br>FlyBase:FBst0044472<br>; |

|                                                                                                                                                                                               |                                           |                                         |
|-----------------------------------------------------------------------------------------------------------------------------------------------------------------------------------------------|-------------------------------------------|-----------------------------------------|
| <i>D. melanogaster</i> . Expresses dsRNA for RNAi of disp (FBgn0029088) under UAS control in the VALIUM20 vector.: y[1] sc[*] v[1] sev[21]; P{y[+7.7] v[+t1.8]=TRiP.HMS02877}attP2/TM3, Sb[1] | Bloomington<br>Drosophila Stock<br>Center | BDSC:44633;<br>FlyBase:FBst0044633<br>; |
| <i>D. melanogaster</i> . Expresses dsRNA for RNAi of spen (FBgn0016977) under UAS control in the VALIUM22 vector.: y[1] v[1]; P{y[+7.7] v[+t1.8]=TRiP.GLC01647}attP40                         | Bloomington<br>Drosophila Stock<br>Center | BDSC:50529;<br>FlyBase:FBst0050529<br>; |
| <i>D. melanogaster</i> . Expresses dsRNA for RNAi of dlp (FBgn0041604) under UAS control in the VALIUM22 vector.: y[1] v[1]; P{y[+7.7] v[+t1.8]=TRiP.GLC01658}attP40                          | Bloomington<br>Drosophila Stock<br>Center | BDSC:50540;<br>FlyBase:FBst0050540<br>; |
| <i>D. melanogaster</i> . Expresses dsRNA for RNAi of wgn (FBgn0030941) under UAS control in the VALIUM22 vector.: y[1] sc[*] v[1] sev[21]; P{y[+7.7] v[+t1.8]=TRiP.GLC01716}attP2             | Bloomington<br>Drosophila Stock<br>Center | BDSC:50594;<br>FlyBase:FBst0050594<br>; |
| <i>D. melanogaster</i> . Expresses dsRNA for RNAi of RpL8 (FBgn0261602) under UAS control in the VALIUM20 vector.: y[1] v[1]; P{y[+7.7] v[+t1.8]=TRiP.HMC02977}attP2/TM3, Sb[1]               | Bloomington<br>Drosophila Stock<br>Center | BDSC:50610;<br>FlyBase:FBst0050610<br>; |
| <i>D. melanogaster</i> . Expresses dsRNA for RNAi of Act42A (FBgn0000043) under UAS control in the VALIUM20 vector.: y[1] v[1]; P{y[+7.7] v[+t1.8]=TRiP.HMC02992}attP2/TM3, Sb[1]             | Bloomington<br>Drosophila Stock<br>Center | BDSC:50625;<br>FlyBase:FBst0050625<br>; |
| <i>D. melanogaster</i> . Expresses dsRNA for RNAi of tin (FBgn0004110) under UAS control in the VALIUM20 vector.: y[1] v[1]; P{y[+7.7] v[+t1.8]=TRiP.HMC03064}attP2                           | Bloomington<br>Drosophila Stock<br>Center | BDSC:50663;<br>FlyBase:FBst0050663<br>; |
| <i>D. melanogaster</i> . Expresses dsRNA for RNAi of EcR (FBgn0000546) under UAS control in the VALIUM20 vector.: y[1] v[1]; P{y[+7.7] v[+t1.8]=TRiP.HMC03114}attP2/TM3, Sb[1]                | Bloomington<br>Drosophila Stock<br>Center | BDSC:50712;<br>FlyBase:FBst0050712<br>; |
| <i>D. melanogaster</i> . Expresses dsRNA for RNAi of aru (FBgn0029095) under UAS control in the VALIUM20 vector.: y[1] sc[*] v[1] sev[21]; P{y[+7.7] v[+t1.8]=TRiP.HMS02966}attP2             | Bloomington<br>Drosophila Stock<br>Center | BDSC:50730;<br>FlyBase:FBst0050730<br>; |
| <i>D. melanogaster</i> . Expresses dsRNA for RNAi of eIF4E4 (FBgn0035709) under UAS control in the VALIUM20 vector.: y[1] v[1]; P{y[+7.7] v[+t1.8]=TRiP.HMJ21052}attP40                       | Bloomington<br>Drosophila Stock<br>Center | BDSC:50951;<br>FlyBase:FBst0050951<br>; |
| <i>D. melanogaster</i> . Expresses dsRNA for RNAi of pont (FBgn0040078) under UAS control in the VALIUM20 vector.: y[1] v[1]; P{y[+7.7] v[+t1.8]=TRiP.HMJ21078}attP40                         | Bloomington<br>Drosophila Stock<br>Center | BDSC:50972;<br>FlyBase:FBst0050972<br>; |

|                                                                                                                                                                                                      |                                           |                                         |
|------------------------------------------------------------------------------------------------------------------------------------------------------------------------------------------------------|-------------------------------------------|-----------------------------------------|
| <i>D. melanogaster</i> . Expresses dsRNA for RNAi of <i>dpn</i> (FBgn0010109) under UAS control in the VALIUM20 vector.: y[1] v[1]; P{y[+7.7] v[+1.8]=TRiP.HMC03154}attP2                            | Bloomington<br>Drosophila Stock<br>Center | BDSC:51440;<br>FlyBase:FBst0051440<br>; |
| <i>D. melanogaster</i> . Expresses dsRNA for RNAi of <i>Spn27A</i> (FBgn0028990) under UAS control in the VALIUM20 vector.: y[1] sc[*] v[1] sev[21]; P{y[+7.7] v[+1.8]=TRiP.HMC03159}attP2           | Bloomington<br>Drosophila Stock<br>Center | BDSC:51445;<br>FlyBase:FBst0051445<br>; |
| <i>D. melanogaster</i> . Expresses dsRNA for RNAi of <i>ttv</i> (FBgn0265974) under UAS control in the VALIUM20 vector.: y[1] v[1]; P{y[+7.7] v[+1.8]=TRiP.HMC03225}attP40                           | Bloomington<br>Drosophila Stock<br>Center | BDSC:51480;<br>FlyBase:FBst0051480<br>; |
| <i>D. melanogaster</i> . Expresses dsRNA for RNAi of <i>Mipp2</i> (FBgn0026060) under UAS control in the VALIUM20 vector.: y[1] v[1]; P{y[+7.7] v[+1.8]=TRiP.HMC03229}attP40/CyO                     | Bloomington<br>Drosophila Stock<br>Center | BDSC:51482;<br>FlyBase:FBst0051482<br>; |
| <i>D. melanogaster</i> . Expresses dsRNA for RNAi of <i>kibra</i> (FBgn0262127) under UAS control in the VALIUM20 vector.: y[1] sc[*] v[1] sev[21]; P{y[+7.7] v[+1.8]=TRiP.HMC03256}attP2            | Bloomington<br>Drosophila Stock<br>Center | BDSC:51499;<br>FlyBase:FBst0051499<br>; |
| <i>D. melanogaster</i> . Expresses dsRNA for RNAi of <i>tld</i> (FBgn0003719) under UAS control in the VALIUM20 vector.: y[1] sc[*] v[1] sev[21]; P{y[+7.7] v[+1.8]=TRiP.HMC03275}attP2              | Bloomington<br>Drosophila Stock<br>Center | BDSC:51507;<br>FlyBase:FBst0051507<br>; |
| <i>D. melanogaster</i> . Expresses dsRNA for RNAi of <i>S6kII</i> (FBgn0262866) under UAS control in the VALIUM20 vector.: y[1] sc[*] v[1] sev[21]; P{y[+7.7] v[+1.8]=TRiP.HMC03140}attP40           | Bloomington<br>Drosophila Stock<br>Center | BDSC:51694;<br>FlyBase:FBst0051694<br>; |
| <i>D. melanogaster</i> . Expresses dsRNA for RNAi of <i>ast</i> (FBgn0015905) under UAS control in the VALIUM20 vector.: y[1] v[1]; P{y[+7.7] v[+1.8]=TRiP.HMC03173}attP2                            | Bloomington<br>Drosophila Stock<br>Center | BDSC:51700;<br>FlyBase:FBst0051700<br>; |
| <i>D. melanogaster</i> . Expresses dsRNA for RNAi of <i>ras</i> (FBgn0003204) under UAS control in the VALIUM20 vector.: y[1] sc[*] v[1] sev[21]; P{y[+7.7] v[+1.8]=TRiP.HMC03250}attP2              | Bloomington<br>Drosophila Stock<br>Center | BDSC:51717;<br>FlyBase:FBst0051717<br>; |
| <i>D. melanogaster</i> . Expresses dsRNA for RNAi of <i>E(spl)mgamma-HLH</i> (FBgn0002735) under UAS control in the VALIUM20 vector.: y[1] sc[*] v[1] sev[21]; P{y[+7.7] v[+1.8]=TRiP.HMC03315}attP2 | Bloomington<br>Drosophila Stock<br>Center | BDSC:51762;<br>FlyBase:FBst0051762<br>; |
| <i>D. melanogaster</i> . Expresses dsRNA for RNAi of <i>Src64B</i> (FBgn0262733) under UAS control in the VALIUM20 vector.: y[1] v[1]; P{y[+7.7] v[+1.8]=TRiP.HMC03327}attP40                        | Bloomington<br>Drosophila Stock<br>Center | BDSC:51772;<br>FlyBase:FBst0051772<br>; |

|                                                                                                                                                                                           |                                           |                                         |
|-------------------------------------------------------------------------------------------------------------------------------------------------------------------------------------------|-------------------------------------------|-----------------------------------------|
| <i>D. melanogaster</i> . Expresses dsRNA for RNAi of brk (FBgn0024250) under UAS control in the VALIUM20 vector.: y[1] sc[*] v[1] sev[21]; P{y[+t7.7] v[+t1.8]=TRiP.HMC03345}attP2        | Bloomington<br>Drosophila Stock<br>Center | BDSC:51789;<br>FlyBase:FBst0051789<br>; |
| <i>D. melanogaster</i> . Expresses dsRNA for RNAi of Ext2 (FBgn0029175) under UAS control in the VALIUM20 vector.: y[1] sc[*] v[1] sev[21]; P{y[+t7.7] v[+t1.8]=TRiP.HMC03621}attP40      | Bloomington<br>Drosophila Stock<br>Center | BDSC:52883;<br>FlyBase:FBst0052883<br>; |
| <i>D. melanogaster</i> . Expresses dsRNA for RNAi of pen-2 (FBgn0053198) under UAS control in the VALIUM20 vector.: y[1] sc[*] v[1] sev[21]; P{y[+t7.7] v[+t1.8]=TRiP.HMC03648}attP40/CyO | Bloomington<br>Drosophila Stock<br>Center | BDSC:52908;<br>FlyBase:FBst0052908<br>; |
| <i>D. melanogaster</i> . Expresses dsRNA for RNAi of Tsc1 (FBgn0026317) under UAS control in the VALIUM20 vector.: y[1] sc[*] v[1] sev[21]; P{y[+t7.7] v[+t1.8]=TRiP.HMC03672}attP40      | Bloomington<br>Drosophila Stock<br>Center | BDSC:52931;<br>FlyBase:FBst0052931<br>; |
| <i>D. melanogaster</i> . Expresses dsRNA for RNAi of NT1 (FBgn0261526) under UAS control in the VALIUM20 vector.: y[1] v[1]; P{y[+t7.7] v[+t1.8]=TRiP.HMJ21720}attP40                     | Bloomington<br>Drosophila Stock<br>Center | BDSC:53003;<br>FlyBase:FBst0053003<br>; |
| <i>D. melanogaster</i> . Expresses dsRNA for RNAi of arr (FBgn0000119) under UAS control in the VALIUM20 vector.: y[1] v[1]; P{y[+t7.7] v[+t1.8]=TRiP.HMC03571}attP40                     | Bloomington<br>Drosophila Stock<br>Center | BDSC:53342;<br>FlyBase:FBst0053342<br>; |
| <i>D. melanogaster</i> . Expresses dsRNA for RNAi of kermit (FBgn0010504) under UAS control in the VALIUM20 vector.: y[1] sc[*] v[1] sev[21]; P{y[+t7.7] v[+t1.8]=TRiP.HMC03578}attP40    | Bloomington<br>Drosophila Stock<br>Center | BDSC:53349;<br>FlyBase:FBst0053349<br>; |
| <i>D. melanogaster</i> . Expresses dsRNA for RNAi of Sirt1 (FBgn0024291) under UAS control in the VALIUM20 vector.: y[1] v[1]; P{y[+t7.7] v[+t1.8]=TRiP.HMJ21708}attP40                   | Bloomington<br>Drosophila Stock<br>Center | BDSC:53697;<br>FlyBase:FBst0053697<br>; |
| <i>D. melanogaster</i> . Expresses dsRNA for RNAi of tow (FBgn0035719) under UAS control in the VALIUM20 vector.: y[1] v[1]; P{y[+t7.7] v[+t1.8]=TRiP.HMJ21747}attP40                     | Bloomington<br>Drosophila Stock<br>Center | BDSC:53704;<br>FlyBase:FBst0053704<br>; |
| <i>D. melanogaster</i> . Expresses dsRNA for RNAi of eIF4E3 (FBgn0265089) under UAS control in the VALIUM20 vector.: y[1] v[1]; P{y[+t7.7] v[+t1.8]=TRiP.HMJ21195}attP40                  | Bloomington<br>Drosophila Stock<br>Center | BDSC:53880;<br>FlyBase:FBst0053880<br>; |
| <i>D. melanogaster</i> . Expresses dsRNA for RNAi of hppy (FBgn0263395) under UAS control in the VALIUM20 vector.: y[1] v[1]; P{y[+t7.7] v[+t1.8]=TRiP.HMJ21199}attP40                    | Bloomington<br>Drosophila Stock<br>Center | BDSC:53884;<br>FlyBase:FBst0053884<br>; |

|                                                                                                                                                                                       |                                           |                                         |
|---------------------------------------------------------------------------------------------------------------------------------------------------------------------------------------|-------------------------------------------|-----------------------------------------|
| <i>D. melanogaster</i> . Expresses dsRNA for RNAi of dome (FBgn0043903) under UAS control in the VALIUM20 vector.: y[1] v[1]; P{y[+t7.7] v[+t1.8]=TRiP.HMJ21208}attP40                | Bloomington<br>Drosophila Stock<br>Center | BDSC:53890;<br>FlyBase:FBst0053890<br>; |
| <i>D. melanogaster</i> . Expresses dsRNA for RNAi of Ocho (FBgn0040296) under UAS control in the VALIUM20 vector.: y[1] v[1]; P{y[+t7.7] v[+t1.8]=TRiP.HMJ21588}attP40/CyO            | Bloomington<br>Drosophila Stock<br>Center | BDSC:54851;<br>FlyBase:FBst0054851<br>; |
| <i>D. melanogaster</i> . Expresses dsRNA for RNAi of sqd (FBgn0263396) under UAS control in the VALIUM20 vector.: y[1] sc[*] v[1] sev[21]; P{y[+t7.7] v[+t1.8]=TRiP.HMC03848}attP40   | Bloomington<br>Drosophila Stock<br>Center | BDSC:55169;<br>FlyBase:FBst0055169<br>; |
| <i>D. melanogaster</i> . Expresses dsRNA for RNAi of mago (FBgn0002736) under UAS control in the VALIUM20 vector.: y[1] sc[*] v[1] sev[21]; P{y[+t7.7] v[+t1.8]=TRiP.HMC03947}attP40  | Bloomington<br>Drosophila Stock<br>Center | BDSC:55260;<br>FlyBase:FBst0055260<br>; |
| <i>D. melanogaster</i> . Expresses dsRNA for RNAi of egr (FBgn0033483) under UAS control in the VALIUM20 vector.: y[1] sc[*] v[1] sev[21]; P{y[+t7.7] v[+t1.8]=TRiP.HMC03963}attP40   | Bloomington<br>Drosophila Stock<br>Center | BDSC:55276;<br>FlyBase:FBst0055276<br>; |
| <i>D. melanogaster</i> . Expresses dsRNA for RNAi of E(spl)m3-HLH (FBgn0002609) under UAS control in the VALIUM20 vector.: y[1] v[1]; P{y[+t7.7] v[+t1.8]=TRiP.HMC03989}attP2         | Bloomington<br>Drosophila Stock<br>Center | BDSC:55302;<br>FlyBase:FBst0055302<br>; |
| <i>D. melanogaster</i> . Expresses dsRNA for RNAi of Coprox (FBgn0021944) under UAS control in the VALIUM20 vector.: y[1] v[1]; P{y[+t7.7] v[+t1.8]=TRiP.HMC04005}attP40/CyO          | Bloomington<br>Drosophila Stock<br>Center | BDSC:55318;<br>FlyBase:FBst0055318<br>; |
| <i>D. melanogaster</i> . Expresses dsRNA for RNAi of Rab23 (FBgn0037364) under UAS control in the VALIUM20 vector.: y[1] sc[*] v[1] sev[21]; P{y[+t7.7] v[+t1.8]=TRiP.HMC04039}attP40 | Bloomington<br>Drosophila Stock<br>Center | BDSC:55352;<br>FlyBase:FBst0055352<br>; |
| <i>D. melanogaster</i> . Expresses dsRNA for RNAi of tsu (FBgn0033378) under UAS control in the VALIUM20 vector.: y[1] sc[*] v[1] sev[21]; P{y[+t7.7] v[+t1.8]=TRiP.HMC04055}attP40   | Bloomington<br>Drosophila Stock<br>Center | BDSC:55367;<br>FlyBase:FBst0055367<br>; |
| <i>D. melanogaster</i> . Expresses dsRNA for RNAi of Notum (FBgn0044028) under UAS control in the VALIUM20 vector.: y[1] sc[*] v[1] sev[21]; P{y[+t7.7] v[+t1.8]=TRiP.HMC04067}attP40 | Bloomington<br>Drosophila Stock<br>Center | BDSC:55379;<br>FlyBase:FBst0055379<br>; |
| <i>D. melanogaster</i> . Expresses dsRNA for RNAi of sd (FBgn0003345) under UAS control in the VALIUM20 vector.: y[1] sc[*] v[1] sev[21]; P{y[+t7.7] v[+t1.8]=TRiP.HMC04092}attP40    | Bloomington<br>Drosophila Stock<br>Center | BDSC:55404;<br>FlyBase:FBst0055404<br>; |



|                                                                                                                                                                                                |                                           |                                         |
|------------------------------------------------------------------------------------------------------------------------------------------------------------------------------------------------|-------------------------------------------|-----------------------------------------|
| <i>D. melanogaster</i> . Expresses dsRNA for RNAi of Raf (FBgn0003079) under UAS control in the VALIUM20 vector.: y[1] sc[*] v[1] sev[21]; P{y[+t7.7] v[+t1.8]=TRiP.HMC03854}attP2             | Bloomington<br>Drosophila Stock<br>Center | BDSC:55679;<br>FlyBase:FBst0055679<br>; |
| <i>D. melanogaster</i> . Expresses dsRNA for RNAi of Mo25 (FBgn0017572) under UAS control in the VALIUM20 vector.: y[1] sc[*] v[1] sev[21]; P{y[+t7.7] v[+t1.8]=TRiP.HMC03865}attP2            | Bloomington<br>Drosophila Stock<br>Center | BDSC:55681;<br>FlyBase:FBst0055681<br>; |
| <i>D. melanogaster</i> . Expresses dsRNA for RNAi of ptc (FBgn0003892) under UAS control in the VALIUM20 vector.: y[1] sc[*] v[1] sev[21]; P{y[+t7.7] v[+t1.8]=TRiP.HMC03872}attP40            | Bloomington<br>Drosophila Stock<br>Center | BDSC:55686;<br>FlyBase:FBst0055686<br>; |
| <i>D. melanogaster</i> . Expresses dsRNA for RNAi of Pka-C2 (FBgn0000274) under UAS control in the VALIUM20 vector.: y[1] sc[*] v[1] sev[21]; P{y[+t7.7] v[+t1.8]=TRiP.HMC04129}attP2          | Bloomington<br>Drosophila Stock<br>Center | BDSC:55859;<br>FlyBase:FBst0055859<br>; |
| <i>D. melanogaster</i> . Expresses dsRNA for RNAi of sev (FBgn0003366) under UAS control in the VALIUM20 vector.: y[1] v[1]; P{y[+t7.7] v[+t1.8]=TRiP.HMC04136}attP2                           | Bloomington<br>Drosophila Stock<br>Center | BDSC:55866;<br>FlyBase:FBst0055866<br>; |
| <i>D. melanogaster</i> . Expresses dsRNA for RNAi of shf (FBgn0003390) under UAS control in the VALIUM20 vector.: y[1] sc[*] v[1] sev[21]; P{y[+t7.7] v[+t1.8]=TRiP.HMC04137}attP2             | Bloomington<br>Drosophila Stock<br>Center | BDSC:55867;<br>FlyBase:FBst0055867<br>; |
| <i>D. melanogaster</i> . Expresses dsRNA for RNAi of babo (FBgn0011300) under UAS control in the VALIUM20 vector.: y[1] sc[*] v[1] sev[21]; P{y[+t7.7] v[+t1.8]=TRiP.HMC04142}attP2/TM3, Sb[1] | Bloomington<br>Drosophila Stock<br>Center | BDSC:55871;<br>FlyBase:FBst0055871<br>; |
| <i>D. melanogaster</i> . Expresses dsRNA for RNAi of Shark (FBgn0015295) under UAS control in the VALIUM20 vector.: y[1] sc[*] v[1] sev[21]; P{y[+t7.7] v[+t1.8]=TRiP.HMC04146}attP2           | Bloomington<br>Drosophila Stock<br>Center | BDSC:55874;<br>FlyBase:FBst0055874<br>; |
| <i>D. melanogaster</i> . Expresses dsRNA for RNAi of Drl-2 (FBgn0033791) under UAS control in the VALIUM20 vector.: y[1] sc[*] v[1] sev[21]; P{y[+t7.7] v[+t1.8]=TRiP.HMC04172}attP2           | Bloomington<br>Drosophila Stock<br>Center | BDSC:55893;<br>FlyBase:FBst0055893<br>; |
| <i>D. melanogaster</i> . Expresses dsRNA for RNAi of Takl2 (FBgn0039015) under UAS control in the VALIUM20 vector.: y[1] v[1]; P{y[+t7.7] v[+t1.8]=TRiP.HMC04181}attP2                         | Bloomington<br>Drosophila Stock<br>Center | BDSC:55899;<br>FlyBase:FBst0055899<br>; |
| <i>D. melanogaster</i> . Expresses dsRNA for RNAi of Takl1 (FBgn0046689) under UAS control in the VALIUM20 vector.: y[1] sc[*] v[1] sev[21]; P{y[+t7.7] v[+t1.8]=TRiP.HMC04186}attP2           | Bloomington<br>Drosophila Stock<br>Center | BDSC:55903;<br>FlyBase:FBst0055903<br>; |



|                                                                                                                                                                                         |                                           |                                         |
|-----------------------------------------------------------------------------------------------------------------------------------------------------------------------------------------|-------------------------------------------|-----------------------------------------|
| <i>D. melanogaster</i> . Expresses dsRNA for RNAi of Doa (FBgn0265998) under UAS control in the VALIUM20 vector.: y[1] v[1]; P{y[+t7.7] v[+t1.8]=TRiP.HMC04193}attP2                    | Bloomington<br>Drosophila Stock<br>Center | BDSC:55908;<br>FlyBase:FBst0055908<br>; |
| <i>D. melanogaster</i> . Expresses dsRNA for RNAi of fus (FBgn0023441) under UAS control in the VALIUM20 vector.: y[1] sc[*] v[1] sev[21]; P{y[+t7.7] v[+t1.8]=TRiP.HMC04208}attP40     | Bloomington<br>Drosophila Stock<br>Center | BDSC:55921;<br>FlyBase:FBst0055921<br>; |
| <i>D. melanogaster</i> . Expresses dsRNA for RNAi of grk (FBgn0001137) under UAS control in the VALIUM20 vector.: y[1] sc[*] v[1] sev[21]; P{y[+t7.7] v[+t1.8]=TRiP.HMC04213}attP40     | Bloomington<br>Drosophila Stock<br>Center | BDSC:55926;<br>FlyBase:FBst0055926<br>; |
| <i>D. melanogaster</i> . Expresses dsRNA for RNAi of PpD3 (FBgn0005777) under UAS control in the VALIUM20 vector.: y[1] sc[*] v[1] sev[21]; P{y[+t7.7] v[+t1.8]=TRiP.HMS04508}attP40    | Bloomington<br>Drosophila Stock<br>Center | BDSC:57307;<br>FlyBase:FBst0057307<br>; |
| <i>D. melanogaster</i> . Expresses dsRNA for RNAi of Nct (FBgn0039234) under UAS control in the VALIUM20 vector.: y[1] sc[*] v[1] sev[21]; P{y[+t7.7] v[+t1.8]=TRiP.HMC04812}attP40     | Bloomington<br>Drosophila Stock<br>Center | BDSC:57497;<br>FlyBase:FBst0057497<br>; |
| <i>D. melanogaster</i> . Expresses dsRNA for RNAi of CG15436 (FBgn0031610) under UAS control in the VALIUM20 vector.: y[1] sc[*] v[1] sev[21]; P{y[+t7.7] v[+t1.8]=TRiP.HMC04637}attP40 | Bloomington<br>Drosophila Stock<br>Center | BDSC:57867;<br>FlyBase:FBst0057867<br>; |
| <i>D. melanogaster</i> . Expresses dsRNA for RNAi of Su(var)2-10 (FBgn0003612) under UAS control in the VALIUM20 vector.: y[1] v[1]; P{y[+t7.7] v[+t1.8]=TRiP.HMJ21959}attP40           | Bloomington<br>Drosophila Stock<br>Center | BDSC:58067;<br>FlyBase:FBst0058067<br>; |
| <i>D. melanogaster</i> . Expresses dsRNA for RNAi of Atg8a (FBgn0052672) under UAS control in the VALIUM20 vector.: y[1] v[1]; P{y[+t7.7] v[+t1.8]=TRiP.HMJ22416}attP40                 | Bloomington<br>Drosophila Stock<br>Center | BDSC:58309;<br>FlyBase:FBst0058309<br>; |
| <i>D. melanogaster</i> . Expresses dsRNA for RNAi of spz (FBgn0003495) under UAS control in the VALIUM20 vector.: y[1] v[1]; P{y[+t7.7] v[+t1.8]=TRiP.HMJ22258}attP40                   | Bloomington<br>Drosophila Stock<br>Center | BDSC:58499;<br>FlyBase:FBst0058499<br>; |
| <i>D. melanogaster</i> . Expresses dsRNA for RNAi of AstC-R1 (FBgn0036790) under UAS control in the VALIUM20 vector.: y[1] v[1]; P{y[+t7.7] v[+t1.8]=TRiP.HMJ23767}attP40/CyO           | Bloomington<br>Drosophila Stock<br>Center | BDSC:62372;<br>FlyBase:FBst0062372<br>; |
| <i>D. melanogaster</i> . Expresses dsRNA for RNAi of Ku80 (FBgn0041627) under UAS control in the VALIUM20 vector.: y[1] v[1]; P{y[+t7.7] v[+t1.8]=TRiP.HMJ24057}attP40/CyO              | Bloomington<br>Drosophila Stock<br>Center | BDSC:62513;<br>FlyBase:FBst0062513<br>; |

|                                                                                                                                                                                       |                                     |                                   |
|---------------------------------------------------------------------------------------------------------------------------------------------------------------------------------------|-------------------------------------|-----------------------------------|
| <i>D. melanogaster</i> . Expresses dsRNA for RNAi of CG2199 (FBgn0035213) under UAS control in the VALIUM20 vector.: y[1] v[1]; P{y[+t7.7] v[+t1.8]=TRiP.HMJ30228}attP40              | Bloomington Drosophila Stock Center | BDSC:63661; FlyBase:FBst0063661 ; |
| <i>D. melanogaster</i> . Expresses dsRNA for RNAi of tsr (FBgn0011726) under UAS control in the VALIUM20 vector.: y[1] sc[*] v[1] sev[21]; P{y[+t7.7] v[+t1.8]=TRiP.HMS00534}attP2    | Bloomington Drosophila Stock Center | BDSC:65055; FlyBase:FBst0065055 ; |
| <i>D. melanogaster</i> . Expresses dsRNA for RNAi of CG3630 (FBgn0023540) under UAS control in the VALIUM20 vector.: y[1] sc[*] v[1] sev[21]; P{y[+t7.7] v[+t1.8]=TRiP.HMC06220}attP2 | Bloomington Drosophila Stock Center | BDSC:65945; FlyBase:FBst0065945 ; |
| <i>D. melanogaster</i> . Expresses dsRNA for RNAi of tub (FBgn0003882) under UAS control in the VALIUM20 vector.: y[1] sc[*] v[1] sev[21]; P{y[+t7.7] v[+t1.8]=TRiP.HMS05426}attP40   | Bloomington Drosophila Stock Center | BDSC:66960; FlyBase:FBst0066960 ; |
| <i>D. melanogaster</i> . Expresses dsRNA for RNAi of eIF4E-6 (FBgn0039622) under UAS control.                                                                                         | Vienna Drosophila Resource Center   | VDRC:v17580                       |
| <i>D. melanogaster</i> . Expresses dsRNA for RNAi of gd (FBgn0000808) under UAS control.                                                                                              | Vienna Drosophila Resource Center   | VDRC:v14892                       |
| <i>D. melanogaster</i> . Expresses dsRNA for RNAi of Act88F (FBgn0000047) under UAS control.                                                                                          | Vienna Drosophila Resource Center   | VDRC:v9780                        |
| <i>D. melanogaster</i> . Expresses dsRNA for RNAi of eRF1 (FBgn0036974) under UAS control.                                                                                            | Vienna Drosophila Resource Center   | VDRC:v45027                       |
| <i>D. melanogaster</i> . Expresses dsRNA for RNAi of E(spl)m2-BFM (FBgn0002592) under UAS control.                                                                                    | Vienna Drosophila Resource Center   | VDRC:v30115                       |
| <i>D. melanogaster</i> . Expresses dsRNA for RNAi of tsl (FBgn0003867) under UAS control.                                                                                             | Vienna Drosophila Resource Center   | VDRC:v14430                       |
| <i>D. melanogaster</i> . Expresses dsRNA for RNAi of wbl (FBgn0004003) under UAS control.                                                                                             | Vienna Drosophila Resource Center   | VDRC:v13864                       |
| <i>D. melanogaster</i> . Expresses dsRNA for RNAi of boss (FBgn0000206) under UAS control.                                                                                            | Vienna Drosophila Resource Center   | VDRC:v4365                        |
| <i>D. melanogaster</i> . Expresses dsRNA for RNAi of CG32396 (FBgn0020251) under UAS control.                                                                                         | Vienna Drosophila Resource Center   | VDRC:v41896                       |
| <i>D. melanogaster</i> . Expresses dsRNA for RNAi of Rac2 (FBgn0014011) under UAS control.                                                                                            | Vienna Drosophila Resource Center   | VDRC:v28926                       |
| <i>D. melanogaster</i> . Expresses dsRNA for RNAi of ihog (FBgn0031872) under UAS control.                                                                                            | Vienna Drosophila Resource Center   | VDRC:v29898                       |
| <i>D. melanogaster</i> . Expresses dsRNA for RNAi of sog (FBgn0003463) under UAS control.                                                                                             | Vienna Drosophila Resource Center   | VDRC:v37405                       |
| <i>D. melanogaster</i> . Expresses dsRNA for RNAi of CG9314 (FBgn0032061) under UAS control.                                                                                          | Vienna Drosophila Resource Center   | VDRC:v44647                       |

|                                                                                                                     |                                   |             |
|---------------------------------------------------------------------------------------------------------------------|-----------------------------------|-------------|
| <i>D. melanogaster</i> . Expresses dsRNA for RNAi of <i>sgl</i> (FBgn0261445) under UAS control.                    | Vienna Drosophila Resource Center | VDRC:v29434 |
| <i>D. melanogaster</i> . Expresses dsRNA for RNAi of <i>mirr</i> (FBgn0014343) under UAS control.                   | Vienna Drosophila Resource Center | VDRC:v50134 |
| <i>D. melanogaster</i> . Expresses dsRNA for RNAi of <i>eIF-4B</i> (FBgn0020660) under UAS control.                 | Vienna Drosophila Resource Center | VDRC:v31364 |
| <i>D. melanogaster</i> . Expresses dsRNA for RNAi of <i>rasp</i> (FBgn0024194) under UAS control.                   | Vienna Drosophila Resource Center | VDRC:v6459  |
| <i>D. melanogaster</i> . Expresses dsRNA for RNAi of <i>PGRP-SA</i> (FBgn0030310) under UAS control.                | Vienna Drosophila Resource Center | VDRC:v5594  |
| <i>D. melanogaster</i> . Expresses dsRNA for RNAi of <i>sinah</i> (FBgn0259794) under UAS control.                  | Vienna Drosophila Resource Center | VDRC:v17118 |
| <i>D. melanogaster</i> . Expresses dsRNA for RNAi of <i>lft</i> (FBgn0032230) under UAS control.                    | Vienna Drosophila Resource Center | VDRC:v32146 |
| <i>D. melanogaster</i> . Expresses dsRNA for RNAi of <i>pyr</i> (FBgn0033649) under UAS control.                    | Vienna Drosophila Resource Center | VDRC:v36524 |
| <i>D. melanogaster</i> . Expresses dsRNA for RNAi of <i>Ssl</i> (FBgn0015300) under UAS control.                    | Vienna Drosophila Resource Center | VDRC:v17282 |
| <i>D. melanogaster</i> . Expresses dsRNA for RNAi of <i>Pvf2</i> (FBgn0031888) under UAS control.                   | Vienna Drosophila Resource Center | VDRC:v7628  |
| <i>D. melanogaster</i> . Expresses dsRNA for RNAi of <i>spz4</i> (FBgn0032362) under UAS control.                   | Vienna Drosophila Resource Center | VDRC:v7679  |
| <i>D. melanogaster</i> . Expresses dsRNA for RNAi of <i>IM23</i> (FBgn0034328) under UAS control.                   | Vienna Drosophila Resource Center | VDRC:v15384 |
| <i>D. melanogaster</i> . Expresses dsRNA for RNAi of <i>botv</i> (FBgn0027535) under UAS control.                   | Vienna Drosophila Resource Center | VDRC:v37186 |
| <i>D. melanogaster</i> . Expresses dsRNA for RNAi of <i>G6P</i> (FBgn0031463) under UAS control.                    | Vienna Drosophila Resource Center | VDRC:v7261  |
| <i>D. melanogaster</i> . Expresses dsRNA for RNAi of <i>stet</i> (FBgn0020248) under UAS control.                   | Vienna Drosophila Resource Center | VDRC:v7434  |
| <i>D. melanogaster</i> . Expresses dsRNA for RNAi of <i>RanBPM</i> (FBgn0262114) under UAS control.                 | Vienna Drosophila Resource Center | VDRC:v45981 |
| <i>D. melanogaster</i> . Expresses dsRNA for RNAi of <i>Src42A</i> (FBgn0264959) under UAS control.                 | Vienna Drosophila Resource Center | VDRC:v26019 |
| <i>D. melanogaster</i> . Expresses dsRNA for RNAi of <i>nkd</i> (FBgn0002945) under UAS control.                    | Vienna Drosophila Resource Center | VDRC:v3004  |
| <i>D. melanogaster</i> . Expresses dsRNA for RNAi of <i>boi</i> (FBgn0040388) under UAS control.                    | Vienna Drosophila Resource Center | VDRC:v3060  |
| <i>D. melanogaster</i> . Expresses dsRNA for RNAi of <i>CR45683</i> ; <i>Tehao</i> (FBgn0026760) under UAS control. | Vienna Drosophila Resource Center | VDRC:v17903 |

|                                                                                                      |                                   |              |
|------------------------------------------------------------------------------------------------------|-----------------------------------|--------------|
| <i>D. melanogaster</i> . Expresses dsRNA for RNAi of CG45087; Pepck (FBgn0003067) under UAS control. | Vienna Drosophila Resource Center | VDRC:v20529  |
| <i>D. melanogaster</i> . Expresses dsRNA for RNAi of RpL13A (FBgn0037351) under UAS control.         | Vienna Drosophila Resource Center | VDRC:v101369 |
| <i>D. melanogaster</i> . Expresses dsRNA for RNAi of Usp7 (FBgn0030366) under UAS control.           | Vienna Drosophila Resource Center | VDRC:v110324 |
| <i>D. melanogaster</i> . Expresses dsRNA for RNAi of tsg (FBgn0003865) under UAS control.            | Vienna Drosophila Resource Center | VDRC:v108750 |
| <i>D. melanogaster</i> . Expresses dsRNA for RNAi of nec (FBgn0002930) under UAS control.            | Vienna Drosophila Resource Center | VDRC:v108366 |
| <i>D. melanogaster</i> . Expresses dsRNA for RNAi of Nle (FBgn0021874) under UAS control.            | Vienna Drosophila Resource Center | VDRC:v110728 |
| <i>D. melanogaster</i> . Expresses dsRNA for RNAi of Brd (FBgn0000216) under UAS control.            | Vienna Drosophila Resource Center | VDRC:v107929 |
| <i>D. melanogaster</i> . Expresses dsRNA for RNAi of Shc (FBgn0015296) under UAS control.            | Vienna Drosophila Resource Center | VDRC:v103906 |
| <i>D. melanogaster</i> . Expresses dsRNA for RNAi of Hs6st (FBgn0038755) under UAS control.          | Vienna Drosophila Resource Center | VDRC:v110424 |
| <i>D. melanogaster</i> . Expresses dsRNA for RNAi of fz4 (FBgn0027342) under UAS control.            | Vienna Drosophila Resource Center | VDRC:v102339 |
| <i>D. melanogaster</i> . Expresses dsRNA for RNAi of bib (FBgn0000180) under UAS control.            | Vienna Drosophila Resource Center | VDRC:v103327 |
| <i>D. melanogaster</i> . Expresses dsRNA for RNAi of Wnt10 (FBgn0031903) under UAS control.          | Vienna Drosophila Resource Center | VDRC:v100867 |
| <i>D. melanogaster</i> . Expresses dsRNA for RNAi of Tom (FBgn0026320) under UAS control.            | Vienna Drosophila Resource Center | VDRC:v101652 |
| <i>D. melanogaster</i> . Expresses dsRNA for RNAi of Pli (FBgn0025574) under UAS control.            | Vienna Drosophila Resource Center | VDRC:v106776 |
| <i>D. melanogaster</i> . Expresses dsRNA for RNAi of drk (FBgn0004638) under UAS control.            | Vienna Drosophila Resource Center | VDRC:v105498 |
| <i>D. melanogaster</i> . Expresses dsRNA for RNAi of por (FBgn0004957) under UAS control.            | Vienna Drosophila Resource Center | VDRC:v100780 |
| <i>D. melanogaster</i> . Expresses dsRNA for RNAi of wls (FBgn0036141) under UAS control.            | Vienna Drosophila Resource Center | VDRC:v103812 |
| <i>D. melanogaster</i> . Expresses dsRNA for RNAi of CG6843 (FBgn0036827) under UAS control.         | Vienna Drosophila Resource Center | VDRC:v109411 |
| <i>D. melanogaster</i> . Expresses dsRNA for RNAi of spz3 (FBgn0031959) under UAS control.           | Vienna Drosophila Resource Center | VDRC:v102871 |
| <i>D. melanogaster</i> . Expresses dsRNA for RNAi of kuz (FBgn0259984) under UAS control.            | Vienna Drosophila Resource Center | VDRC:v107036 |

|                                                                                                        |                                   |              |
|--------------------------------------------------------------------------------------------------------|-----------------------------------|--------------|
| <i>D. melanogaster</i> . Expresses dsRNA for RNAi of Hs3st-B (FBgn0031005) under UAS control.          | Vienna Drosophila Resource Center | VDRC:v110601 |
| <i>D. melanogaster</i> . Expresses dsRNA for RNAi of Tace (FBgn0039734) under UAS control.             | Vienna Drosophila Resource Center | VDRC:v106335 |
| <i>D. melanogaster</i> . Expresses dsRNA for RNAi of eIF-1A (FBgn0026250) under UAS control.           | Vienna Drosophila Resource Center | VDRC:v100611 |
| <i>D. melanogaster</i> . Expresses dsRNA for RNAi of Socs16D (FBgn0030869) under UAS control.          | Vienna Drosophila Resource Center | VDRC:v100568 |
| <i>D. melanogaster</i> . Expresses dsRNA for RNAi of E(spl)malpha-BFM (FBgn0002732) under UAS control. | Vienna Drosophila Resource Center | VDRC:v109384 |
| <i>D. melanogaster</i> . Expresses dsRNA for RNAi of E(spl)m6-BFM (FBgn0002632) under UAS control.     | Vienna Drosophila Resource Center | VDRC:v101965 |
| <i>D. melanogaster</i> . Expresses dsRNA for RNAi of VhaM8.9 (FBgn0037671) under UAS control.          | Vienna Drosophila Resource Center | VDRC:v105281 |
| <i>D. melanogaster</i> . Expresses dsRNA for RNAi of melt (FBgn0023001) under UAS control.             | Vienna Drosophila Resource Center | VDRC:v105110 |
| <i>D. melanogaster</i> . Expresses dsRNA for RNAi of SkpB (FBgn0026176) under UAS control.             | Vienna Drosophila Resource Center | VDRC:v106521 |
| <i>D. melanogaster</i> . Expresses dsRNA for RNAi of CkIIbeta2 (FBgn0026136) under UAS control.        | Vienna Drosophila Resource Center | VDRC:v102633 |
| <i>D. melanogaster</i> . Expresses dsRNA for RNAi of spz6 (FBgn0035056) under UAS control.             | Vienna Drosophila Resource Center | VDRC:v100897 |
| <i>D. melanogaster</i> . Expresses dsRNA for RNAi of Rok (FBgn0026181) under UAS control.              | Vienna Drosophila Resource Center | VDRC:v104675 |
| <i>D. melanogaster</i> . Expresses dsRNA for RNAi of CG9962 (FBgn0031441) under UAS control.           | Vienna Drosophila Resource Center | VDRC:v108721 |
| <i>D. melanogaster</i> . Expresses dsRNA for RNAi of spz5 (FBgn0035379) under UAS control.             | Vienna Drosophila Resource Center | VDRC:v102389 |
| <i>D. melanogaster</i> . Expresses dsRNA for RNAi of Act57B (FBgn0000044) under UAS control.           | Vienna Drosophila Resource Center | VDRC:v102129 |
| <i>D. melanogaster</i> . Expresses dsRNA for RNAi of ndl (FBgn0002926) under UAS control.              | Vienna Drosophila Resource Center | VDRC:v102818 |
| <i>D. melanogaster</i> . Expresses dsRNA for RNAi of vn (FBgn0003984) under UAS control.               | Vienna Drosophila Resource Center | VDRC:v109437 |
| <i>D. melanogaster</i> . Expresses dsRNA for RNAi of ECSIT (FBgn0028436) under UAS control.            | Vienna Drosophila Resource Center | VDRC:v106141 |
| <i>D. melanogaster</i> . Expresses dsRNA for RNAi of SkpE (FBgn0031074) under UAS control.             | Vienna Drosophila Resource Center | VDRC:v109539 |
| <i>D. melanogaster</i> . Expresses dsRNA for RNAi of SkpF (FBgn0034863) under UAS control.             | Vienna Drosophila Resource Center | VDRC:v106572 |



|                                                                                               |                                   |              |
|-----------------------------------------------------------------------------------------------|-----------------------------------|--------------|
| <i>D. melanogaster</i> . Expresses dsRNA for RNAi of kek1 (FBgn0015399) under UAS control.    | Vienna Drosophila Resource Center | VDRC:v101166 |
| <i>D. melanogaster</i> . Expresses dsRNA for RNAi of ths (FBgn0033652) under UAS control.     | Vienna Drosophila Resource Center | VDRC:v102441 |
| <i>D. melanogaster</i> . Expresses dsRNA for RNAi of llp8 (FBgn0036690) under UAS control.    | Vienna Drosophila Resource Center | VDRC:v102604 |
| <i>D. melanogaster</i> . Expresses dsRNA for RNAi of CG15800 (FBgn0034904) under UAS control. | Vienna Drosophila Resource Center | VDRC:v110049 |
| <i>D. melanogaster</i> . Expresses dsRNA for RNAi of IM3 (FBgn0040736) under UAS control.     | Vienna Drosophila Resource Center | VDRC:v104908 |
| <i>D. melanogaster</i> . Expresses dsRNA for RNAi of Roc1a (FBgn0025638) under UAS control.   | Vienna Drosophila Resource Center | VDRC:v106315 |
| <i>D. melanogaster</i> . Expresses dsRNA for RNAi of dod (FBgn0015379) under UAS control.     | Vienna Drosophila Resource Center | VDRC:v110593 |
| <i>D. melanogaster</i> . Expresses dsRNA for RNAi of hipk (FBgn0035142) under UAS control.    | Vienna Drosophila Resource Center | VDRC:v108254 |
| <i>D. melanogaster</i> . Expresses dsRNA for RNAi of ave (FBgn0050476) under UAS control.     | Vienna Drosophila Resource Center | VDRC:v101471 |
| <i>D. melanogaster</i> . Expresses dsRNA for RNAi of boca (FBgn0004132) under UAS control.    | Vienna Drosophila Resource Center | VDRC:v108406 |
| <i>D. melanogaster</i> . Expresses dsRNA for RNAi of gskt (FBgn0046332) under UAS control.    | Vienna Drosophila Resource Center | VDRC:v107429 |
| <i>D. melanogaster</i> . Expresses dsRNA for RNAi of stumps (FBgn0020299) under UAS control.  | Vienna Drosophila Resource Center | VDRC:v105603 |
| <i>D. melanogaster</i> . Expresses dsRNA for RNAi of CG31431 (FBgn0051431) under UAS control. | Vienna Drosophila Resource Center | VDRC:v104697 |
| <i>D. melanogaster</i> . Expresses dsRNA for RNAi of scw (FBgn0005590) under UAS control.     | Vienna Drosophila Resource Center | VDRC:v105303 |
| <i>D. melanogaster</i> . Expresses dsRNA for RNAi of fry (FBgn0016081) under UAS control.     | Vienna Drosophila Resource Center | VDRC:v103569 |
| <i>D. melanogaster</i> . Expresses dsRNA for RNAi of Krn (FBgn0052179) under UAS control.     | Vienna Drosophila Resource Center | VDRC:v104299 |
| <i>D. melanogaster</i> . Expresses dsRNA for RNAi of pxb (FBgn0053207) under UAS control.     | Vienna Drosophila Resource Center | VDRC:v102240 |
| <i>D. melanogaster</i> . Expresses dsRNA for RNAi of cv-c (FBgn0285955) under UAS control.    | Vienna Drosophila Resource Center | VDRC:v105435 |
| <i>D. melanogaster</i> . Expresses dsRNA for RNAi of cic (FBgn0262582) under UAS control.     | Vienna Drosophila Resource Center | VDRC:v103805 |
| <i>D. melanogaster</i> . Expresses dsRNA for RNAi of dia (FBgn0011202) under UAS control.     | Vienna Drosophila Resource Center | VDRC:v103914 |



|                                                                                                 |                                   |              |
|-------------------------------------------------------------------------------------------------|-----------------------------------|--------------|
| <i>D. melanogaster</i> . Expresses dsRNA for RNAi of SkpD;SkpC (FBgn0026174) under UAS control. | Vienna Drosophila Resource Center | VDRC:v109181 |
| <i>D. melanogaster</i> . Expresses dsRNA for RNAi of drk (FBgn0004638) under UAS control.       | Vienna Drosophila Resource Center | VDRC:v105498 |
| <i>D. melanogaster</i> . Expresses dsRNA for RNAi of botv (FBgn0027535) under UAS control.      | Vienna Drosophila Resource Center | VDRC:v37186  |

1044

## 1045 Reagents

| Name          | Catalogue number                     | Usage                      |
|---------------|--------------------------------------|----------------------------|
| Hoechst 33321 | <a href="#">H1399</a> (ThermoFisher) | 1ug/ml final concentration |

1046

1047

## 1048 References

- 1049 Ables, E.T., Drummond-Barbosa, D., 2017. Steroid Hormones and the Physiological Regulation  
1050 of Tissue-Resident Stem Cells: Lessons from the *Drosophila* Ovary. *Current Stem Cell Reports*  
1051 3, 9-18.
- 1052 Albert, I., Albert, R., 2004. Conserved network motifs allow protein-protein interaction prediction.  
1053 *Bioinformatics* 20, 3346-3352.
- 1054 Albert, R., Barabási, A.-L., 2002. Statistical mechanics of complex networks. *Reviews of Modern*  
1055 *Physics* 74, 47-97.
- 1056 Allbee, A.W., Rincon-Limas, D.E., Biteau, B., 2018. *Lmx1a* is required for the development of  
1057 the ovarian stem cell niche in *Drosophila*. *Development* 145, dev163394.
- 1058 Azevedo, R.B.R., French, V., Partridge, L., 1996. Thermal evolution of egg size in *Drosophila*  
1059 *melanogaster*. *Evolution* 50, 2338-2345.
- 1060 Barabási, A.L., Albert, R., 1999. Emergence of scaling in random networks. *Science* 286, 509-  
1061 512.
- 1062 Barabási, A.L., Oltvai, Z.N., 2004. Network biology: understanding the cell's functional  
1063 organization. *Nat. Rev. Genet.* 5, 101-113.
- 1064 Barrett, K., Leptin, M., Settleman, J., 1997. The Rho GTPase and a putative RhoGEF mediate a  
1065 signaling pathway for the cell shape changes in *Drosophila* gastrulation. *Cell* 91, 905-915.
- 1066 Berger, S.I., Posner, J.M., Ma'ayan, A., 2007. Genes2Networks: connecting lists of gene  
1067 symbols using mammalian protein interactions databases. *BMC Bioinformatics* 8, 372.
- 1068 Bergland, A.O., Genissel, A., Nuzhdin, S.V., Tatar, M., 2008. Quantitative trait loci affecting  
1069 phenotypic plasticity and the allometric relationship of ovariole number and thorax length in  
1070 *Drosophila melanogaster*. *Genetics* 180, 567-582.
- 1071 Bolívar, J., Pearson, J., López-Onieva, L., González-Reyes, A., 2006. Genetic dissection of a  
1072 stem cell niche: the case of the *Drosophila* ovary. *Dev. Dyn.* 235, 2969-2979.
- 1073 Bromberg, K.D., Ma'ayan, A., Neves, S.R., Iyengar, R., 2008. Design logic of a cannabinoid  
1074 receptor signaling network that triggers neurite outgrowth. *Science* 320, 903-909.
- 1075 Capy, P., Pla, E., David, J.R., 1993. Phenotypic and genetic variability of morphometrical traits  
1076 in natural populations of *Drosophila melanogaster* and *D. simulans*. I. Geographic variations.  
1077 *Genet. Sel. Evol.* 25, 517-536.
- 1078 Capy, P., Pla, E., David, J.R., 1994. Phenotypic and genetic variability of morphometrical traits  
1079 in natural populations of *Drosophila melanogaster* and *D simulans*. II. Within-population  
1080 variability. *Genetics Selection Evolution* 26, 15-28.
- 1081 Cayirlioglu, P., Ward, W.O., Silver Key, S.C., Duronio, R.J., 2003. Transcriptional repressor  
1082 functions of *Drosophila* E2F1 and E2F2 cooperate to inhibit genomic DNA synthesis in ovarian  
1083 follicle cells. *Mol. Cell. Biol.* 23, 2123-2134.

- 1084 Chao, A.T., Dierick, H.A., Addy, T.M., Bejsovec, A., 2003. Mutations in eukaryotic release  
1085 factors 1 and 3 act as general nonsense suppressors in *Drosophila*. *Genetics* 165, 601-612.
- 1086 Chen, J., Godt, D., Gunsalus, K., Kiss, I., Goldberg, M., Laski, F.A., 2001. Cofilin/ADF is  
1087 required for cell motility during *Drosophila* ovary development and oogenesis. *Nature Cell Biol.*  
1088 3, 204-209.
- 1089 Chen, J.Y., Shen, C., Sivachenko, A.Y., 2006. Mining Alzheimer disease relevant proteins from  
1090 integrated protein interactome data. *Pacific Symposium on Biocomputing* 11, 367-378.
- 1091 Christiansen, A.E., Ding, T., Bergmann, A., 2012. Ligand-independent activation of the  
1092 Hedgehog pathway displays non-cell autonomous proliferation during eye development in  
1093 *Drosophila*. *Mech. Dev.* 129, 98-108.
- 1094 Cohet, Y., David, J.R., 1978. Control of the Adult reproductive Potential by Preimaginal thermal  
1095 Conditions. *Oecologia* 36, 295-306.
- 1096 Couderc, J.L., Godt, D., Zollman, S., Chen, J., Li, M., Tiong, S., Cramton, S.E., Sahut-Barnola,  
1097 I., Laski, F.A., 2002. The *bric a brac* locus consists of two paralogous genes encoding BTB/POZ  
1098 domain proteins and acts as a homeotic and morphogenetic regulator of imaginal development  
1099 in *Drosophila*. *Development* 129, 2419-2433.
- 1100 David, J.R., Bocquet, C., 1975. Similarities and differences in latitudinal adaptation of two  
1101 *Drosophila* sibling species. *Nature* 257, 588-590.
- 1102 Dobens, L., Jaeger, A., Peterson, J.S., Raftery, L.A., 2005. Bunched sets a boundary for Notch  
1103 signaling to pattern anterior eggshell structures during *Drosophila* oogenesis. *Dev. Biol.* 287,  
1104 425-437.
- 1105 Edwards, M.C., Wong, C., Elledge, S.J., 1998. Human cyclin K, a novel RNA polymerase II-  
1106 associated cyclin possessing both carboxy-terminal domain kinase and Cdk-activating kinase  
1107 activity. *Mol. Cell. Biol.* 18, 4291-4300.
- 1108 Foster, L.J., de Hoog, C.L., Zhang, Y., Zhang, Y., Xie, X., Mootha, V.K., Mann, M., 2006. A  
1109 mammalian organelle map by protein correlation profiling. *Cell* 125, 187-199.
- 1110 Gancz, D., Gilboa, L., 2013. Insulin and Target of rapamycin signaling orchestrate the  
1111 development of ovarian niche-stem cell units in *Drosophila*. *Development* 140, 4145-4154.
- 1112 Gancz, D., Lengil, T., Gilboa, L., 2011. Coordinated regulation of niche and stem cell precursors  
1113 by hormonal signaling. *PLoS Biol.* 9, e1001202.
- 1114 Gilboa, L., 2015. Organizing stem cell units in the *Drosophila* ovary. *Curr. Op. Genet. Dev.* 32C,  
1115 31-36.
- 1116 Giot, L., Bader, J.S., Brouwer, C., Chaudhuri, A., Kuang, B., Li, Y., Hao, Y.L., Ooi, C.E.,  
1117 Godwin, B., Vitols, E., Vijayadamodar, G., Pochart, P., Machineni, H., Welsh, M., Kong, Y.,  
1118 Zerhusen, B., Malcolm, R., Varrone, Z., Collis, A., Minto, M., Burgess, S., McDaniel, L.,  
1119 Stimpson, E., Spriggs, F., Williams, J., Neurath, K., Ioime, N., Agee, M., Voss, E., Furtak, K.,  
1120 Renzulli, R., Aanensen, N., Carrolla, S., Bickelhaupt, E., Lazovatsky, Y., DaSilva, A., Zhong, J.,  
1121 Stanyon, C.A., Finley, R.L., Jr., White, K.P., Braverman, M., Jarvie, T., Gold, S., Leach, M.,

- 1122 Knight, J., Shimkets, R.A., McKenna, M.P., Chant, J., Rothberg, J.M., 2003. A protein  
1123 interaction map of *Drosophila melanogaster*. *Science* 302, 1727-1736.
- 1124 Godt, D., Couderc, J.L., Cramton, S.E., Laski, F.A., 1993. Pattern formation in the limbs of  
1125 *Drosophila*: *bric à brac* is expressed in both a gradient and a wave-like pattern and is required  
1126 for specification and proper segmentation of the tarsus. *Development* 119, 799-812.
- 1127 Godt, D., Laski, F.A., 1995. Mechanisms of cell rearrangement and cell recruitment in  
1128 *Drosophila* ovary morphogenesis and the requirement of *bric à brac*. *Development* 121, 173-  
1129 187.
- 1130 Gonzalez, G., Uribe, J.C., Tari, L., Brophy, C., Baral, C., 2007. Mining gene-disease  
1131 relationships from biomedical literature: weighting protein-protein interactions and connectivity  
1132 measures. *Pacific Symposium on Biocomputing* 12, 28-39.
- 1133 Gonzalez, M.W., Kann, M.G., 2012. Chapter 4: Protein interactions and disease. *PLoS Comput*  
1134 *Biol* 8, e1002819.
- 1135 Gramates, L.S., Marygold, S.J., Santos, G.D., Urbano, J.M., Antonazzo, G., Matthews, B.B.,  
1136 Rey, A.J., Tabone, C.J., Crosby, M.A., Emmert, D.B., Falls, K., Goodman, J.L., Hu, Y., Ponting,  
1137 L., Schroeder, A.J., Strelets, V.B., Thurmond, J., Zhou, P., the FlyBase, C., 2016. FlyBase at  
1138 25: looking to the future. *Nucleic Acids Res.* 45, D663-D671.
- 1139 Green II, D.A., Extavour, C.G., 2012. Convergent Evolution of a Reproductive Trait Through  
1140 Distinct Developmental Mechanisms in *Drosophila*. *Dev. Biol.* 372, 120-130.
- 1141 Green II, D.A., Sarikaya, D.P., Extavour, C.G., 2011. Counting in oogenesis. *Cell Tissue Res.*  
1142 344, 207-212.
- 1143 Hahn, M.W., Kern, A.D., 2005. Comparative genomics of centrality and essentiality in three  
1144 eukaryotic protein-interaction networks. *Mol. Biol. Evol.* 22, 803-806.
- 1145 Harris, T.J., Peifer, M., 2004. Adherens junction-dependent and -independent steps in the  
1146 establishment of epithelial cell polarity in *Drosophila*. *J. Cell Biol.* 167, 135-147.
- 1147 Hartwell, L.H., Hopfield, J.J., Leibler, S., Murray, A.W., 1999. From molecular to modular cell  
1148 biology. *Nature* 402, C47-C52.
- 1149 Hilman, D., Gat, U., 2011. The evolutionary history of YAP and the hippo/YAP pathway. *Mol.*  
1150 *Biol. Evol.* 28, 2403-2417.
- 1151 Hodin, J., Riddiford, L.M., 1998. The ecdysone receptor and ultraspiracle regulate the timing  
1152 and progression of ovarian morphogenesis during *Drosophila* metamorphosis. *Dev. Genes Evol.*  
1153 208, 304-317.
- 1154 Hodin, J., Riddiford, L.M., 2000a. Different mechanisms underlie phenotypic plasticity and  
1155 interspecific variation for a reproductive character in Drosophilids (Insecta: Diptera). *Evolution* 5,  
1156 1638-1653.

- 1157 Hodin, J., Riddiford, L.M., 2000b. Parallel alterations in the timing of ovarian ecdysone receptor  
1158 and ultraspiracle expression characterize the independent evolution of larval reproduction in two  
1159 species of gall midges (Diptera: Cecidomyiidae). *Dev. Genes Evol.* 210, 358-372.
- 1160 Hsu, H.-J., Drummond-Barbosa, D., 2009. Insulin levels control female germline stem cell  
1161 maintenance via the niche in *Drosophila*. *Proc. Natl. Acad. Sci. USA* 106, 1117-1121.
- 1162 Huang, S.S., Fraenkel, E., 2009. Integrating proteomic, transcriptional, and interactome data  
1163 reveals hidden components of signaling and regulatory networks. *Science Signaling* 2, ra40.
- 1164 Ideker, T., Sharan, R., 2008. Protein networks in disease. *Genome Res.* 18, 644-652.
- 1165 Ito, T., Bulger, M., Kobayashi, R., Kadonaga, J.T., 1996. *Drosophila* NAP-1 is a core histone  
1166 chaperone that functions in ATP-facilitated assembly of regularly spaced nucleosomal arrays.  
1167 *Mol. Cell. Biol.* 16, 3112-3124.
- 1168 Jalili, M., Salehzadeh-Yazdi, A., Gupta, S., Wolkenhauer, O., Yaghmaie, M., Resendis-Antonio,  
1169 O., Alimoghaddam, K., 2016. Evolution of Centrality Measurements for the Detection of  
1170 Essential Proteins in Biological Networks. *Frontiers in Physiology* 7, 375.
- 1171 Jansen, R., Greenbaum, D., Gerstein, M., 2002. Relating whole-genome expression data with  
1172 protein-protein interactions. *Genome Res.* 12, 37-46.
- 1173 Jeong, H., Mason, S.P., Barabási, A.L., Oltvai, Z.N., 2001. Lethality and centrality in protein  
1174 networks. *Nature* 411, 41-42.
- 1175 Jiang, K., Liu, Y., Zhang, J., Jia, J., 2018. An intracellular activation of Smoothed that is  
1176 independent of Hedgehog stimulation in *Drosophila*. *J. Cell Sci.* 131, jcs211367.
- 1177 Kambysellis, M.P., Heed, W.B., 1971. Studies of Oogenesis in Natural Populations of  
1178 *Drosophilidae*. I. Relation of ovarian development and ecological habitats of the Hawaiian  
1179 species. *Am. Nat.* 941, 31-49.
- 1180 Kanehisa, M., Goto, S., Furumichi, M., Tanabe, M., Hirakawa, M., 2010. KEGG for  
1181 representation and analysis of molecular networks involving diseases and drugs. *Nucleic Acids*  
1182 *Res.* 38, D355-360.
- 1183 Kasza, K.E., Farrell, D.L., Zallen, J.A., 2014. Spatiotemporal control of epithelial remodeling by  
1184 regulated myosin phosphorylation. *Proc. Natl. Acad. Sci. USA* 111, 11732-11737.
- 1185 Keller, R., 2006. Mechanisms of elongation in embryogenesis. *Development* 133, 2291-2302.
- 1186 King, R.C., 1970. *Ovarian Development in Drosophila melanogaster*. Academic Press, New  
1187 York.
- 1188 King, R.C., Aggarwal, S.K., Aggarwal, U., 1968. The Development of the Female *Drosophila*  
1189 Reproductive System. *J. Morphol.* 124, 143-166.
- 1190 Klepsatel, P., Galikova, M., De Maio, N., Huber, C.D., Schlotterer, C., Flatt, T., 2013a. Variation  
1191 in thermal performance and reaction norms among populations of *Drosophila melanogaster*.  
1192 *Evolution* 67, 3573-3587.

- 1193 Klepsatel, P., Galikova, M., De Maio, N., Ricci, S., Schlotterer, C., Flatt, T., 2013b. Reproductive  
1194 and post-reproductive life history of wild-caught *Drosophila melanogaster* under laboratory  
1195 conditions. *J. Evol. Biol.* 26, 1508-1520.
- 1196 Koschutski, D., Schreiber, F., 2008. Centrality analysis methods for biological networks and  
1197 their application to gene regulatory networks. *Gene Regulation and Systems Biology* 2, 193-  
1198 201.
- 1199 LaFever, L., Drummond-Barbosa, D., 2005. Direct control of germline stem cell division and cyst  
1200 growth by neural insulin in *Drosophila*. *Science* 309, 1071-1073.
- 1201 LaFever, L., Feoktistov, A., Hsu, H.J., Drummond-Barbosa, D., 2010. Specific roles of Target of  
1202 rapamycin in the control of stem cells and their progeny in the *Drosophila* ovary. *Development*  
1203 137, 2117-2126.
- 1204 Lai, C.M., Lin, K.Y., Kao, S.H., Chen, Y.N., Huang, F., Hsu, H.J., 2017. Hedgehog signaling  
1205 establishes precursors for germline stem cell niches by regulating cell adhesion. *J. Cell Biol.*  
1206 216, 1439-1453.
- 1207 Lee, R.T., Zhao, Z., Ingham, P.W., 2016. Hedgehog signalling. *Development* 143, 367-372.
- 1208 Lewellyn, L., Cetera, M., Horne-Badovinac, S., 2013. Misshapen decreases integrin levels to  
1209 promote epithelial motility and planar polarity in *Drosophila*. *J. Cell Biol.* 200, 721-729.
- 1210 Li, X., Wu, M., Kwoh, C.K., Ng, S.K., 2010. Computational approaches for detecting protein  
1211 complexes from protein interaction networks: a survey. *BMC Genomics* 11 Suppl 1, S3.
- 1212 Llamazares, S., Moreira, A., Tavares, A., Girdham, C., Spruce, B.A., Gonzalez, C., Karess,  
1213 R.E., Glover, D.M., Sunkel, C.E., 1991. *polo* encodes a protein kinase homolog required for  
1214 mitosis in *Drosophila*. *Genes Dev.* 5, 2153-2165.
- 1215 Lobell, A.S., Kaspari, R.R., Serrano Negron, Y.L., Harbison, S.T., 2017. The Genetic  
1216 Architecture of Ovariole Number in *Drosophila melanogaster*. *Genes with Major, Quantitative,*  
1217 *and Pleiotropic Effects.* *G3* 7, 2391-2403.
- 1218 Ma'ayan, A., 2011. Introduction to network analysis in systems biology. *Sci Signal* 4, tr5.
- 1219 Markow, T.A., Beall, S., Matzkin, L.M., 2009. Egg size, embryonic development time and  
1220 ovoviviparity in *Drosophila* species. *J. Evol. Biol.* 22, 430-434.
- 1221 Matthews, L.R., Vaglio, P., Reboul, J., Ge, H., Davis, B.P., Garrels, J., Vincent, S., Vidal, M.,  
1222 2001. Identification of potential interaction networks using sequence-based searches for  
1223 conserved protein-protein interactions or "interologs". *Genome Res.* 11, 2120-2126.
- 1224 Mbodj, A., Junion, G., Brun, C., Furlong, E.E., Thieffry, D., 2013. Logical modelling of  
1225 *Drosophila* signalling pathways. *Molecular BioSystems* 9, 2248-2258.
- 1226 Mizuno, T., Amano, M., Kaibuchi, K., Nishida, Y., 1999. Identification and characterization of  
1227 *Drosophila* homolog of Rho-kinase. *Gene* 238, 437-444.



- 1228 Orgogozo, V., Broman, K.W., Stern, D.L., 2006. High-resolution quantitative trait locus mapping  
1229 reveals sign epistasis controlling ovariole number between two *Drosophila* species. *Genetics*  
1230 173, 197-205.
- 1231 R'Kha, S., Capy, P., David, J.R., 1991. Host-plant specialization in the *Drosophila melanogaster*  
1232 species complex: A physiological, behavioral, and genetic analysis. *Proc. Natl. Acad. Sci. USA*  
1233 88, 1835-1839.
- 1234 R'kha, S., Moreteau, B., Coyne, J.A., David, J.R., 1997. Evolution of a lesser fitness trait: egg  
1235 production in the specialist *Drosophila sechellia*. *Genetical research* 69, 17-23.
- 1236 Ravasz, E., Somera, A.L., Mongru, D.A., Oltvai, Z.N., Barabási, A.L., 2002. Hierarchical  
1237 organization of modularity in metabolic networks. *Science* 297, 1551-1555.
- 1238 Ridley, A.J., 2006. Rho GTPases and actin dynamics in membrane protrusions and vesicle  
1239 trafficking. *Trends Cell Biol.* 16, 522-529.
- 1240 Sahut-Barnola, I., Dastugue, B., Couderc, J.-L., 1996. Terminal filament cell organization in the  
1241 larval ovary of *Drosophila melanogaster*: ultrastructural observations and pattern of divisions.  
1242 *Roux's Archives of Developmental Biology* 205, 356-363.
- 1243 Sahut-Barnola, I., Godt, D., Laski, F.A., Couderc, J.-L., 1995. *Drosophila* Ovary Morphogenesis:  
1244 Analysis of Terminal Filament Formation and Identification of a Gene Required for This Process.  
1245 *Dev. Biol.* 170, 127-135.
- 1246 Sarikaya, D.P., Belay, A.A., Ahuja, A., Green II, D.A., Dorta, A., Extavour, C.G., 2012. The roles  
1247 of cell size and cell number in determining ovariole number in *Drosophila*. *Dev. Biol.* 363, 279-  
1248 289
- 1249 Sarikaya, D.P., Church, S.H., Lagomarsino, L.P., Magnacca, K.M., Montgomery, S.L., Price,  
1250 D.P., Kaneshiro, K.Y., Extavour, C.G., 2019. Reproductive capacity evolves in response to  
1251 ecology through common developmental mechanisms in Hawai'ian *Drosophila*. *Curr. Biol.* 29,  
1252 1877-1884.
- 1253 Sarikaya, D.P., Extavour, C.G., 2015. The Hippo pathway regulates homeostatic growth of stem  
1254 cell niche precursors in the *Drosophila* ovary. *PLoS Genetics* 11, e1004962.
- 1255 Sebe-Pedros, A., Zheng, Y., Ruiz-Trillo, I., Pan, D., 2012. Premetazoan origin of the hippo  
1256 signaling pathway. *Cell Reports* 1, 13-20.
- 1257 Spellman, P.T., Sherlock, G., Zhang, M.Q., Iyer, V.R., Anders, K., Eisen, M.B., Brown, P.O.,  
1258 Botstein, D., Futcher, B., 1998. Comprehensive identification of cell cycle-regulated genes of the  
1259 yeast *Saccharomyces cerevisiae* by microarray hybridization. *Mol. Biol. Cell* 9, 3273-3297.
- 1260 Srinivasan, B.S., Shah, N.H., Flannick, J.A., Abeliuk, E., Novak, A.F., Batzoglou, S., 2007.  
1261 Current progress in network research: toward reference networks for key model organisms.  
1262 *Brief. Bioinform.* 8, 318-332.
- 1263 von Mering, C., Krause, R., Snel, B., Cornell, M., Oliver, S.G., Fields, S., Bork, P., 2002.  
1264 Comparative assessment of large-scale data sets of protein-protein interactions. *Nature* 417,  
1265 399-403.

- 1266 Wachi, S., Yoneda, K., Wu, R., 2005. Interactome-transcriptome analysis reveals the high  
1267 centrality of genes differentially expressed in lung cancer tissues. *Bioinformatics* 21, 4205-4208.
- 1268 Wang, R.S., Hall, K.T., Giulianini, F., Passow, D., Kaptchuk, T.J., Loscalzo, J., 2017. Network  
1269 analysis of the genomic basis of the placebo effect. *JCI Insight* 2, 93911.
- 1270 Wang, R.S., Loscalzo, J., 2018. Network-Based Disease Module Discovery by a Novel Seed  
1271 Connector Algorithm with Pathobiological Implications. *J. Mol. Biol.* 430, 2939-2950.
- 1272 Watts, D.J., Strogatz, S.H., 1998. Collective dynamics of 'small-world' networks. *Nature* 393,  
1273 440-442.
- 1274 Wayne, M.L., Hackett, J.B., Dilda, C.L., Nuzhdin, S.V., Pasyukova, E.G., Mackay, T.F., 2001.  
1275 Quantitative trait locus mapping of fitness-related traits in *Drosophila melanogaster*. *Genetical*  
1276 *research* 77, 107-116.
- 1277 Wayne, M.L., Hackett, J.B., Mackay, T.F.C., 1997. Quantitative Genetics of Ovariole Number in  
1278 *Drosophila melanogaster*. I. Segregating Variation and Fitness. *Evolution* 4, 1156-1163.
- 1279 Wayne, M.L., McIntyre, L.M., 2002. Combining mapping and arraying: An approach to candidate  
1280 gene identification. *Proc. Natl. Acad. Sci. USA* 99, 14903-14906.
- 1281 Yang, X., Xu, T., 2011. Molecular mechanism of size control in development and human  
1282 diseases. *Cell Research* 21, 715-729.
- 1283 Yook, S.H., Oltvai, Z.N., Barabási, A.L., 2004. Functional and topological characterization of  
1284 protein interaction networks. *Proteomics* 4, 928-942.
- 1285 Yu, H., Paccanaro, A., Trifonov, V., Gerstein, M., 2006. Predicting interactions in protein  
1286 networks by completing defective cliques. *Bioinformatics* 22, 823-829.
- 1287 Zhang, Y., Lin, H., Yang, Z., Wang, J., Liu, Y., 2017. An uncertain model-based approach for  
1288 identifying dynamic protein complexes in uncertain protein-protein interaction networks. *BMC*  
1289 *Genomics* 18, 743.
- 1290
